# Supplementary material
Source: PubMed Central journal article supplement (PMC7684148)

## **Supporting information**

### **Inhibitory activity of amyloid $\beta$ aggregation of triterpene saponins from cactus, *Stenocereus pruinosus***

Koji Fujihara,<sup>†</sup> Takuya Shimoyama,<sup>†</sup> Ryo Kawazu,<sup>†</sup> Hiroaki Sasaki,<sup>†</sup> Kiyotaka  
Koyama,<sup>†</sup> Kunio Takahashi,<sup>†</sup> Kaoru Kinoshita\*<sup>†</sup>

<sup>†</sup> Department of Pharmacognosy and Phytochemistry, Meiji Pharmaceutical University,  
2-522-1 Noshio, Kiyose-shi, Tokyo 204-8588, Japan

## Contents

### Extraction and isolation

**Table 1.**  $^1\text{H}$ - and  $^{13}\text{C}$ -NMR spectroscopic data for compounds **6** (500 MHz for  $^1\text{H}$  and 125 MHz for  $^{13}\text{C}$ , in  $\text{DMSO-}d_6$ ).

**Figure 1.** HMBC, COSY, and Key NOESY Correlations of **3**.

**Figure 2.** HMBC, COSY, and Key NOESY Correlations of **6**.

**Figure 3.** HMBC, COSY, and Key NOESY Correlations of **7**.

**Figure 4.**  $^1\text{H}$  NMR spectrum (500 MHz) of chichipenoside D (**1**) in  $\text{DMSO-}d_6$ .

**Figure 5.**  $^{13}\text{C}$  NMR spectrum (125 MHz) of chichipenoside D (**1**) in  $\text{DMSO-}d_6$ .

**Figure 6.** DEPT 90 and 135 pulse NMR spectra of chichipenoside D (**1**) in  $\text{DMSO-}d_6$ .

**Figure 7.** DQF-COSY spectrum of chichipenoside D (**1**) in  $\text{DMSO-}d_6$ .

**Figure 8.** HMQC spectrum of chichipenoside D (**1**) in  $\text{DMSO-}d_6$ .

**Figure 9.** HMBC spectrum of chichipenoside D (**1**) in  $\text{DMSO-}d_6$ .

**Figure 10.** HSQC-TOCSY spectrum of chichipenoside D (**1**) in  $\text{DMSO-}d_6$ .

**Figure 11.** pfg-TOCSY spectrum of chichipenoside D (**1**) in  $\text{DMSO-}d_6$ .

**Figure 12.** NOESY spectrum of chichipenoside D (**1**) in  $\text{DMSO-}d_6$ .

**Figure 13.**  $^1\text{H}$  NMR spectrum (500 MHz) of longispinoside A (**2**) in  $\text{DMSO-}d_6$ .

**Figure 14.**  $^{13}\text{C}$  NMR spectrum (125 MHz) of longispinoside A (**2**) in  $\text{DMSO-}d_6$ .

**Figure 15.** DEPT 90 and 135 pulse NMR spectra of longispinoside A (**2**) in  $\text{DMSO-}d_6$ .

**Figure 16.** DQF-COSY spectrum of longispinoside A (**2**) in  $\text{DMSO-}d_6$ .

**Figure 17.** HMQC spectrum of longispinoside A (**2**) in  $\text{DMSO-}d_6$ .

**Figure 18.** HMBC spectrum of longispinoside A (**2**) in  $\text{DMSO-}d_6$ .

**Figure 19.** HSQC-TOCSY spectrum of longispinoside A (**2**) in  $\text{DMSO-}d_6$ .

**Figure 20.** pfg-TOCSY spectrum of longispinoside A (**2**) in  $\text{DMSO-}d_6$ .

**Figure 21.** NOESY spectrum of longispinoside A (**2**) in  $\text{DMSO-}d_6$ .

**Figure 22.**  $^1\text{H}$  NMR spectrum (500 MHz) of longispinoside A methyl ester (**3**) in  $\text{DMSO-}d_6$ .

**Figure 23.**  $^{13}\text{C}$  NMR spectrum (125 MHz) of longispinoside A methyl ester (**3**) in  $\text{DMSO-}d_6$ .

**Figure 24.** DEPT 90 and 135 pulse NMR spectra of longispinoside A methyl ester (**3**) in  $\text{DMSO-}d_6$ .

**Figure 25.** DQF-COSY spectrum of longispinoside A methyl ester (**3**) in  $\text{DMSO-}d_6$ .

**Figure 26.** HMQC spectrum of longispinoside A methyl ester (**3**) in  $\text{DMSO-}d_6$ .

**Figure 27.** HMBC spectrum of longispinoside A methyl ester (**3**) in  $\text{DMSO-}d_6$ .

**Figure 28.** HSQC-TOCSY spectrum of longispinoside A methyl ester (**3**) in  $\text{DMSO-}d_6$ .

**Figure 29.** pfg-TOCSY spectrum of longispinoside A methyl ester (**3**) in  $\text{DMSO-}d_6$ .

**Figure 30.** NOESY spectrum of longispinoside A methyl ester (**3**) in  $\text{DMSO-}d_6$ .

**Figure 31.**  $^1\text{H}$  NMR spectrum (500 MHz) of erythronoside A methyl ester (**4**) in  $\text{DMSO-}d_6$ .

**Figure 32.**  $^{13}\text{C}$  NMR spectrum (125 MHz) of erythronoside A methyl ester (**4**) in  $\text{DMSO-}d_6$ .

**Figure 33.** DEPT 90 and 135 pulse NMR spectra of erythronoside A methyl ester (**4**) in  $\text{DMSO-}d_6$ .

**Figure 34.** DQF-COSY spectrum of erythronoside A methyl ester (**4**) in  $\text{DMSO-}d_6$ .

**Figure 35.** HMQC spectrum of erythronoside A methyl ester (**4**) in  $\text{DMSO-}d_6$ .

**Figure 36.** HMBC spectrum of erythronoside A methyl ester (**4**) in  $\text{DMSO-}d_6$ .

**Figure 37.** HSQC-TOCSY spectrum of erythronoside A methyl ester (**4**) in  $\text{DMSO-}d_6$ .

**Figure 38.** pfg-TOCSY spectrum of erythronoside A methyl ester (**4**) in DMSO-*d*<sub>6</sub>.

**Figure 39.** NOESY spectrum of erythronoside A methyl ester (**4**) in DMSO-*d*<sub>6</sub>.

**Figure 40.** <sup>1</sup>H NMR spectrum (500 MHz) of cochalinoside C (**5**) in DMSO-*d*<sub>6</sub>.

**Figure 41.** <sup>13</sup>C NMR spectrum (125 MHz) of cochalinoside C (**5**) in DMSO-*d*<sub>6</sub>.

**Figure 42.** DEPT 90 and 135 pulse NMR spectra of cochalinoside C (**5**) in DMSO-*d*<sub>6</sub>.

**Figure 43.** DQF-COSY spectrum of cochalinoside C (**5**) in DMSO-*d*<sub>6</sub>.

**Figure 44.** HMQC spectrum of cochalinoside C (**5**) in DMSO-*d*<sub>6</sub>.

**Figure 45.** HMBC spectrum of cochalinoside C (**5**) in DMSO-*d*<sub>6</sub>.

**Figure 46.** HSQC-TOCSY spectrum of cochalinoside C (**5**) in DMSO-*d*<sub>6</sub>.

**Figure 47.** pfg-TOCSY spectrum of cochalinoside C (**5**) in DMSO-*d*<sub>6</sub>.

**Figure 48.** NOESY spectrum of cochalinoside C (**5**) in DMSO-*d*<sub>6</sub>.

**Figure 49.** <sup>1</sup>H NMR spectrum (500 MHz) of oleanolic acid 3-*O*-β-D-xylopyranosyl-(1→2)-α-L-rhamnopyranosyl-(1→3)-β-D-glucuronopyranosyl-28-*O*-β-D-glucopyranoside (**6**) in DMSO-*d*<sub>6</sub>.

**Figure 50.** <sup>13</sup>C NMR spectrum (125 MHz) of oleanolic acid 3-*O*-β-D-xylopyranosyl-(1→2)-α-L-rhamnopyranosyl-(1→3)-β-D-glucuronopyranosyl-28-*O*-β-D-glucopyranoside (**6**) in DMSO-*d*<sub>6</sub>.

**Figure 51.** DEPT 90 and 135 pulse NMR spectra of oleanolic acid 3-*O*-β-D-xylopyranosyl-(1→2)-α-L-rhamnopyranosyl-(1→3)-β-D-glucuronopyranosyl-28-*O*-β-D-glucopyranoside (**6**) in DMSO-*d*<sub>6</sub>.

**Figure 52.** <sup>1</sup>H-<sup>1</sup>H-COSY spectrum of oleanolic acid 3-*O*-β-D-xylopyranosyl-(1→2)-α-L-rhamnopyranosyl-(1→3)-β-D-glucuronopyranosyl-28-*O*-β-D-glucopyranoside (**6**) in DMSO-*d*<sub>6</sub>.

**Figure 53.** HMQC spectrum of oleanolic acid 3-*O*-β-D-xylopyranosyl-(1→2)-α-L-rhamnopyranosyl-(1→3)-β-D-glucuronopyranosyl-28-*O*-β-D-glucopyranoside (**6**) in DMSO-*d*<sub>6</sub>.

**Figure 54.** HMBC spectrum of oleanolic acid 3-*O*-β-D-xylopyranosyl-(1→2)-α-L-rhamnopyranosyl-(1→3)-β-D-glucuronopyranosyl-28-*O*-β-D-glucopyranoside (**6**) in DMSO-*d*<sub>6</sub>.

**Figure 55.** HSQC-TOCSY spectrum of oleanolic acid 3-*O*-β-D-xylopyranosyl-(1→2)-α-L-rhamnopyranosyl-(1→3)-β-D-glucuronopyranosyl-28-*O*-β-D-glucopyranoside (**6**) in DMSO-*d*<sub>6</sub>.

**Figure 56.** pfg-TOCSY spectrum of oleanolic acid 3-*O*-β-D-xylopyranosyl-(1→2)-α-L-rhamnopyranosyl-(1→3)-β-D-glucuronopyranosyl-28-*O*-β-D-glucopyranoside (**6**) in DMSO-*d*<sub>6</sub>.

**Figure 57.** NOESY spectrum of oleanolic acid 3-*O*-β-D-xylopyranosyl-(1→2)-α-L-rhamnopyranosyl-(1→3)-β-D-glucuronopyranosyl-28-*O*-β-D-glucopyranoside (**6**) in DMSO-*d*<sub>6</sub>.

**Figure 58.** <sup>1</sup>H NMR spectrum (500 MHz) of stenoside A (**7**) in DMSO-*d*<sub>6</sub>.

**Figure 59.** <sup>13</sup>C NMR spectrum (125 MHz) of stenoside A (**7**) in DMSO-*d*<sub>6</sub>.

**Figure 60.** DEPT 90 and 135 pulse NMR spectra of stenoside A (**7**) in DMSO-*d*<sub>6</sub>.

**Figure 61.** DQF-COSY spectrum of stenoside A (**7**) in DMSO-*d*<sub>6</sub>.

**Figure 62.** HMQC spectrum of stenoside A (**7**) in DMSO-*d*<sub>6</sub>.

**Figure 63.** HMBC spectrum of stenoside A (**7**) in DMSO-*d*<sub>6</sub>.

**Figure 64.** HSQC-TOCSY spectrum of stenoside A (**7**) in DMSO-*d*<sub>6</sub>.

**Figure 65.** pfg-TOCSY spectrum of stenoside A (**7**) in DMSO-*d*<sub>6</sub>.

**Figure 66.** NOESY spectrum of stenoside A (**7**) in DMSO-*d*<sub>6</sub>.

## Extraction and isolation

Aerial parts of *S. pruinosus* were dried, and the dry powder (639.1 g) was extracted three times with  $\text{CHCl}_3$  and then extracted three times with MeOH. The MeOH extract (144.2 g) was applied to a Diaion HP-20 column, which was successively eluted with  $\text{H}_2\text{O}$ , 30% MeOH (MeOH- $\text{H}_2\text{O}$  30:70, v/v), 70% MeOH, and 100% MeOH to give 4 fractions [ $\text{H}_2\text{O}$ -eluted fraction (disposal), 30% MeOH-eluted fraction (15.0 g), 70% MeOH-eluted fraction (60.3 g), and 100% MeOH-eluted fraction (106.5 g)], respectively.

The 70% MeOH-eluted fraction (60.3 g) was subjected to silica gel column chromatography (Si. C. C.) using a stepwise gradient ( $\text{CHCl}_3$ -MeOH- $\text{H}_2\text{O}$  60:14:1  $\rightarrow$  150:50:4  $\rightarrow$  150:60:4  $\rightarrow$  30:15:1  $\rightarrow$  30:18:1  $\rightarrow$  30:20:1  $\rightarrow$  6:4:1  $\rightarrow$  MeOH) to give 10 fractions (Fr. A: 0.1 mg, Fr. B: 2.3 mg, Fr. C: 1.0 mg, Fr. D: 620.1 mg, Fr. E: 409.0 mg, Fr. F: 2.6 g, Fr. G: 4.6 g, Fr. H: 10.3 g, Fr. I: 26.0 g, Fr. J: 10.9 g). Fr. H (10.3 g) was subjected to Si. C. C. using a stepwise gradient ( $\text{CHCl}_3$ -MeOH- $\text{H}_2\text{O}$  30:18:1  $\rightarrow$  30:20:1  $\rightarrow$  6:4:1  $\rightarrow$  MeOH) to give 3 fractions (Fr. Ha: 0.1 mg, Fr. Hb: 7.5 g, Fr. Hc: 1.0 g). Fr. Hb (7.5 g) was subjected to Si. C. C. using a stepwise gradient ( $\text{CHCl}_3$ -MeOH- $\text{H}_2\text{O}$  75:30:2  $\rightarrow$  30:15:1  $\rightarrow$  30:18:1  $\rightarrow$  30:20:1  $\rightarrow$  6:4:1  $\rightarrow$  MeOH) to give 5 fractions (Fr. Hb1: 29.2 mg, Fr. Hb2: 853.5 mg, Fr. Hb3: 886.0 mg, Fr. Hb4: 5.0 g, Fr. Hb5: 315.7 mg). Fr. Hb4 (5.00 g) was subjected to Si. C. C. using a stepwise gradient ( $\text{CHCl}_3$ -MeOH- $\text{H}_2\text{O}$

75:30:2 → 30:15:1 → 30:18:1 → 30:20:1 → 6:4:1 → MeOH) to give 3 fractions (Fr. Hb4-1: 770.2 mg, Fr. Hb4-2: 4.1 g, Fr. Hb4-3: 21.6 mg). Fr. Hb4-2 (4.1 g) was subjected to octadecyl silylated silica gel column chromatography (ODS C. C.) using a stepwise gradient (MeOH-H<sub>2</sub>O 30:70 → 50:50 → 60:40 → 70:30 → 80:20 → 90:10 → MeOH) to give 5 fractions (Fr. Hb4-2a: 213.1 mg, Fr. Hb4-2b: 93.6 mg, Fr. Hb4-2c: 1.8 g, Fr. Hb4-2d: 1.0 g, Fr. Hb4-2e: 644.5 mg). Fr. Hb4-2b (93.6 mg) was subjected to ODS C. C. using a stepwise gradient (MeOH-H<sub>2</sub>O 40:60 → 50:50 → 60:40 → 70:30 → MeOH) to give 3 fractions (Fr. Hb4-2b-1: 2.4 mg, Fr. Hb4-2b-2: 48.3 mg, Fr. Hb4-2b-3: 48.3 mg). Fr. Hb4-2b-2 (48.3 mg) was further separated by Si. C. C. using a stepwise gradient (CHCl<sub>3</sub>-MeOH-H<sub>2</sub>O 75:30:2 → 30:15:1 → 30:18:1 → 30:20:1 → 6:4:1 → MeOH) to afford chichipenoside D (**1**, 16.7 mg, 0.003%, Fr. Hb4-2b-2d).

Fr. Hb4-2d (1.0 g) was subjected to ODS C. C. using a stepwise gradient (MeOH-H<sub>2</sub>O 30:70 → 50:50 → 60:40 → 70:30 → 80:20 → 90:10 → MeOH) to give 3 fractions (Fr. Hb4-2d-1: 10.8 mg, Fr. Hb4-2d-2: 905.5 mg, Fr. Hb4-2d-3: 118.9 mg). Fr. Hb4-2d-2 (905.5 mg) was subjected to Si. C. C. using a stepwise gradient (CHCl<sub>3</sub>-MeOH-H<sub>2</sub>O 75:30:2 → 30:15:1 → 30:18:1 → 30:20:1 → 6:4:1 → MeOH) to give 3 fractions (Fr. Hb4-2d-2a: 247.3 mg, Fr. Hb4-2d-2b: 202.3 mg, Fr. Hb4-2d-2c: 195.8 mg). Fr. Hb4-2d-2b (202.3 mg) was further separated by ODS C. C. using a stepwise gradient (MeCN-

H<sub>2</sub>O 20:80 → 30:70 → 40:60 → MeOH) to afford oleanolic acid 3-*O*-β-D-xylopyranosyl-(1→2)-α-L-rhamnopyranosyl-(1→3)-β-D-glucuronopyranosyl-28-*O*-β-D-glucopyranoside (**6**, 72.0 mg, 0.011%, Fr. Hb4-2d-2b-9).

Fr. Hb2 (853.5 mg) was subjected to ODS C. C. using a stepwise gradient (MeOH-H<sub>2</sub>O 30:70 → 40:60 → 50:50 → 60:40 → 70:30 → 90:10 → MeOH) to afford 4 fractions (Fr. Hb2-1: 77.2 mg, Fr. Hb2-2: 86.5 mg, Fr. Hb2-3: 79.9 mg, Fr. Hb2-5: 86.6 mg) and oleanolic acid 3-*O*-α-L-rhamnopyranosyl-(1→3)-β-D-glucuronopyranosyl-28-*O*-β-D-glucopyranoside (**8**, 440.3 mg, 0.069%, Fr. Hb2-4).

Fr. Hb2-2 (86.5 mg) was subjected to Si. C. C. using a stepwise gradient (CHCl<sub>3</sub>-MeOH-H<sub>2</sub>O 75:30:2 → 30:15:1 → 30:18:1 → 30:20:1 → 6:4:1 → MeOH) to afford cochalinoside C (**5**, 27.5 mg, 0.004%, Fr. Hb2-2e).

The 100% MeOH-eluted fraction (94.5 g) was subjected to Si. C. C. using a stepwise gradient (CHCl<sub>3</sub>-MeOH-H<sub>2</sub>O 60:14:1 → 75:25:2 → 75:30:2 → 30:15:1 → 30:18:1 → 30:20:1 → 6:4:1 → MeOH) to give 8 fractions (Fr. 1: 105.7 mg, Fr. 2: 199.3 mg, Fr. 3: 1.0 g, Fr. 4: 1.9 g, Fr. 5: 15.9 g, Fr. 6: 11.5 g, Fr. 7: 1.1 g, Fr. 8: 6.1 g). Fr. 4 (1.9 g) was subjected to ODS C. C. using a stepwise gradient (MeCN-H<sub>2</sub>O 20:80 → 30:70 → 40:60 → 50:50 → 60:40 → MeOH) to give 3 fractions (Fr. 4A: 690.1 mg, Fr. 4B: 1.2 g, Fr. 4C: 501.6 mg). Fr. 4B (1.2 g) was subjected to Si. C. C. using a stepwise gradient (CHCl<sub>3</sub>-

MeOH-H<sub>2</sub>O 75:30:2 → 30:15:1 → 30:18:1 → 30:20:1 → 6:4:1 → MeOH) to afford oleanolic acid 3-*O*- $\alpha$ -L-rhamnopyranosyl-(1→3)-6'-*O*-methyl- $\beta$ -D-glucuronopyranosyl-28-*O*- $\beta$ -D-glucopyranoside (**9**, 40.5 mg, 0.006%, Fr. 4B-2).

Fr. 5 (15.9 g) was subjected to Si. C. C. using a stepwise gradient (CHCl<sub>3</sub>-MeOH-H<sub>2</sub>O 30:12:1 → 20:10:1 → 20:15:1 → 6:4:1 → MeOH) to give 6 fractions (Fr. 5A: 49.1 mg, Fr. 5B: 186.1 mg, Fr. 5C: 211.0 mg, Fr. 5D: 391.3 mg, Fr. 5E: 300.8 mg, Fr. 5F: 604.5 mg). Fr. 5-E (300.8 mg) was subjected to ODS C. C. using a stepwise gradient (MeOH-H<sub>2</sub>O 70:30 → 80:20 → 90:10 → MeOH) to give 2 fractions (Fr. 5E-1: 235.2 mg, Fr. 5E-2: 336.4mg). Fr. 5E-1 (235.2 mg) was partially (46.0 mg) subjected to ODS C. C. using a stepwise gradient (MeCN-H<sub>2</sub>O 30:70 → 40:60 → 50:50 → MeOH) to afford longispinoside A (**2**, 16.0 mg, 0.003%, Fr. 5E-1e).

Fr. 5B (186.1 mg) was subjected to ODS C. C. using a stepwise gradient (MeCN-H<sub>2</sub>O 40:60 → 50:50 → 60:40 → 70:30 → MeOH) to give 3 fractions (Fr. 5B-1: 8.1 mg, Fr. 5B-2: 51.4 mg, Fr. 5-B-3: 26.5 mg). Fr. 5B-2 (51.4 mg) was subjected to ODS C. C. using a stepwise gradient (MeOH-H<sub>2</sub>O 60:40 → 70:30 → 80:20 → 90:10 → MeOH) to afford longispinoside A methyl ester (**3**, 24.2 mg, 0.004%, Fr. 5B-2c).

Fr. 5D (391.3 mg) was subjected to ODS C. C. using a stepwise gradient (MeOH-H<sub>2</sub>O 70:30 → 80:20 → 90:10 → MeOH) to give 3 fractions (Fr. 5D-1: 22.2 mg, Fr. 5D-2: 54.3

mg, Fr. 5D-3: 191.0 mg). Fr. 5D-2 (54.3 mg) was subjected to ODS C. C. using a stepwise gradient (MeOH-H<sub>2</sub>O 80:20 → 90:10 → MeOH) to give 2 fractions (Fr. 5D-2a: 1.1 mg, Fr. 5D-2b: 40.3 mg). Fr. 5D-2b (40.3 mg) was subjected to ODS C. C. using a stepwise gradient (MeCN-H<sub>2</sub>O 60:40 → MeOH) to afford erythronoside A methyl ester (**4**, 9.3 mg, 0.001%, Fr. 5D-2b-6).

Fr. 8 (6.1 g) was subjected to Si. C. C. using a stepwise gradient (CHCl<sub>3</sub>-MeOH-H<sub>2</sub>O 25:12:1 → 15:12:1 → 13:12:1 → MeOH) to give 2 fractions (Fr. 8A: 28.9 mg, Fr. 8B: 1.6 g). Fr. 8B (1.6 g) was subjected to ODS C. C. using a stepwise gradient (MeOH-H<sub>2</sub>O 30:70 → 50:50 → MeOH) to afford stenoside A (**7**, 28.9 mg, 0.005%, Fr. 8B-3).



**Table 1.**  $^1\text{H}$ - and  $^{13}\text{C}$ -NMR spectroscopic data for compounds **6** (500 MHz for  $^1\text{H}$  and 125 MHz for  $^{13}\text{C}$ , in DMSO- $d_6$ ).

| Position | 6                    |                                               |
|----------|----------------------|-----------------------------------------------|
| 1        | 38.1 CH <sub>2</sub> | $\alpha$ 0.86 (o)<br>$\beta$ 1.47 (o)         |
| 2        | 25.6 CH <sub>2</sub> | $\alpha$ 1.70 (brd, 10.6)<br>$\beta$ 1.52 (o) |
| 3        | 88.9 CH              | 3.01 (dd, 10.6, 3.8)                          |
| 4        | 38.8 C               |                                               |
| 5        | 55.0 CH              | 0.67 (o)                                      |
| 6        | 17.8 CH <sub>2</sub> | $\alpha$ 1.43 (o)<br>$\beta$ 1.27 (t, 12.0)   |
| 7        | 32.3 CH <sub>2</sub> | $\alpha$ 1.35 (o)<br>$\beta$ 1.19 (o)         |
| 8        | 39.0 C               |                                               |
| 9        | 47.1 CH              | 1.45 (o)                                      |
| 10       | 36.3 C               |                                               |
| 11       | 23.0 CH <sub>2</sub> | 1.76 (brs)                                    |
| 12       | 121.7 CH             | 5.14 (brs)                                    |
| 13       | 143.5 C              |                                               |
| 14       | 41.3 C               |                                               |
| 15       | 27.2 CH <sub>2</sub> | $\alpha$ 0.93 (o)<br>$\beta$ 1.70 (brt, 10.4) |
| 16       | 22.5 CH <sub>2</sub> | $\alpha$ 1.92 (brt, 10.4)<br>$\beta$ 1.57 (o) |
| 17       | 46.0 C               |                                               |
| 18       | 40.8 CH              | 2.72 (dd, 13.4, 3.0)                          |
| 19       | 45.6 CH <sub>2</sub> | $\alpha$ 1.60 (t, 13.4)<br>$\beta$ 1.05 (o)   |
| 20       | 30.3 C               |                                               |
| 21       | 33.3 CH <sub>2</sub> | $\alpha$ 1.32 (o)<br>$\beta$ 1.13 (brd, 9.6)  |
| 22       | 31.6 CH <sub>2</sub> | $\alpha$ 1.57 (o)<br>$\beta$ 1.47 (o)         |
| 23       | 27.3 CH <sub>3</sub> | 0.94 (s)                                      |
| 24       | 15.9 CH <sub>3</sub> | 0.72 (s)                                      |
| 25       | 15.2 CH <sub>3</sub> | 0.83 (s)                                      |
| 26       | 16.7 CH <sub>3</sub> | 0.66 (s)                                      |
| 27       | 25.4 CH <sub>3</sub> | 1.05 (s)                                      |
| 28       | 175.3 C              |                                               |
| 29       | 32.8 CH <sub>3</sub> | 0.86 (s)                                      |
| 30       | 23.4 CH <sub>3</sub> | 0.85 (s)                                      |
|          | GlcA                 | GlcA                                          |
| 1'       | 103.4 CH             | 4.41 (d, 8.0)                                 |
| 2'       | 77.5 CH              | 3.47 (t, 8.0)                                 |
| 3'       | 82.3 CH              | 3.53 (t, 8.0)                                 |
| 4'       | 70.2 CH              | 3.44 (o)                                      |
| 5'       | 75.0 CH              | 3.69 (d, 9.7)                                 |
| 6'       | 170.3 C              |                                               |
|          | Xyl                  | Xyl                                           |
| 1"       | 102.8 CH             | 4.35 (d, 7.7)                                 |
| 2"       | 74.0 CH              | 2.93 (o)                                      |
| 3"       | 76.6 CH              | 3.07 (o)                                      |
| 4"       | 69.7 CH              | 3.21 (o)                                      |
| 5"       | 65.8 CH <sub>2</sub> | $\alpha$ 2.96 (t, 11.9)<br>$\beta$ 3.61 (o)   |
|          | Rha                  | Rha                                           |
| 1'''     | 101.0 CH             | 4.93 (d, brs)                                 |
| 2'''     | 70.6 CH              | 3.77 (o)                                      |
| 3'''     | 70.6 CH              | 3.44 (o)                                      |
| 4'''     | 72.0 CH              | 3.19 (o)                                      |
| 5'''     | 68.7 CH              | 3.79 (o)                                      |
| 6'''     | 17.8 CH <sub>3</sub> | 1.07 (d, 6.0)                                 |
|          | Glc                  | Glc                                           |
| 1''''    | 94.1 CH              | 5.22 (d, 8.2)                                 |
| 2''''    | 72.4 CH              | 3.08 (o)                                      |
| 3''''    | 76.7 CH              | 3.19 (o)                                      |
| 4''''    | 69.6 CH              | 3.11 (o)                                      |
| 5''''    | 77.7 CH              | 3.12 (o)                                      |
| 6''''    | 60.7 CH <sub>2</sub> | 3.42 (o)<br>3.60 (o)                          |

**Figure 1.** HMBC, COSY, and Key NOESY Correlations of **3**.

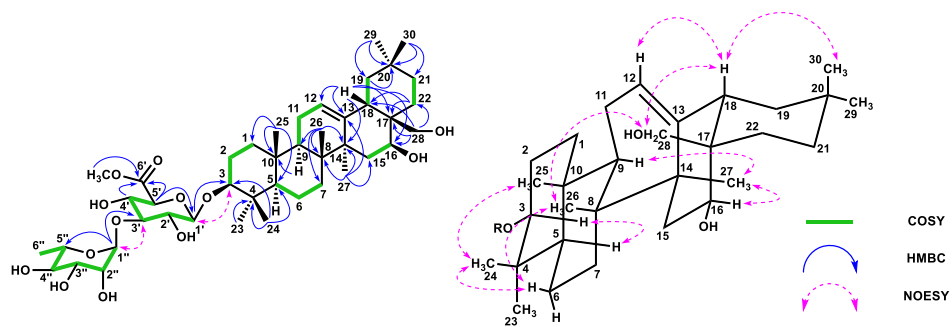

**Figure 2.** HMBC, COSY, and Key NOESY Correlations of **6**.

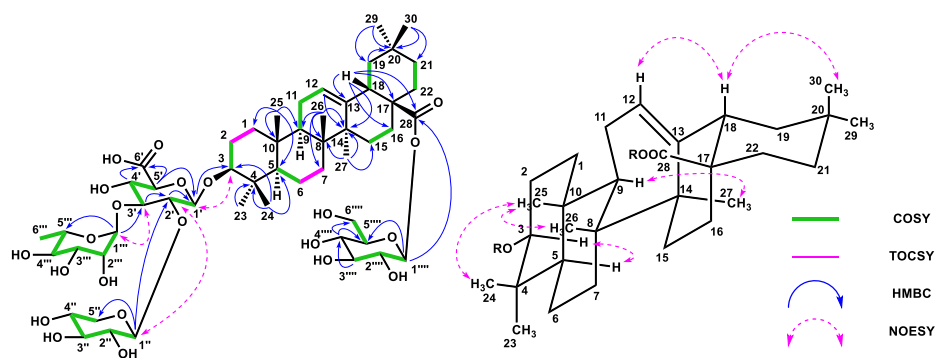

**Figure 3.** HMBC, COSY, and Key NOESY Correlations of **7**.

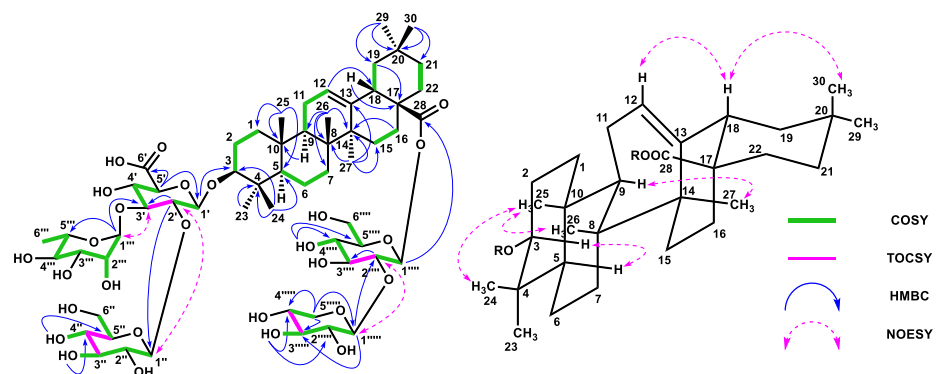

**Figure 4.**  $^1\text{H}$  NMR spectrum (500 MHz) of chichipenoside D (**1**) in  $\text{DMSO-}d_6$ .

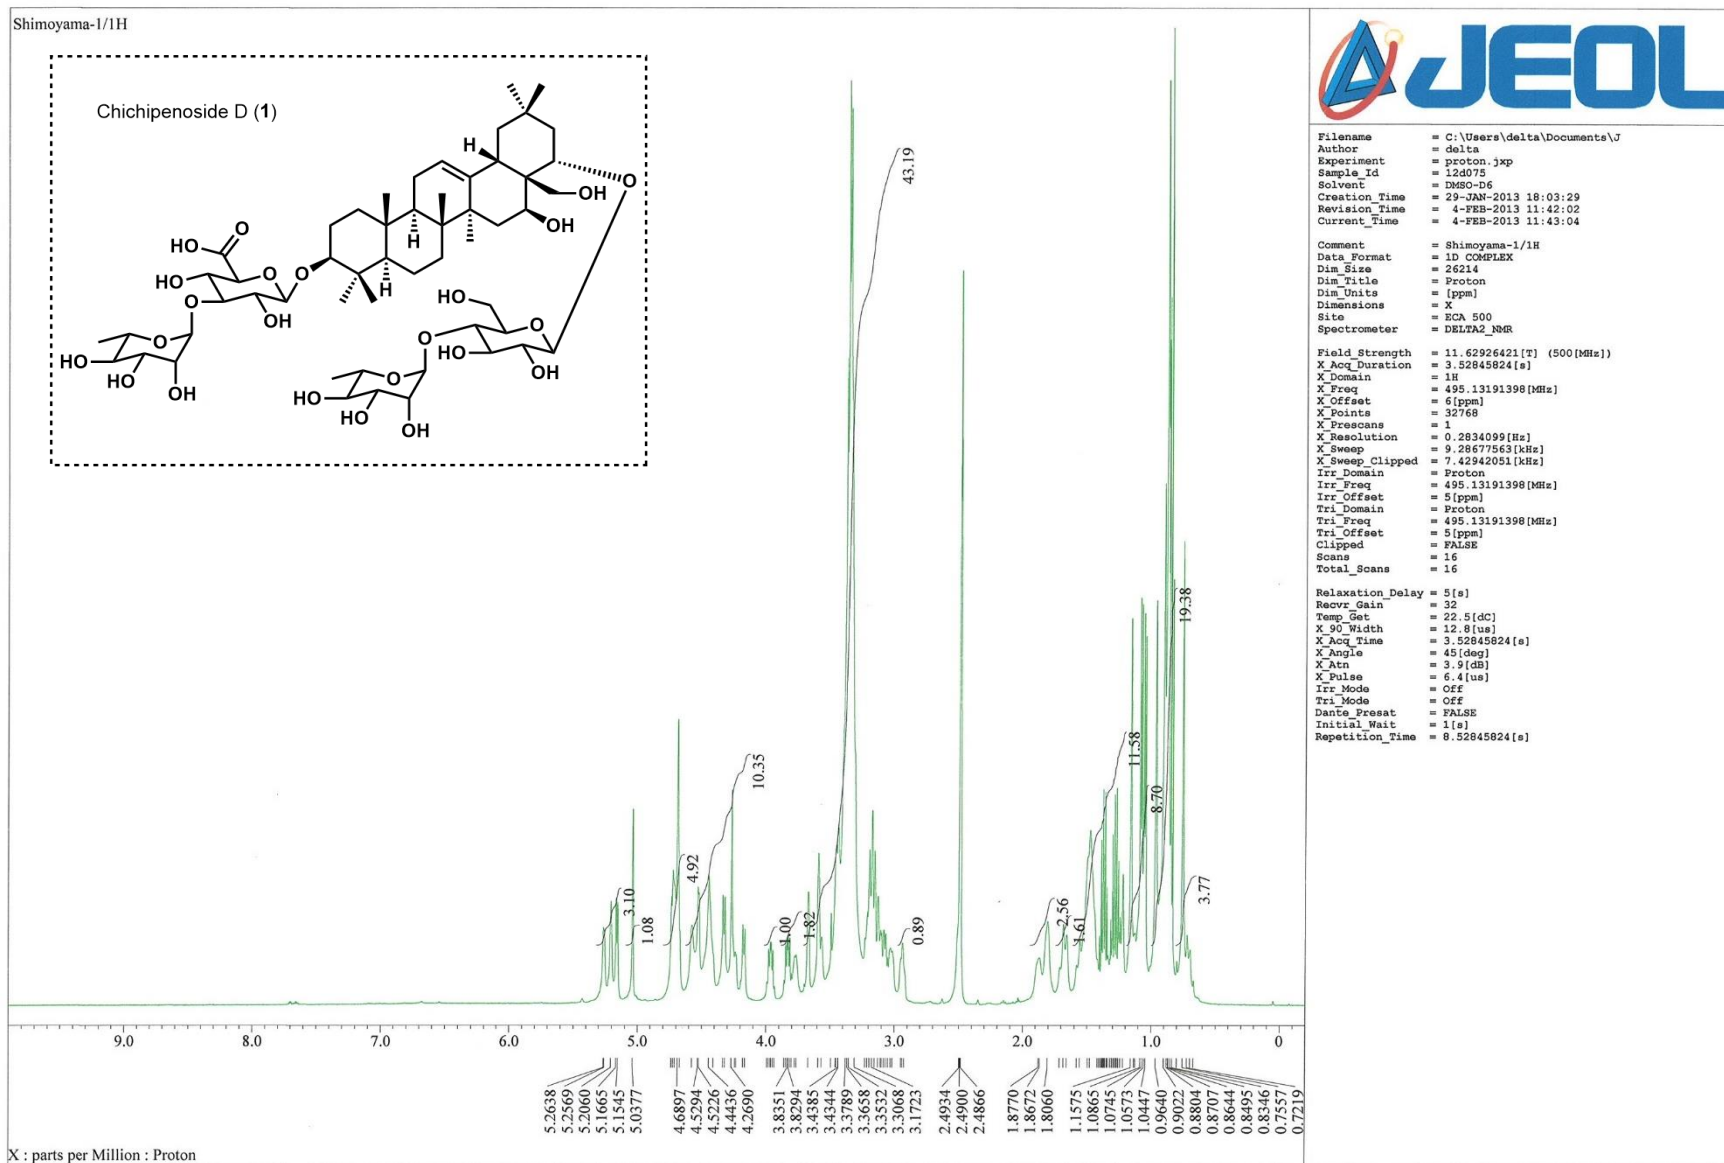

**Figure 5.**  $^{13}\text{C}$  NMR spectrum (125 MHz) of chichipenoside D (**1**) in  $\text{DMSO-}d_6$ .

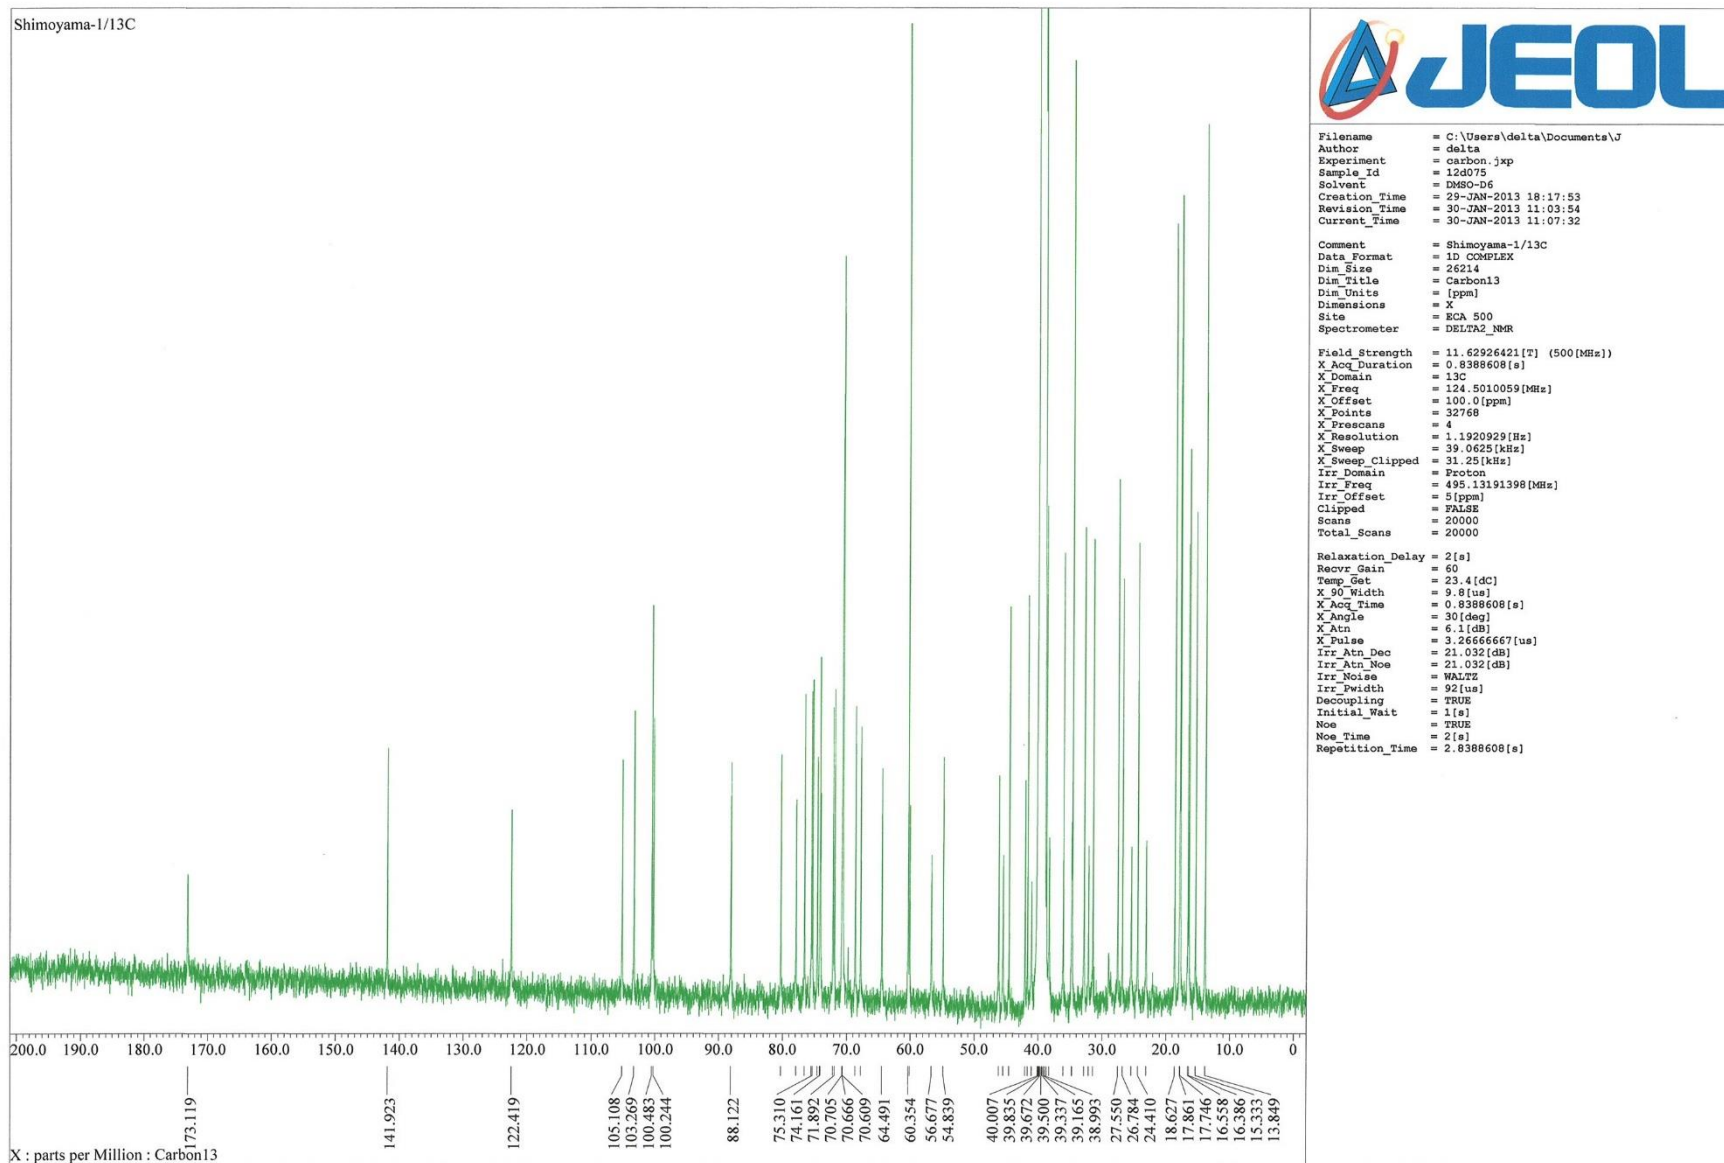

Figure 6. DEPT 90 and 135 pulse NMR spectra of chichipenoside D (1) in DMSO-*d*<sub>6</sub>.

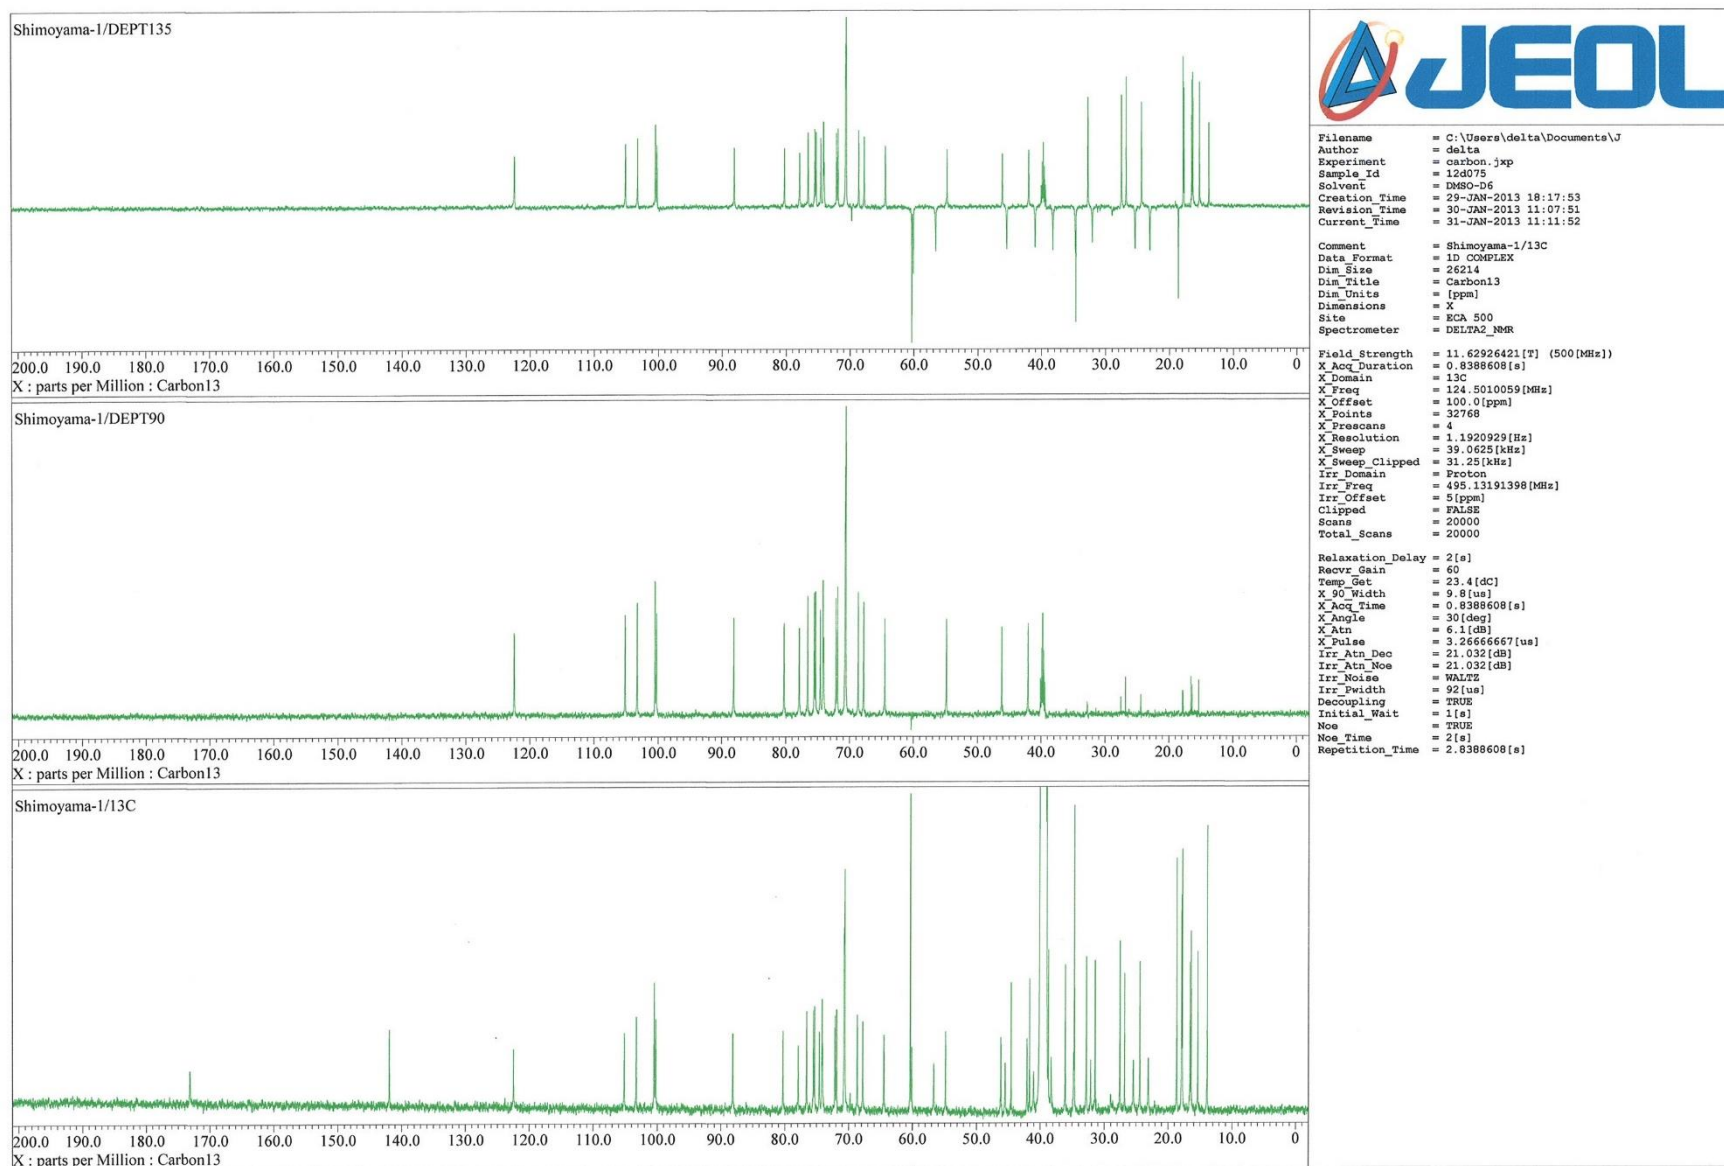

Figure 7. DQF-COSY spectrum of chichipenoside D (1) in DMSO-*d*<sub>6</sub>.

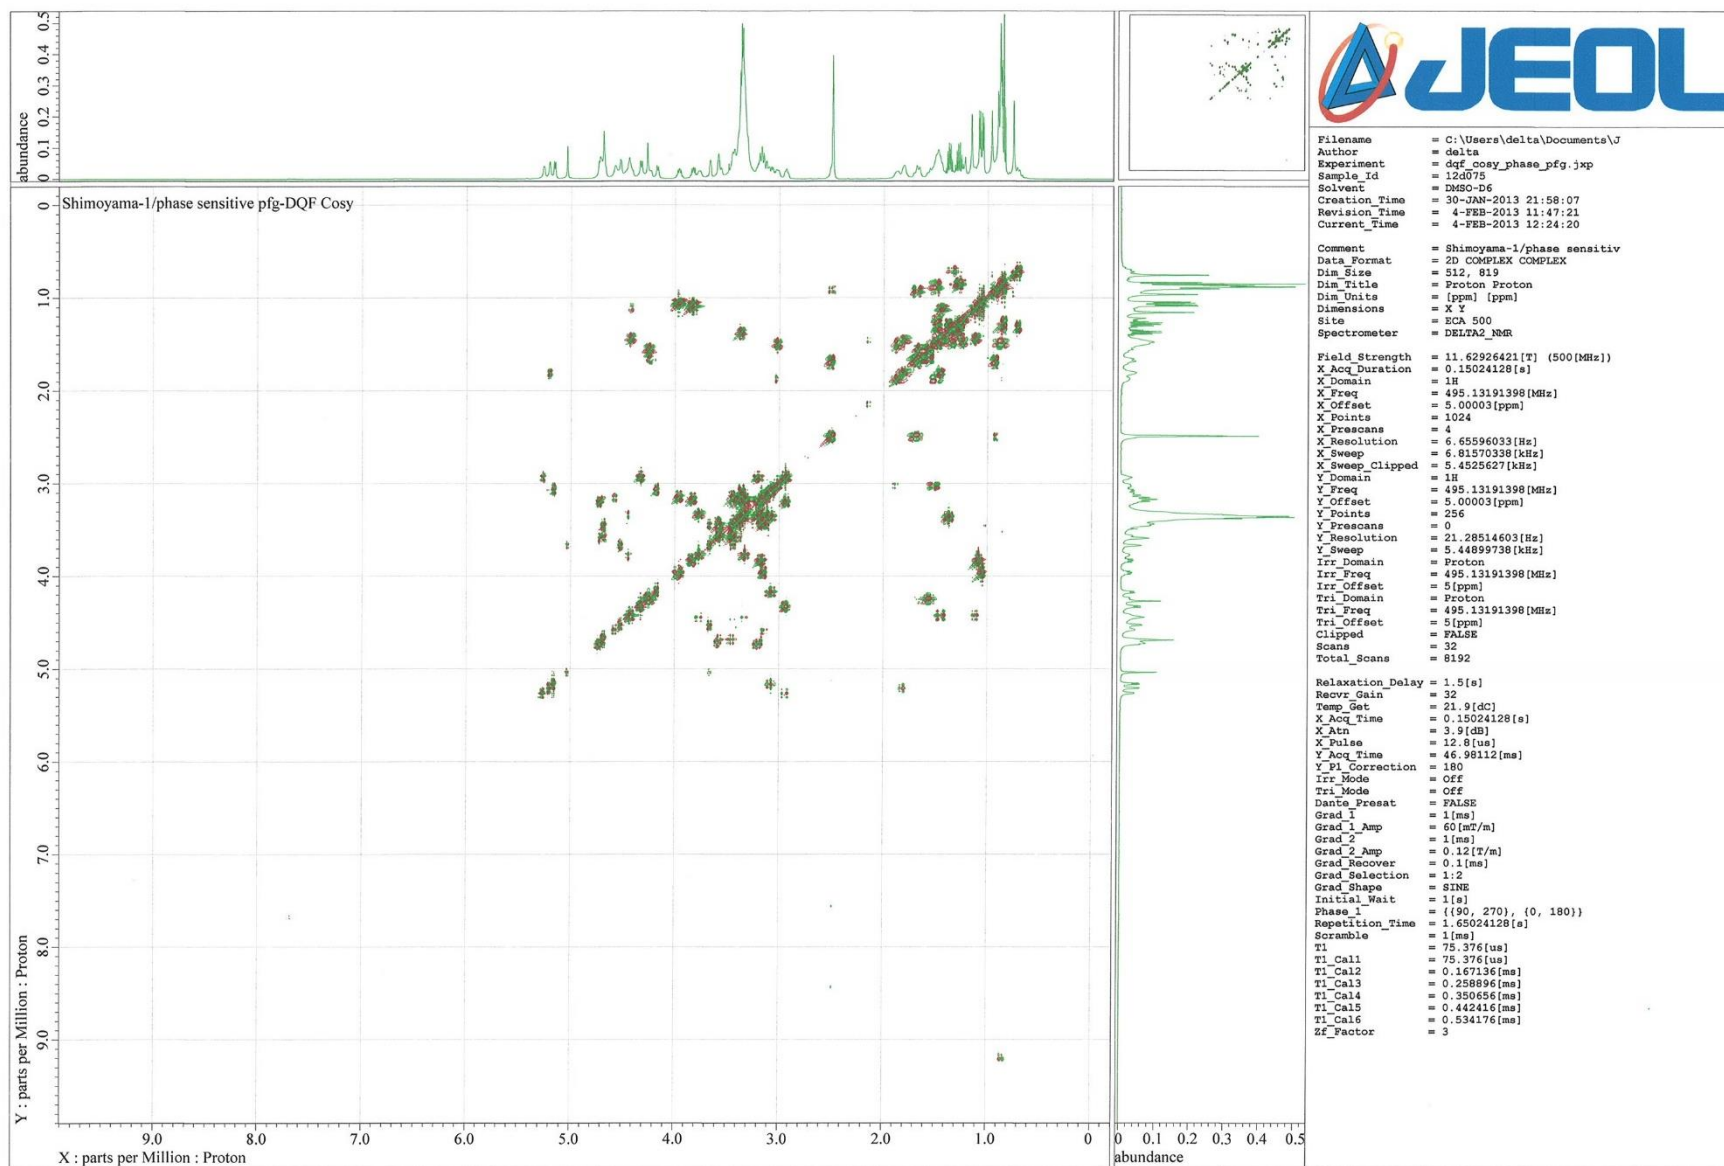

**Figure 8.** HMQC spectrum of chichipenoside D (**1**) in DMSO-*d*<sub>6</sub>.

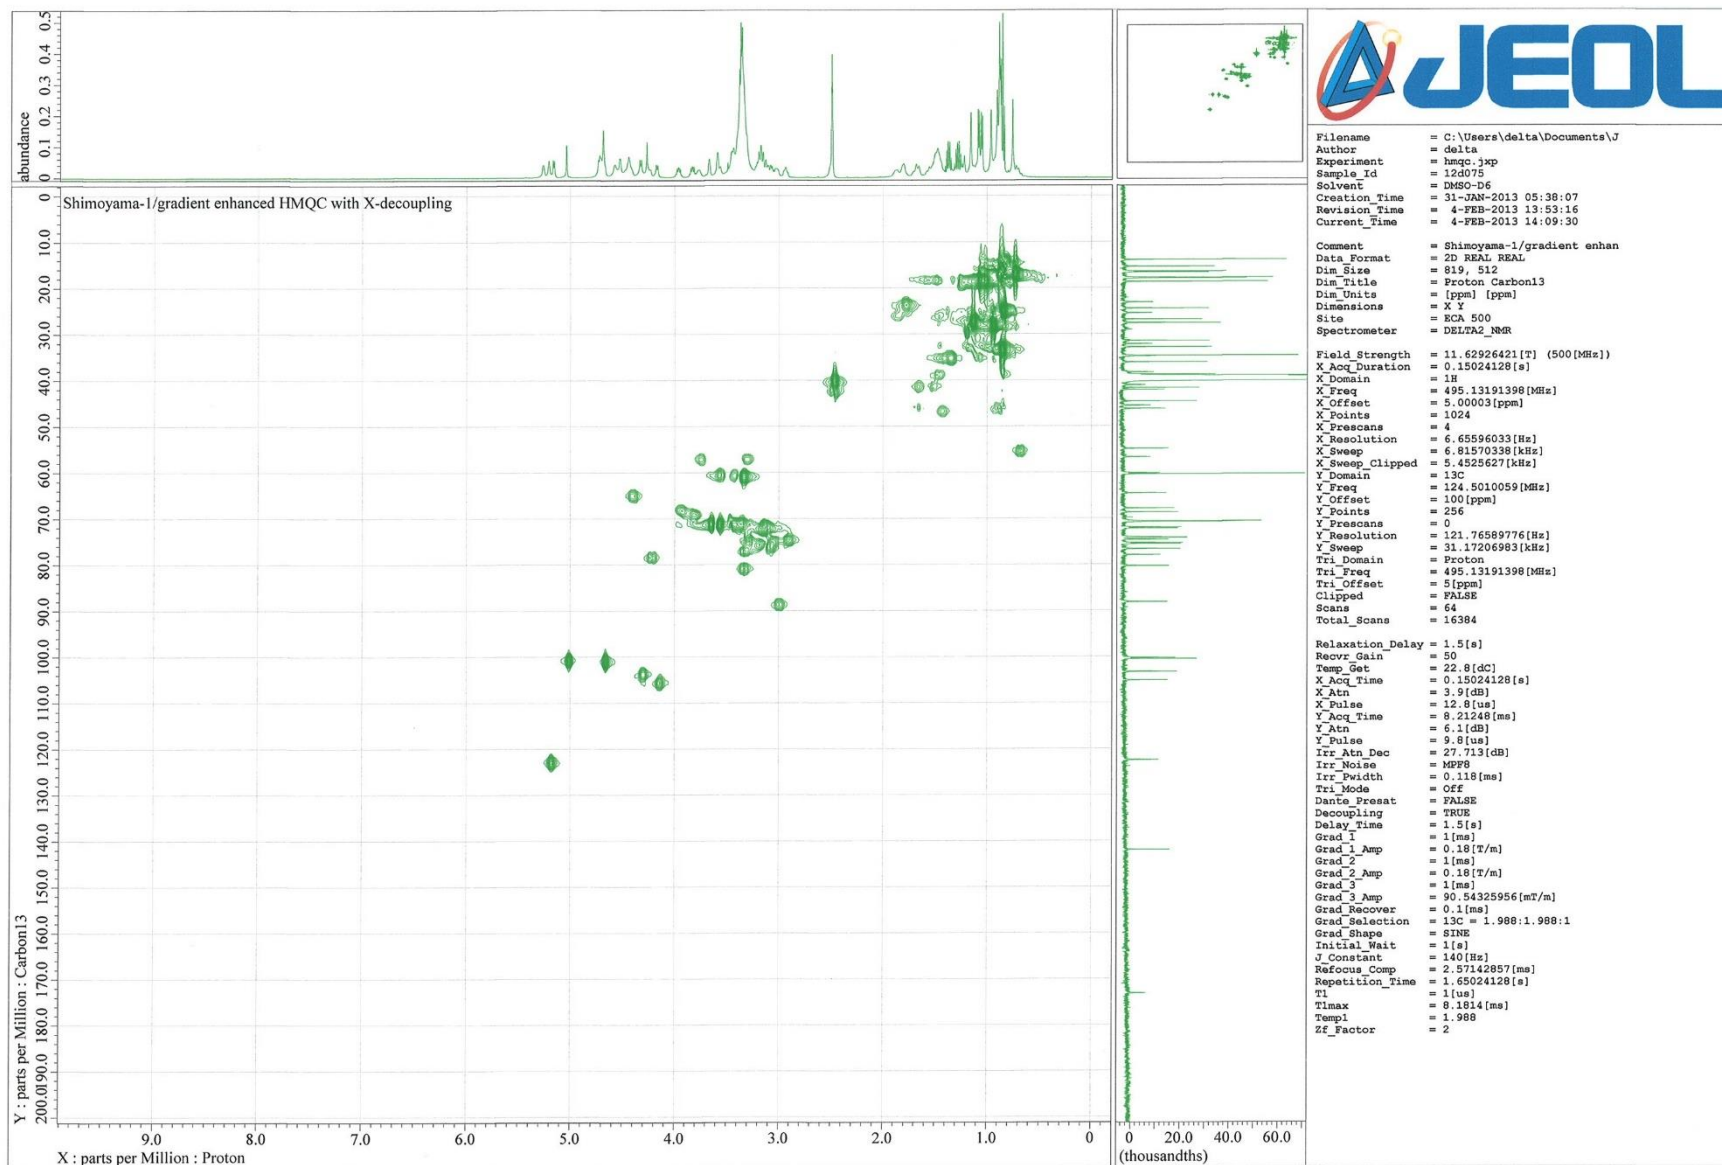

Figure 9. HMBC spectrum of chichipenoside D (1) in DMSO-*d*<sub>6</sub>.

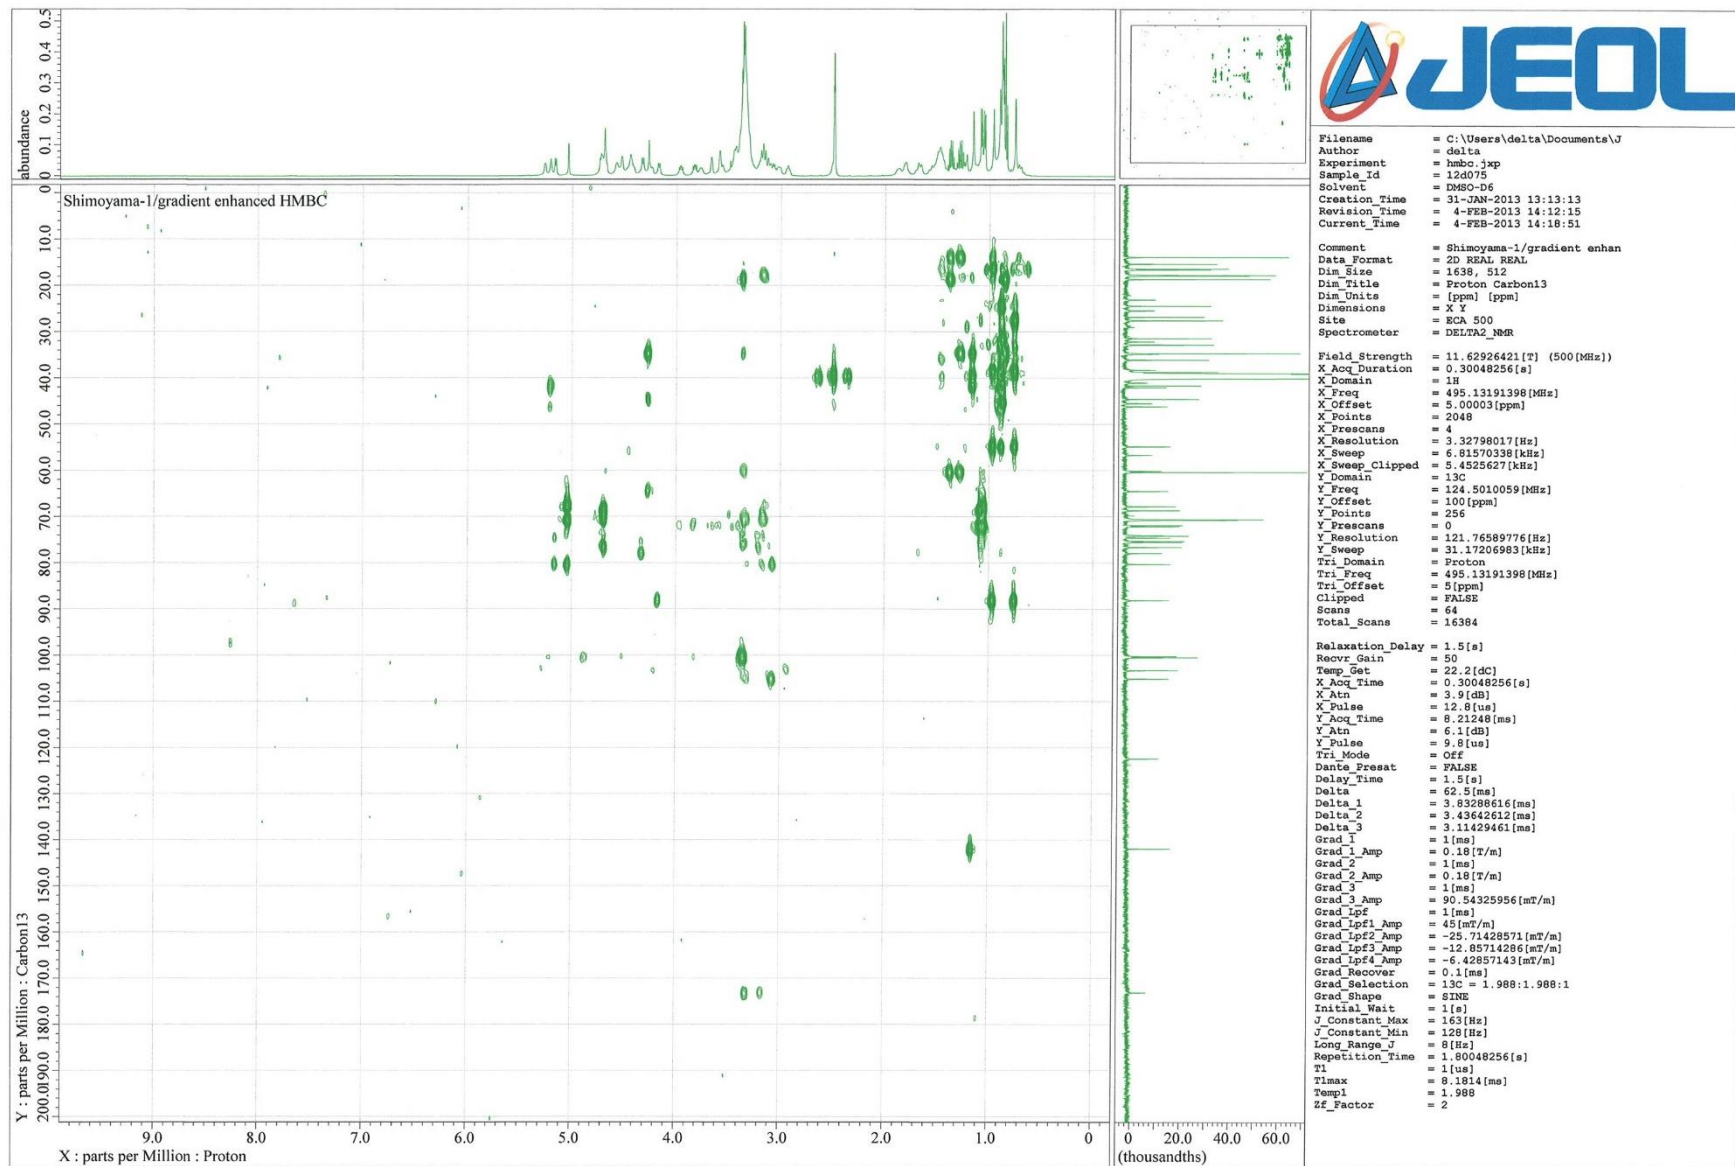



Figure 10. HSQC-TOCSY spectrum of chichipenoside D (1) in DMSO-*d*<sub>6</sub>.

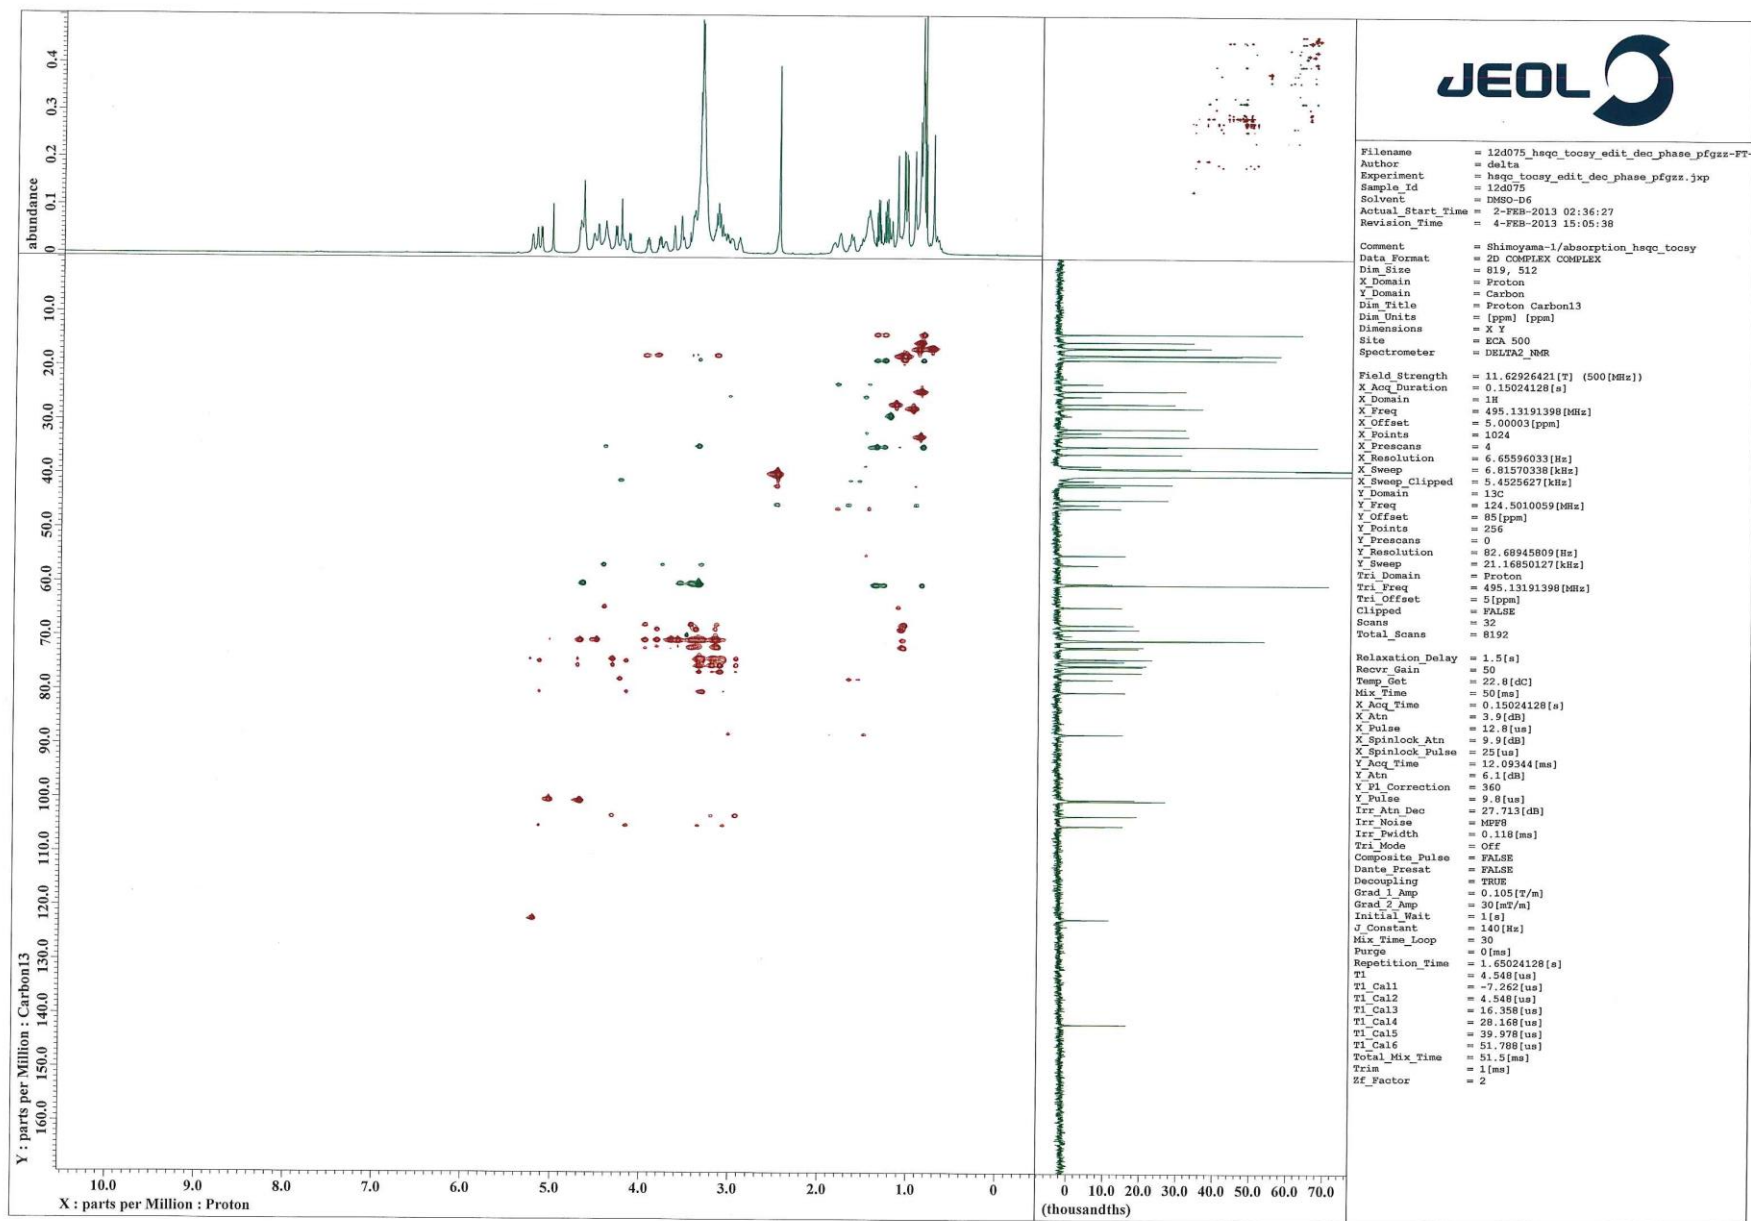

Figure 11. pfg-TOCSY spectrum of chichipenoside D (1) in DMSO-*d*<sub>6</sub>.

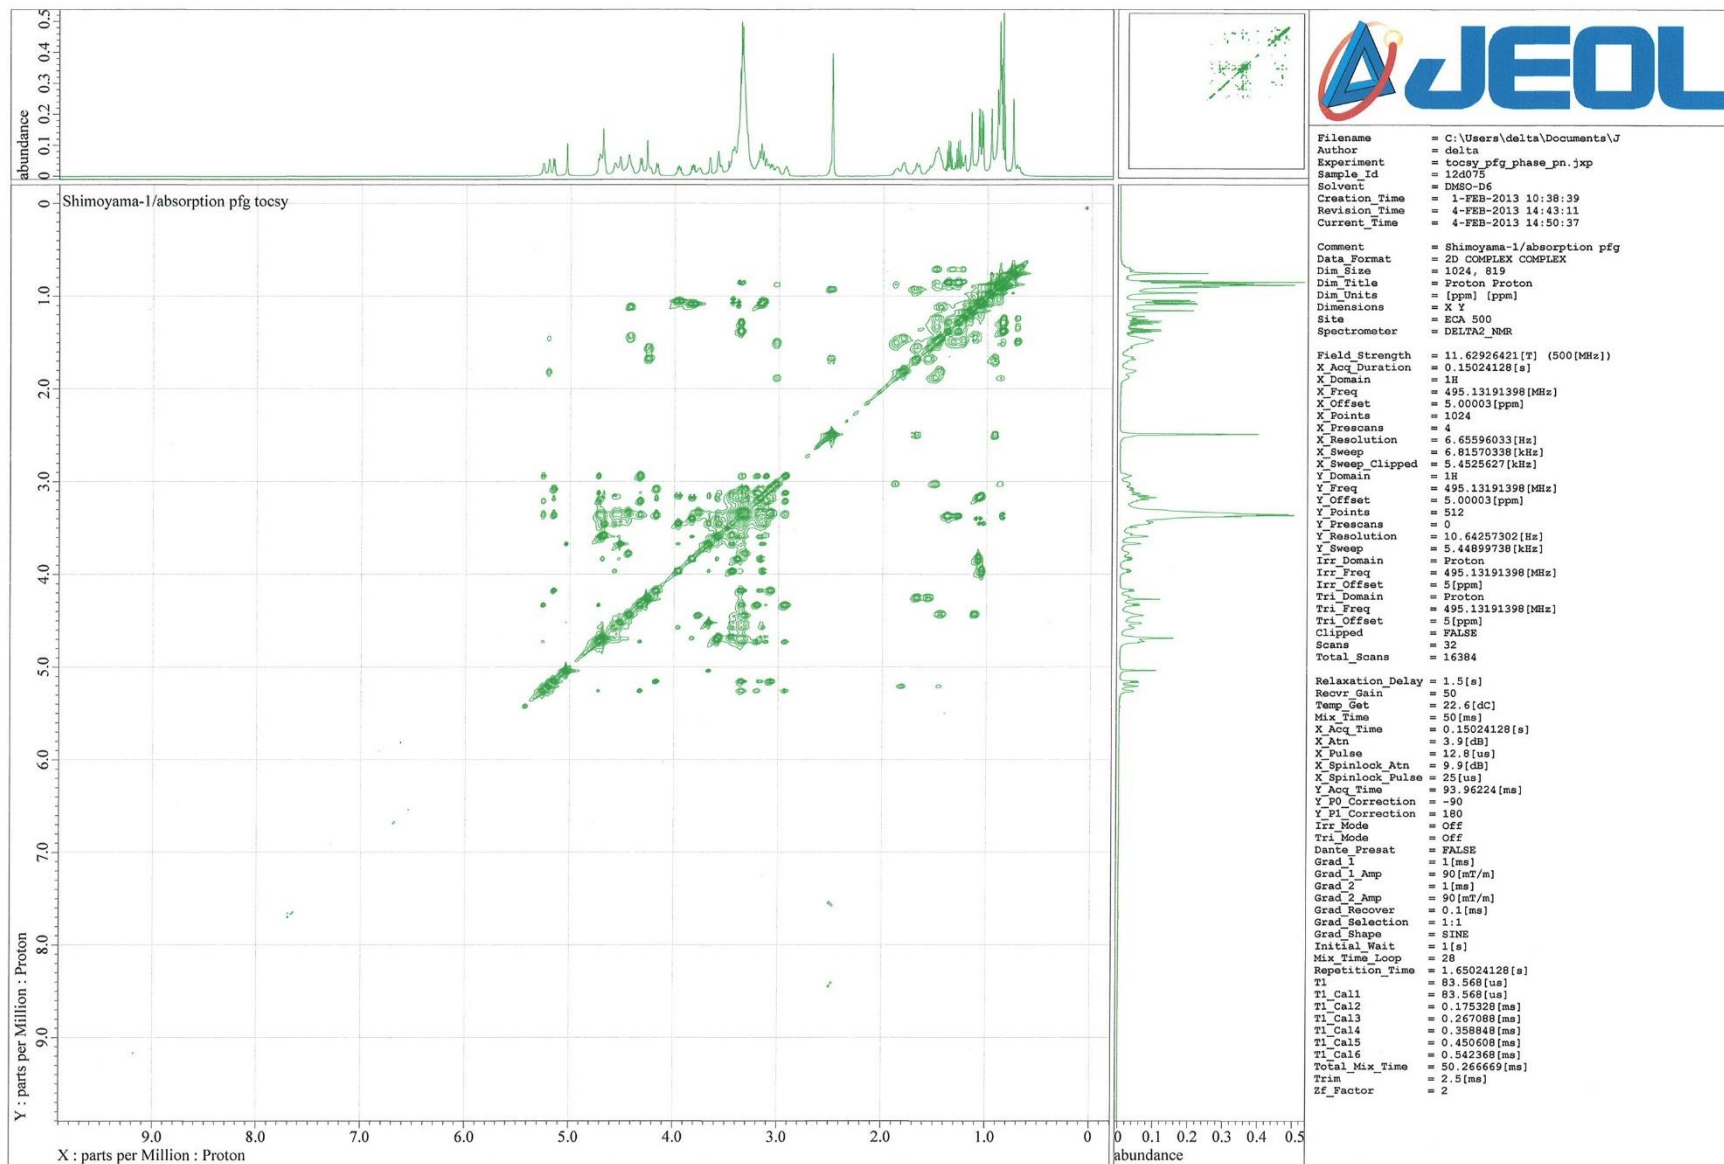

Figure 12. NOESY spectrum of chichipenoside D (1) in DMSO-*d*<sub>6</sub>.

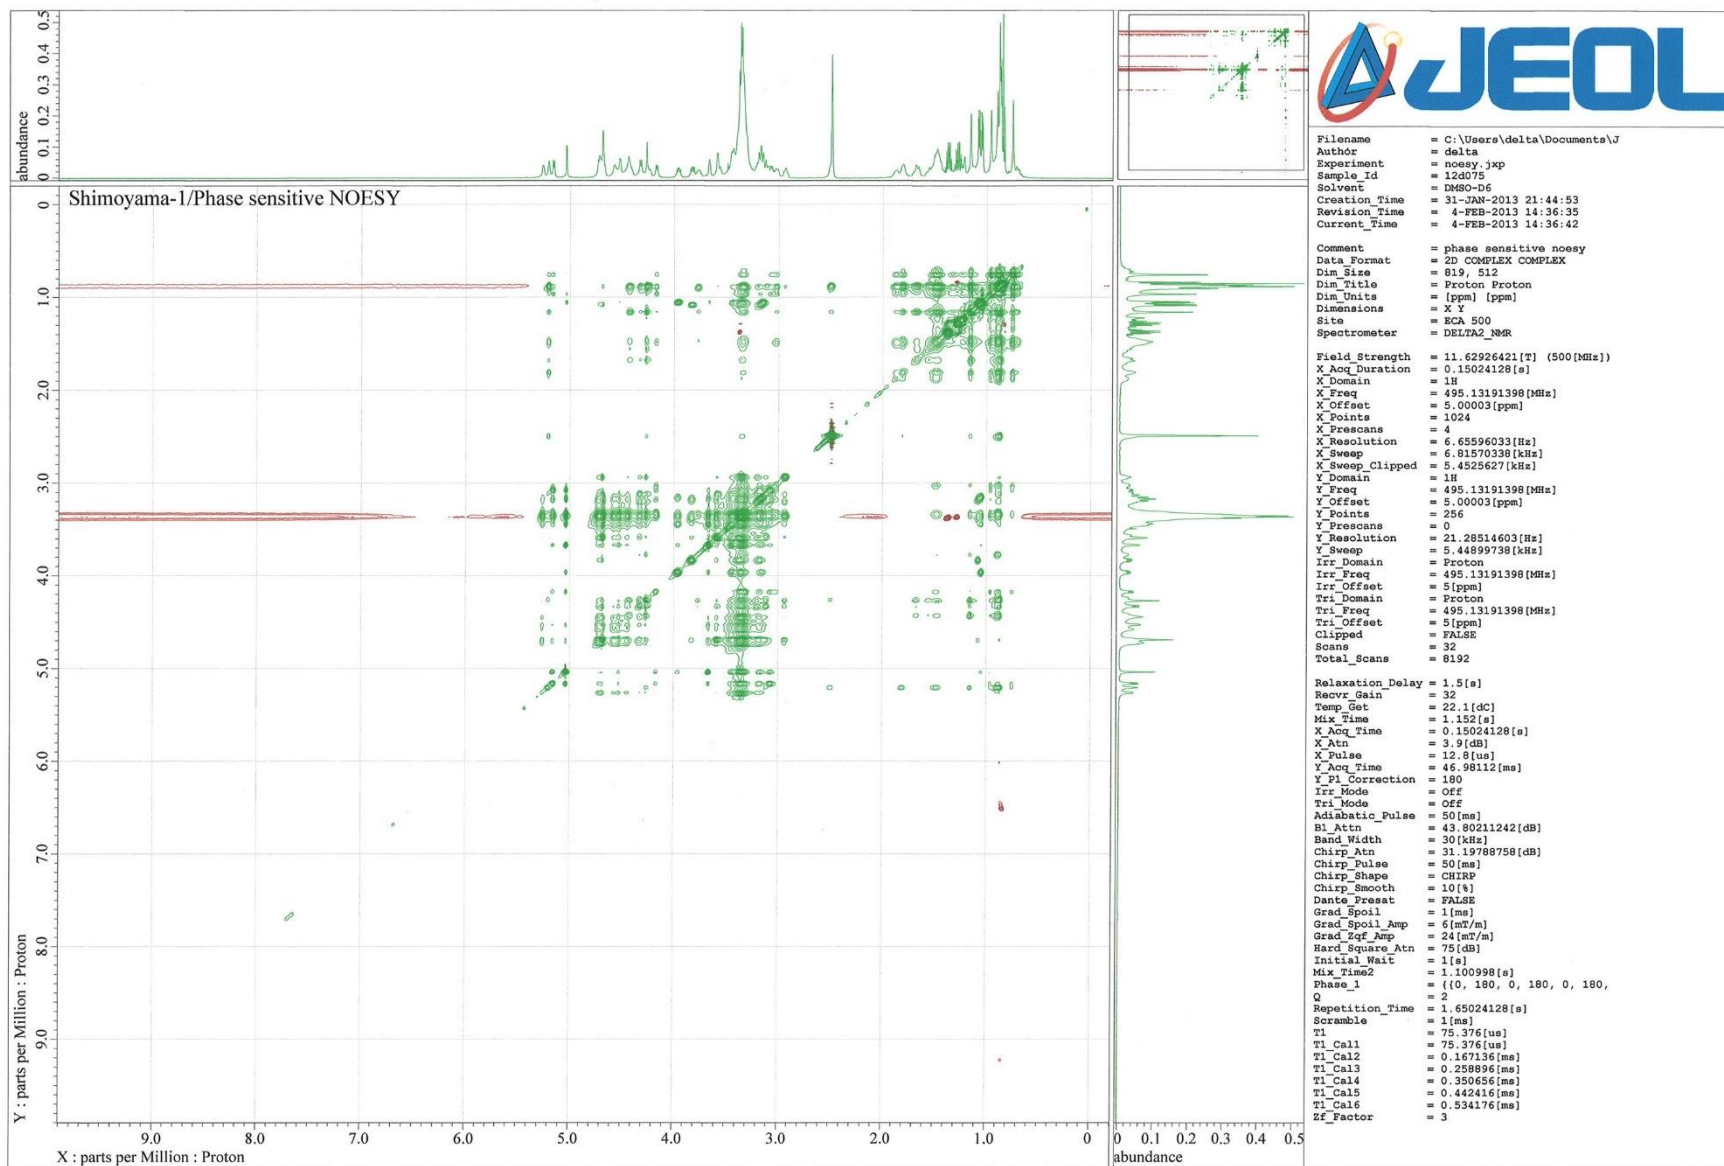

Figure 13.  $^1\text{H}$  NMR spectrum (500 MHz) of longispinoside A (2) in  $\text{DMSO-}d_6$ .

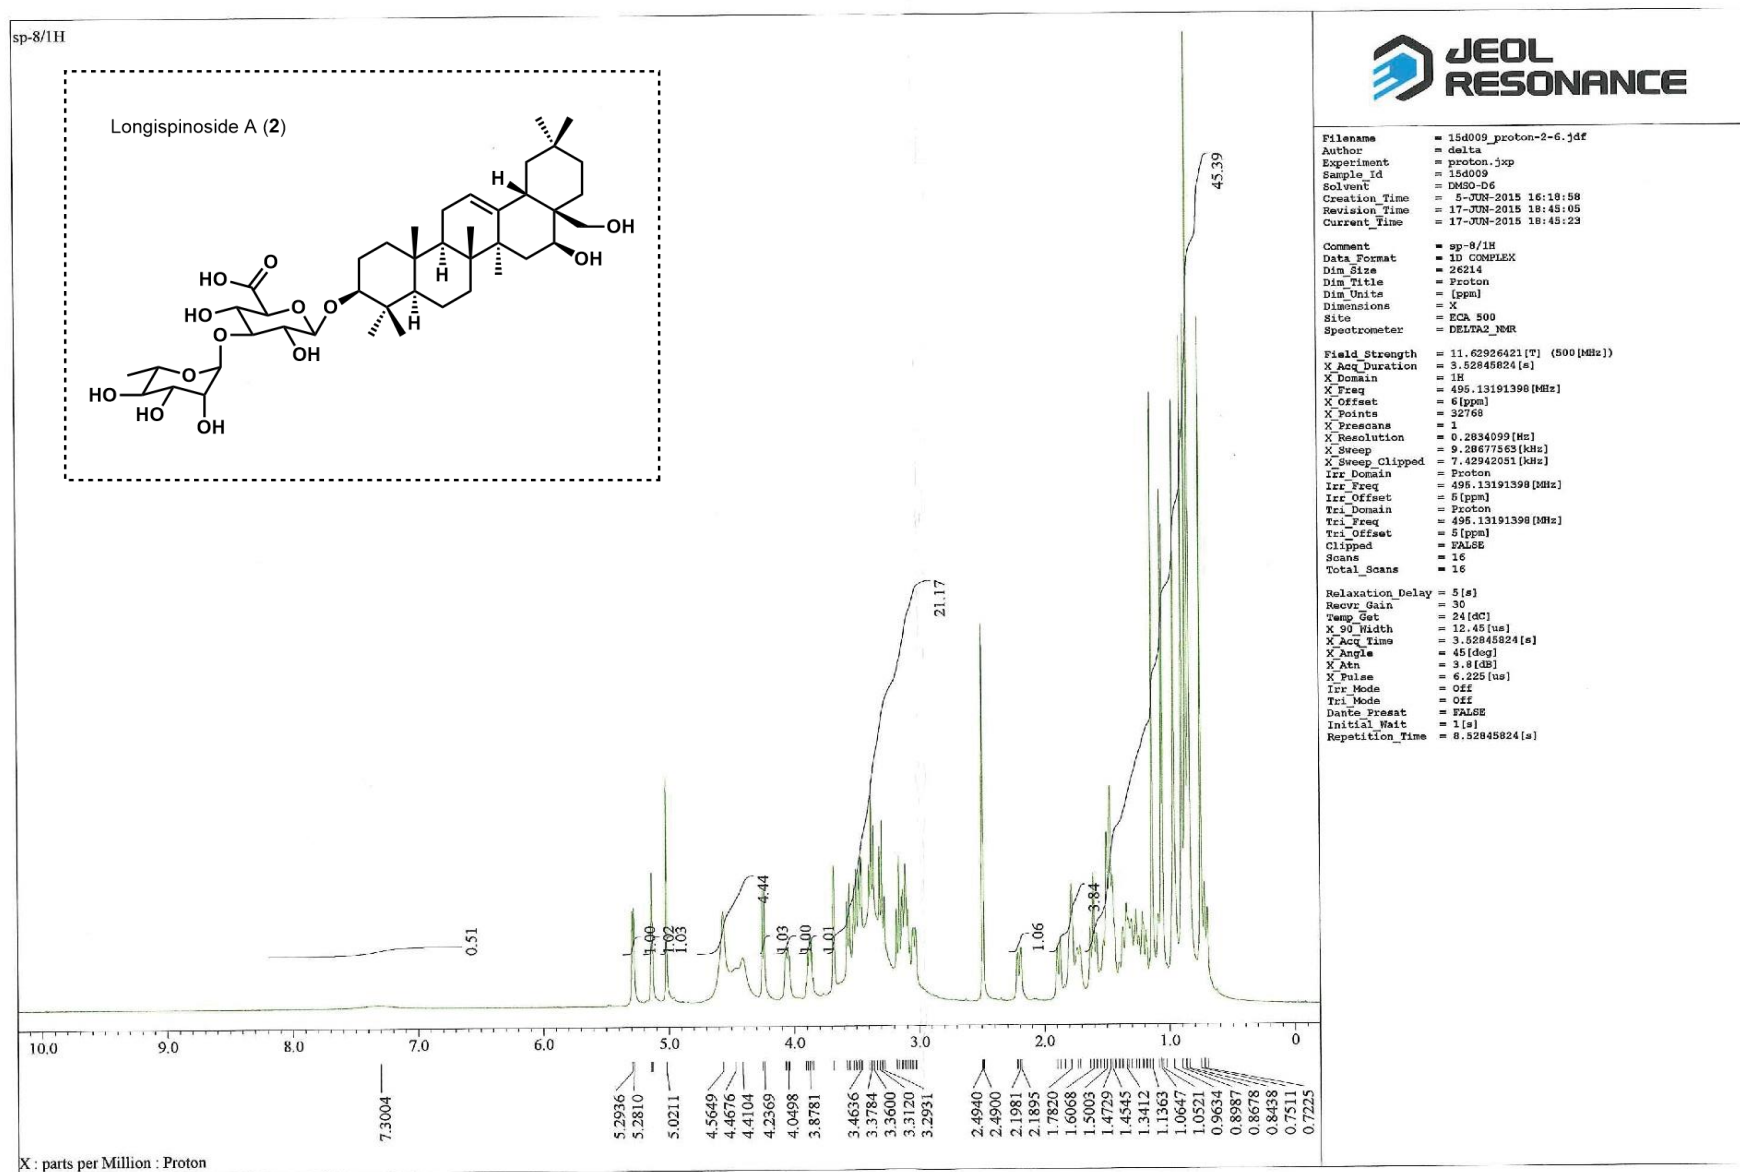

Figure 14.  $^{13}\text{C}$  NMR spectrum (125 MHz) of longispinoside A (2) in DMSO- $d_6$ .

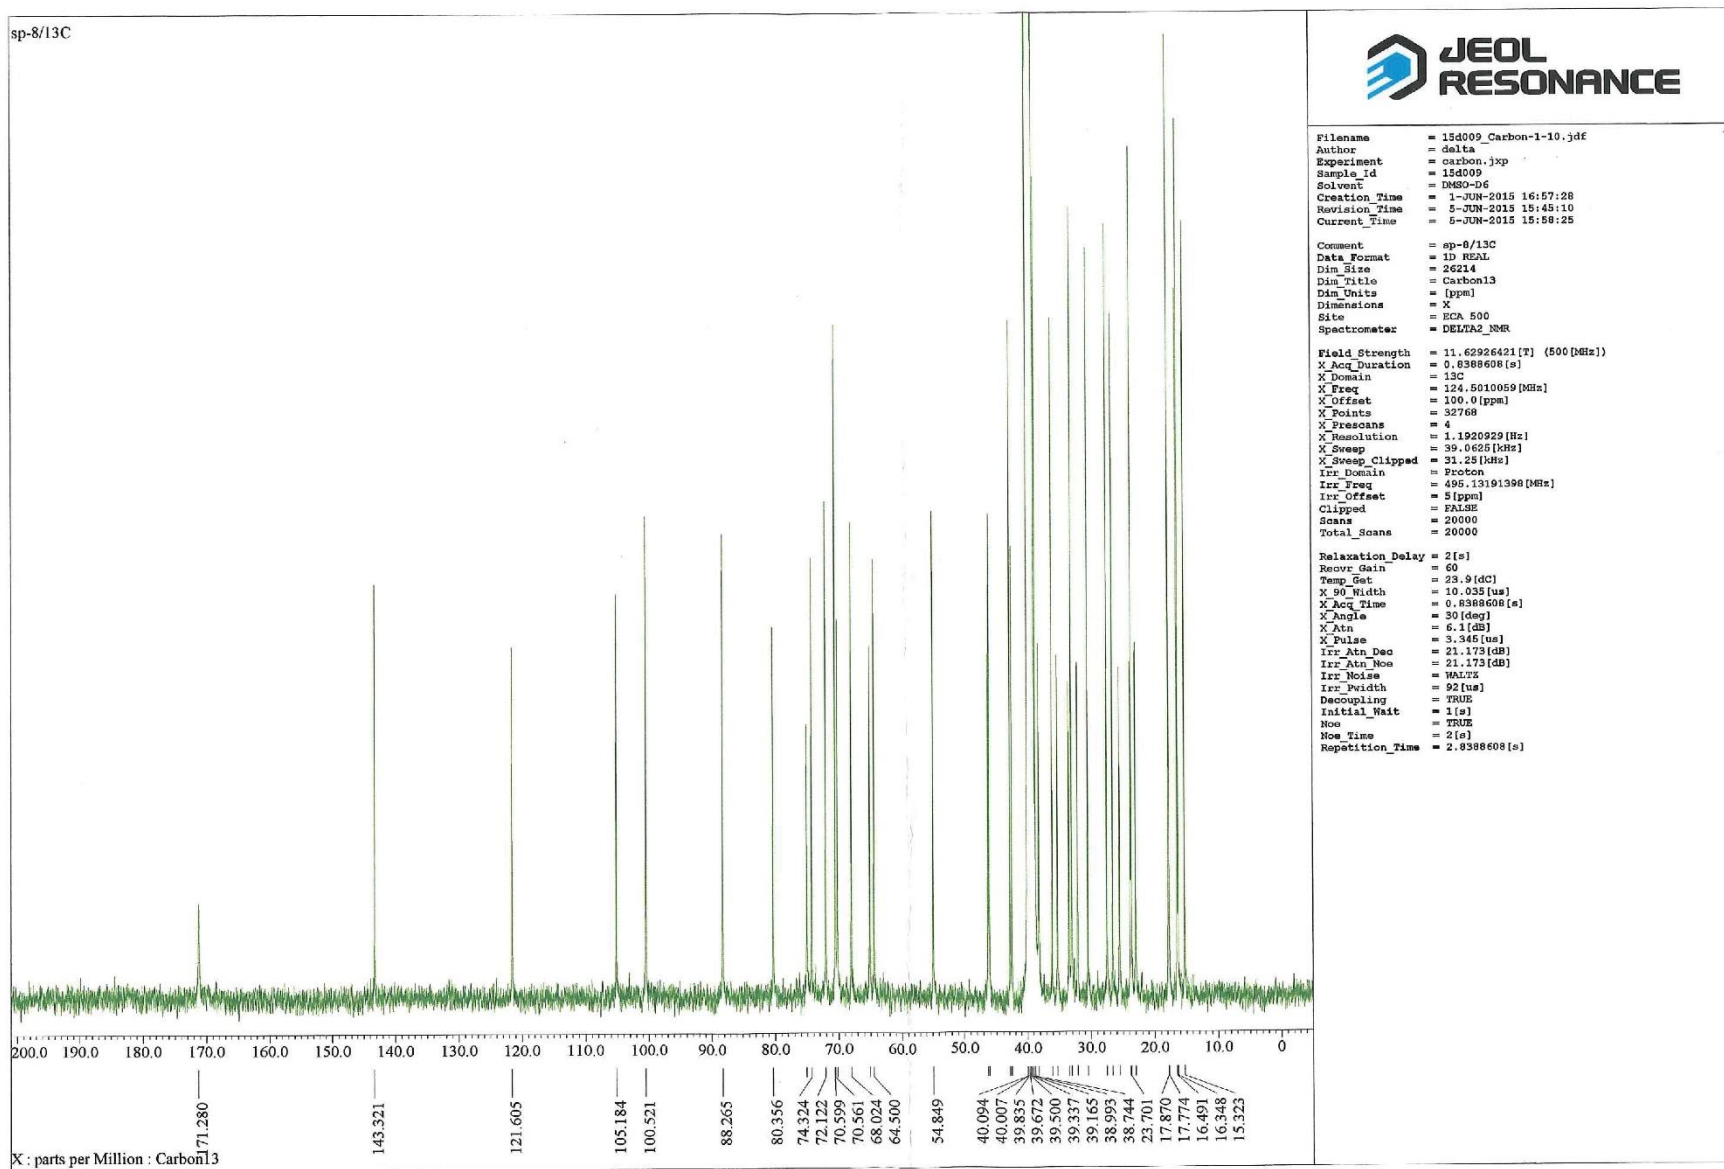

Figure 15. DEPT 90 and 135 pulse NMR spectra of longispinoside A (2) in DMSO-*d*<sub>6</sub>.

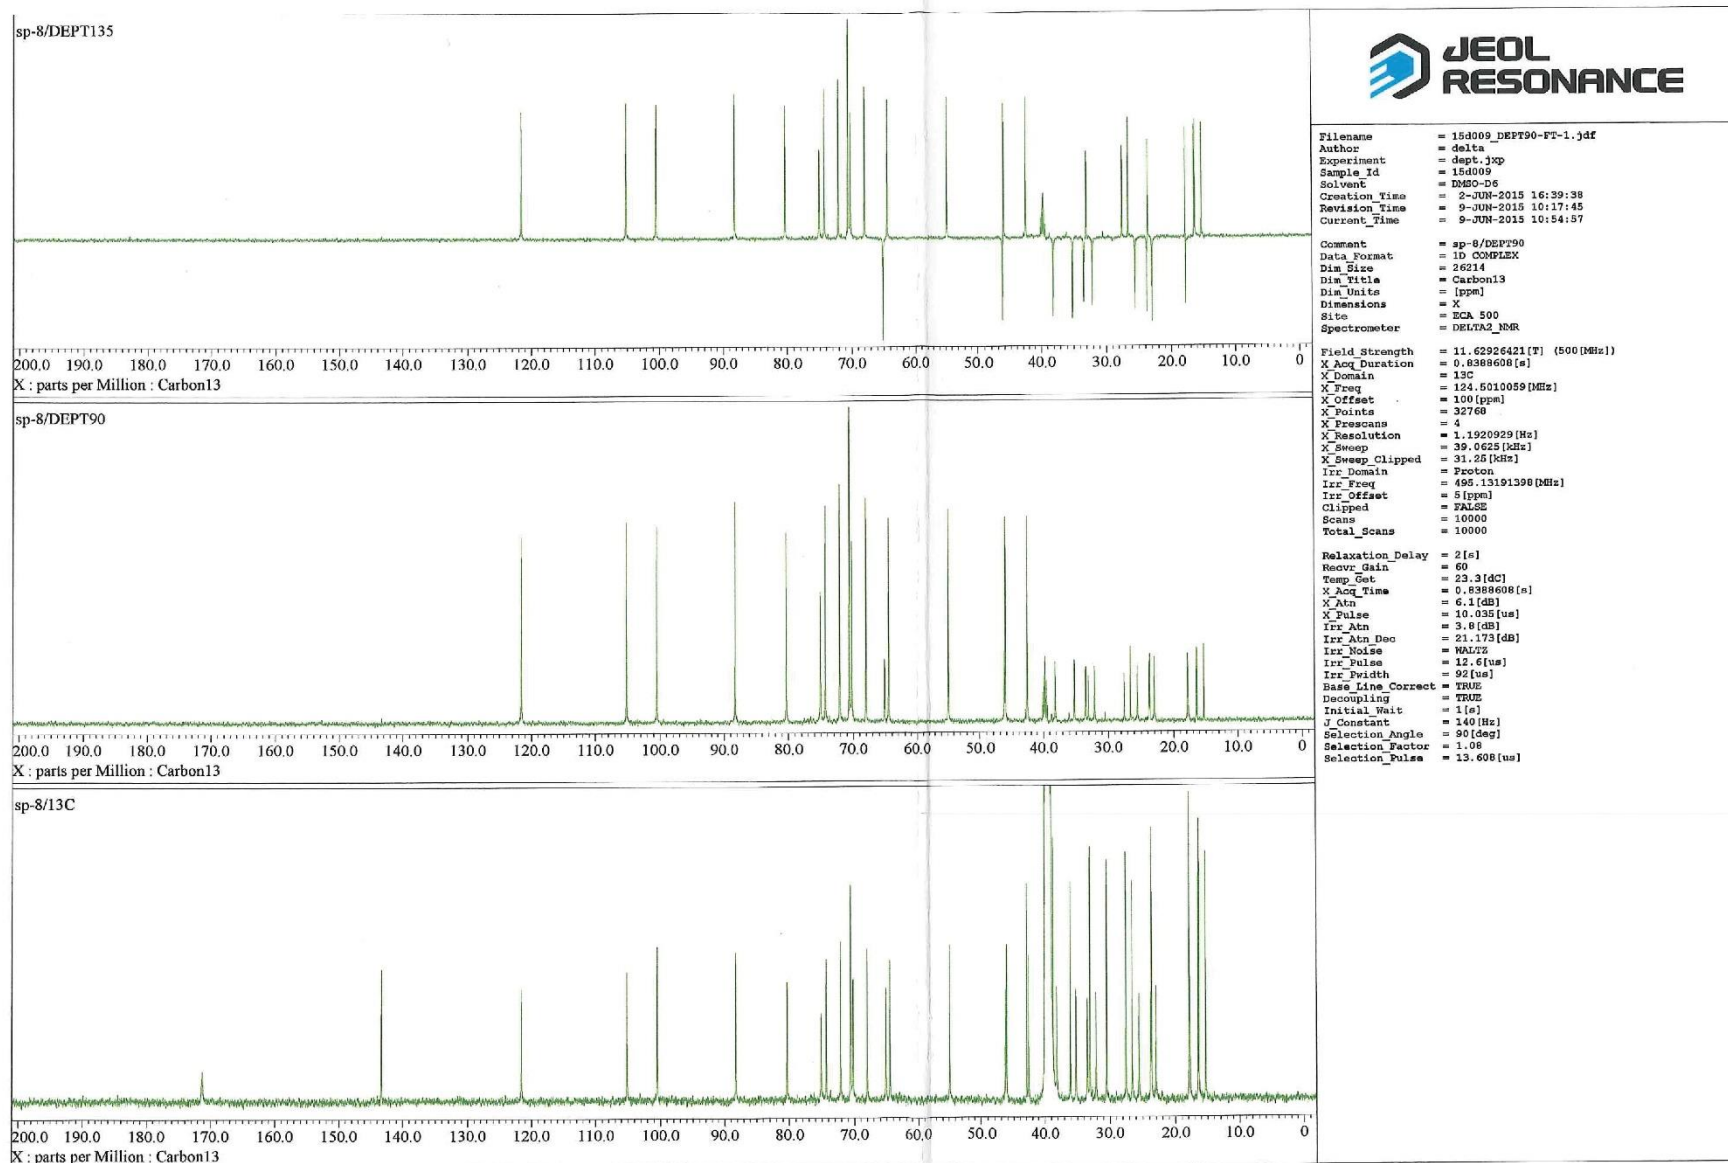

Figure 16. DQF-COSY spectrum of longispinoside A (2) in DMSO-*d*<sub>6</sub>.

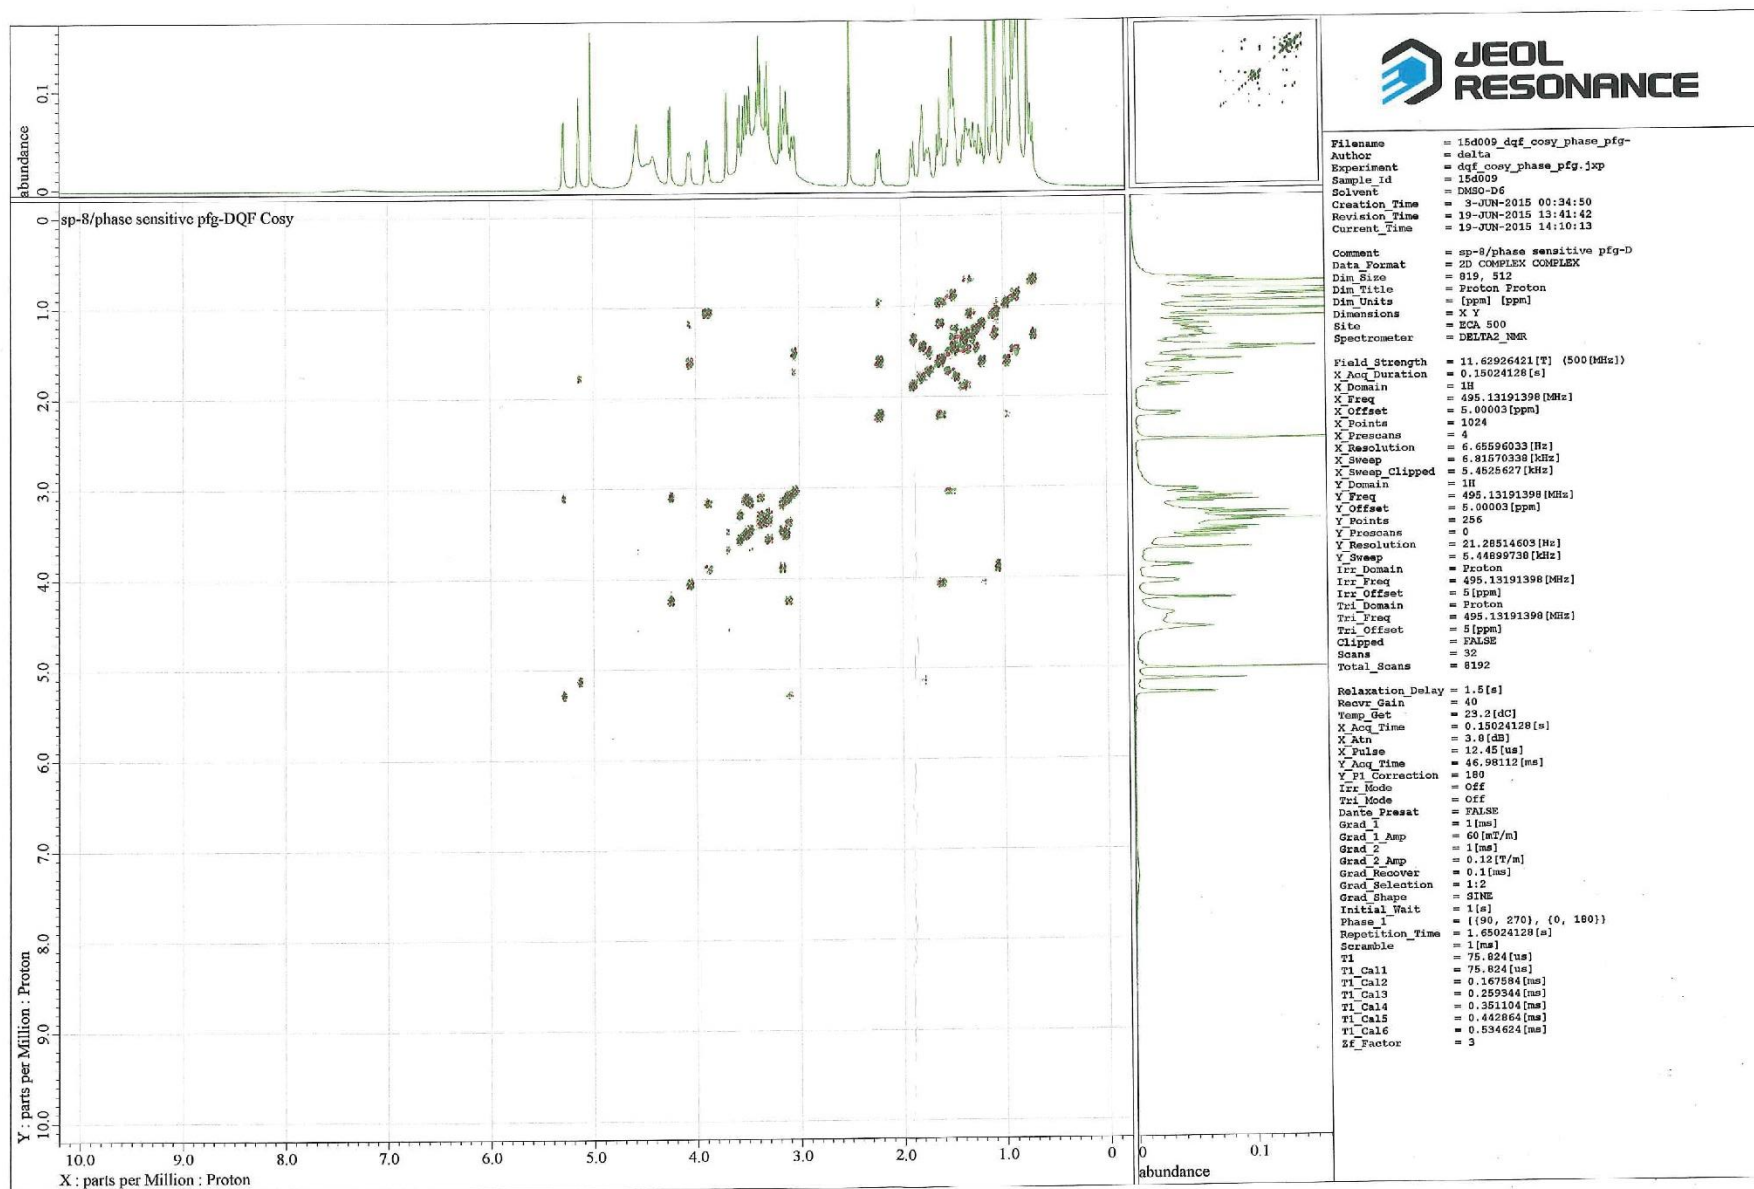

Figure 17. HMQC spectrum of longispinoside A (2) in DMSO-*d*<sub>6</sub>.

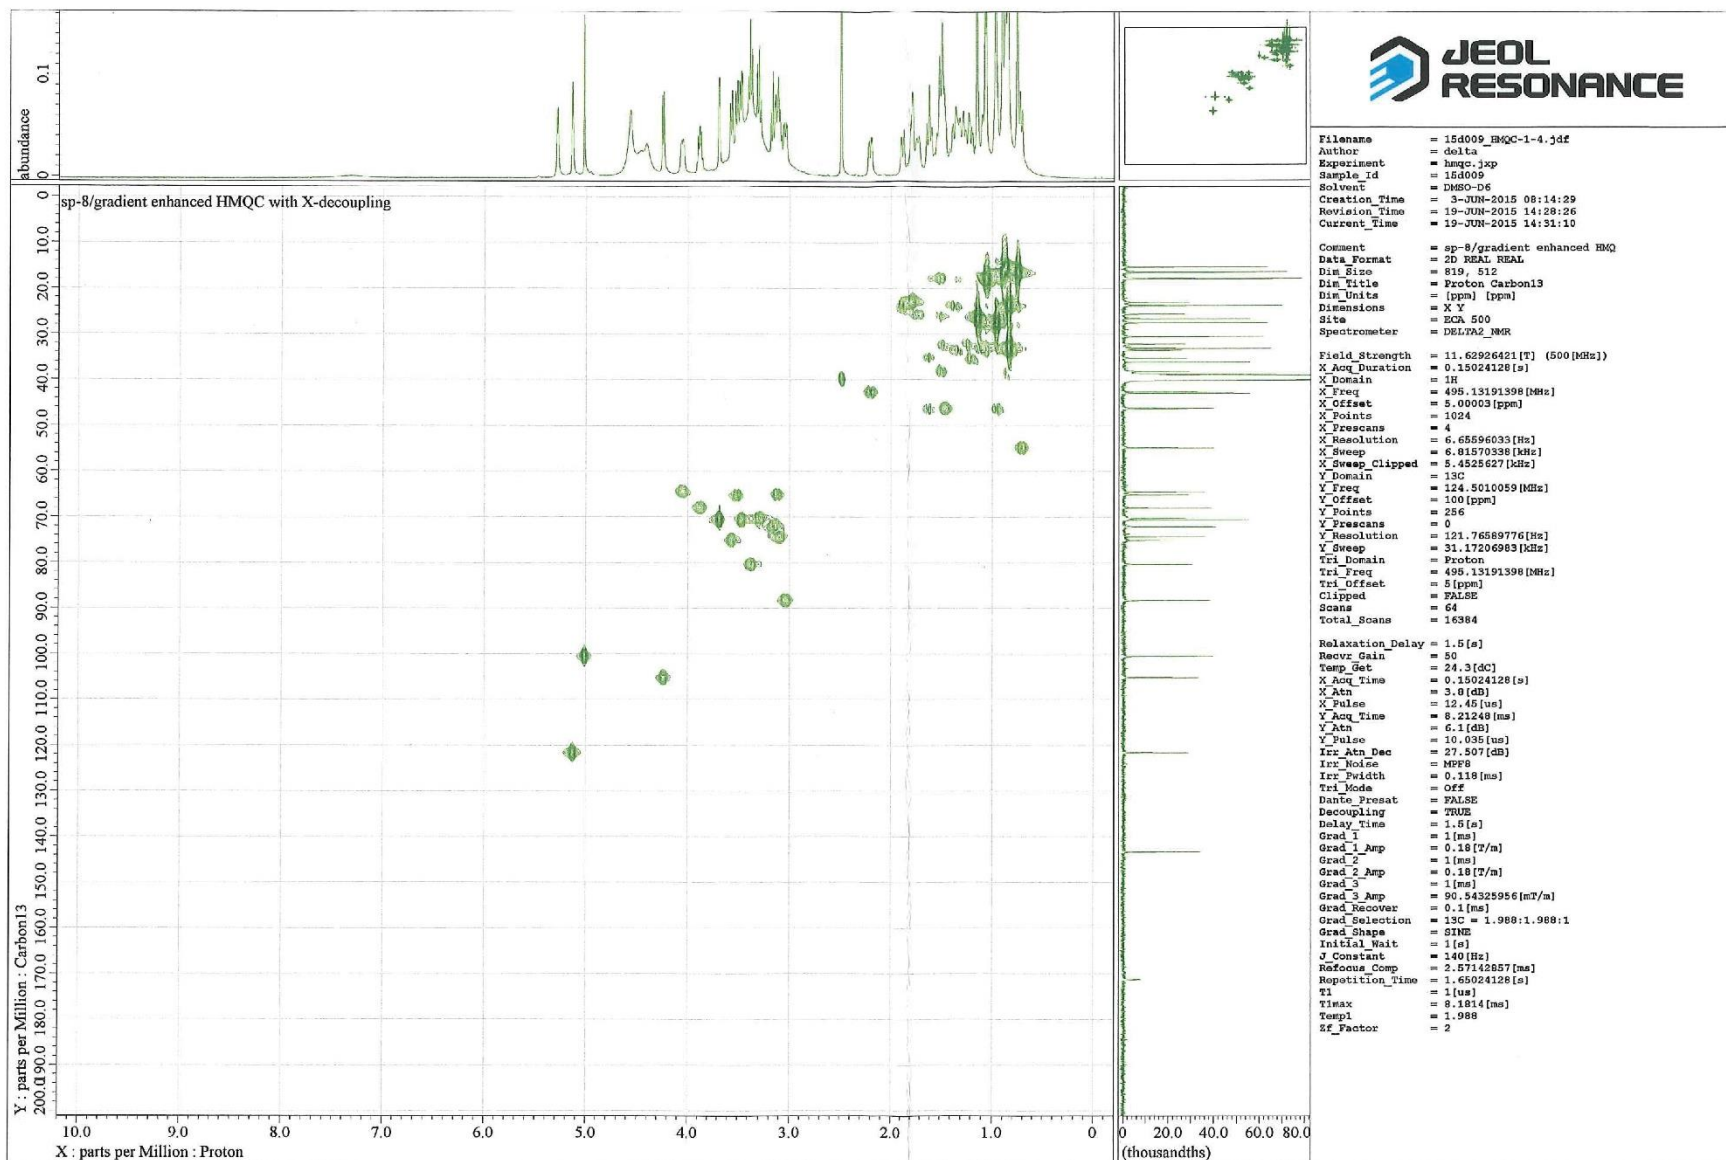



Figure 18. HMBC spectrum of longispinoside A (2) in DMSO-*d*<sub>6</sub>.

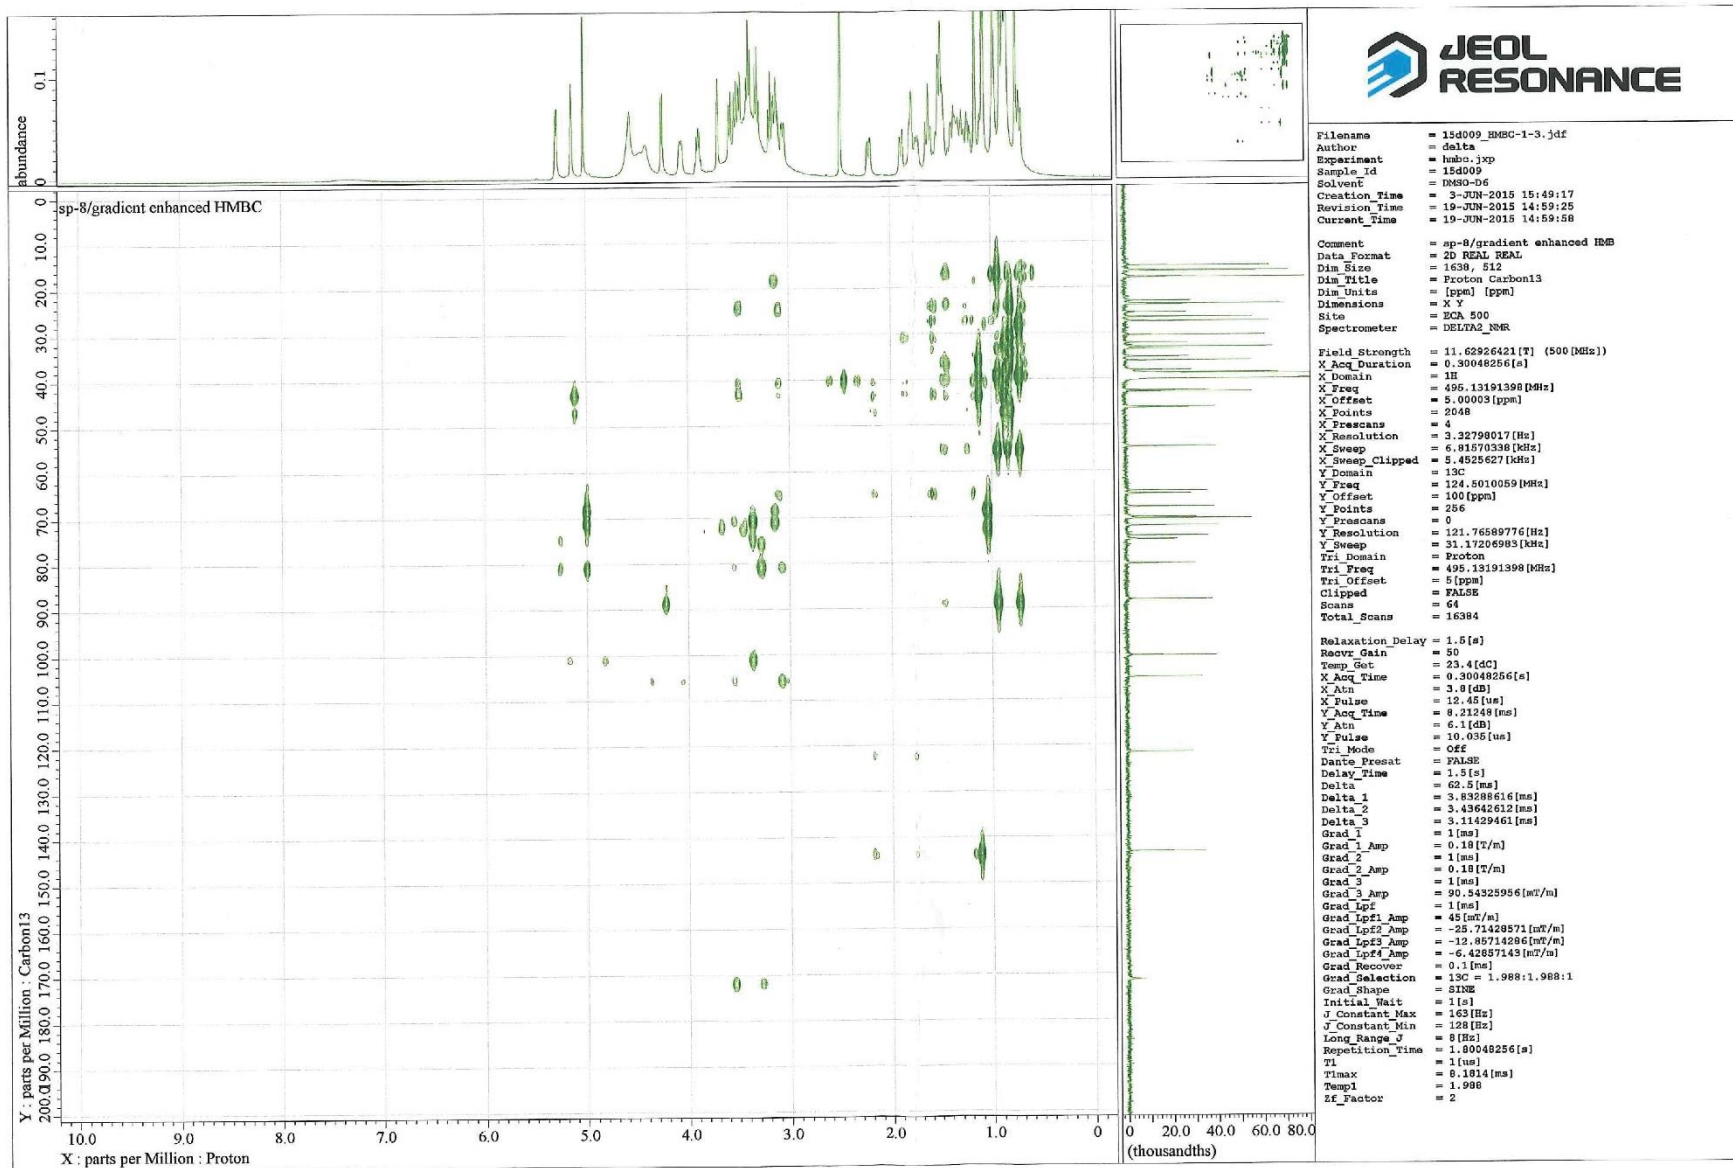

Figure 19. HSQC-TOCSY spectrum of longispinoside A (2) in DMSO-*d*<sub>6</sub>.

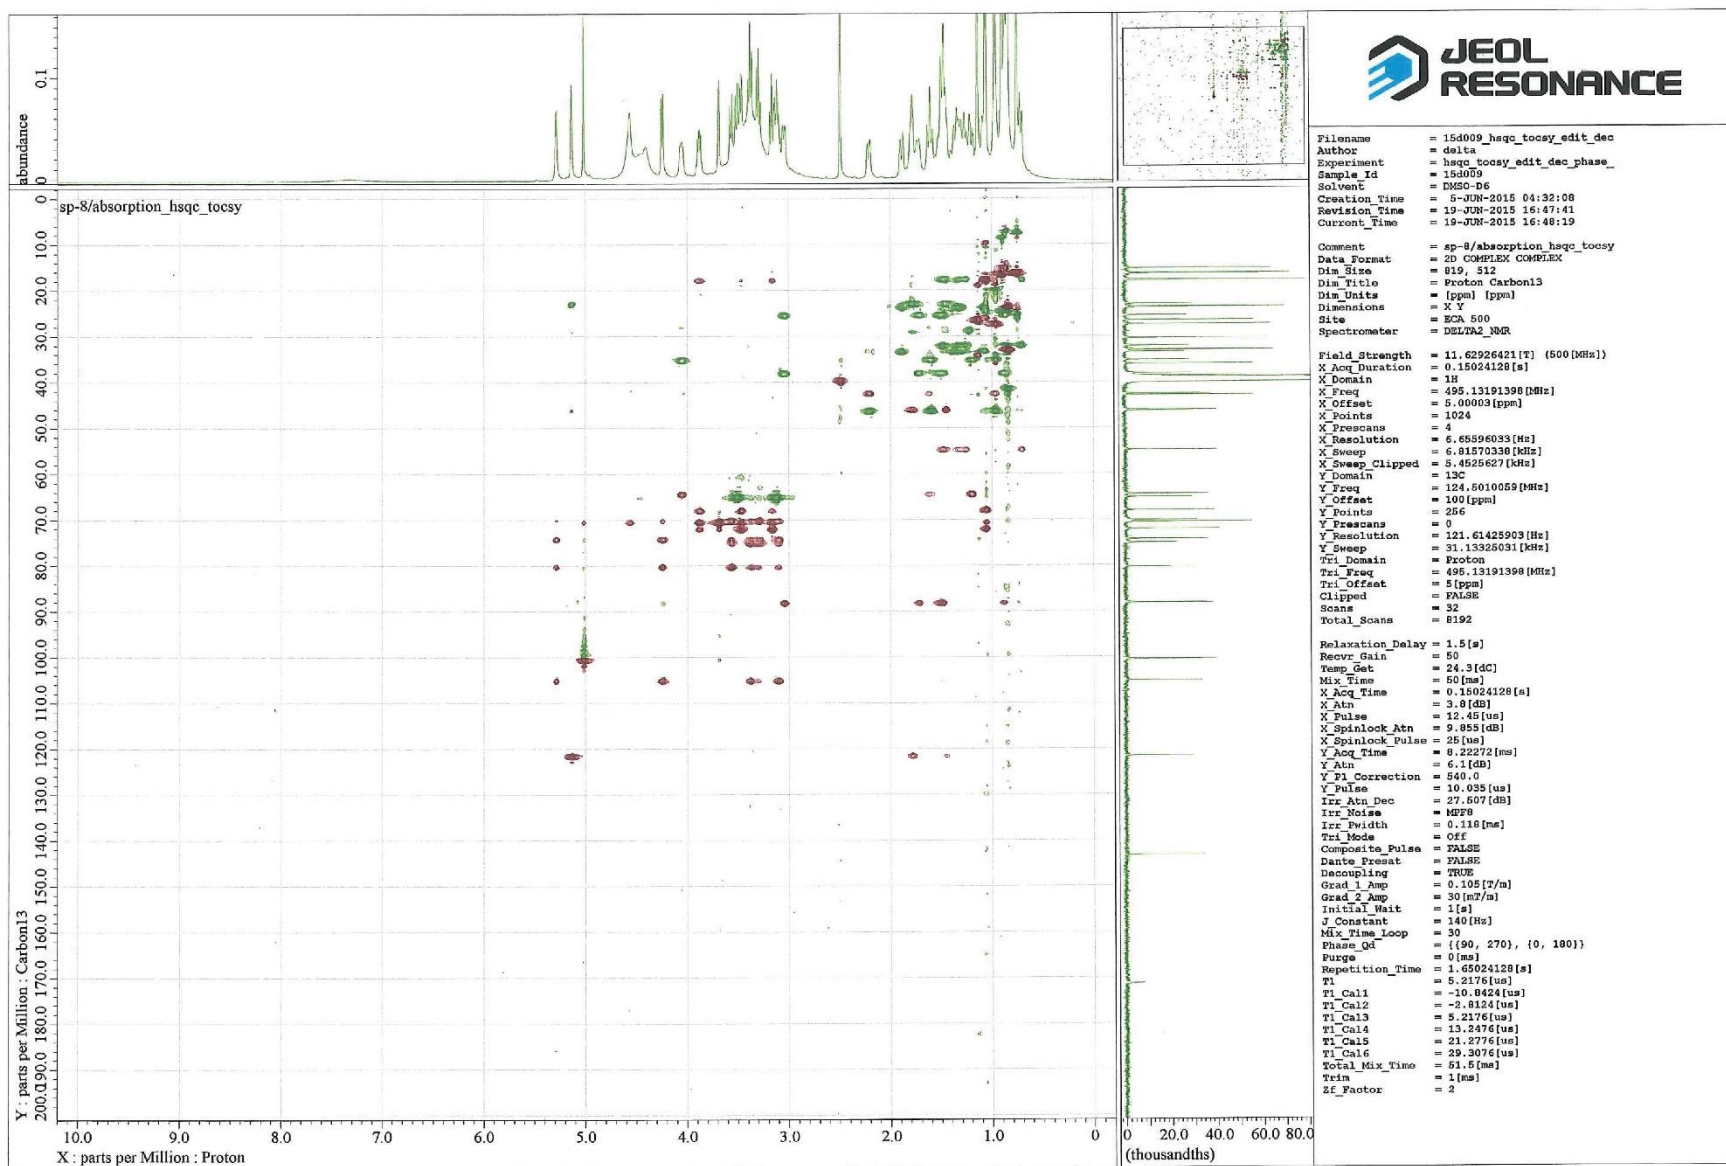

Figure 20. pfg-TOCSY spectrum of longispinoside A (2) in DMSO-*d*<sub>6</sub>.

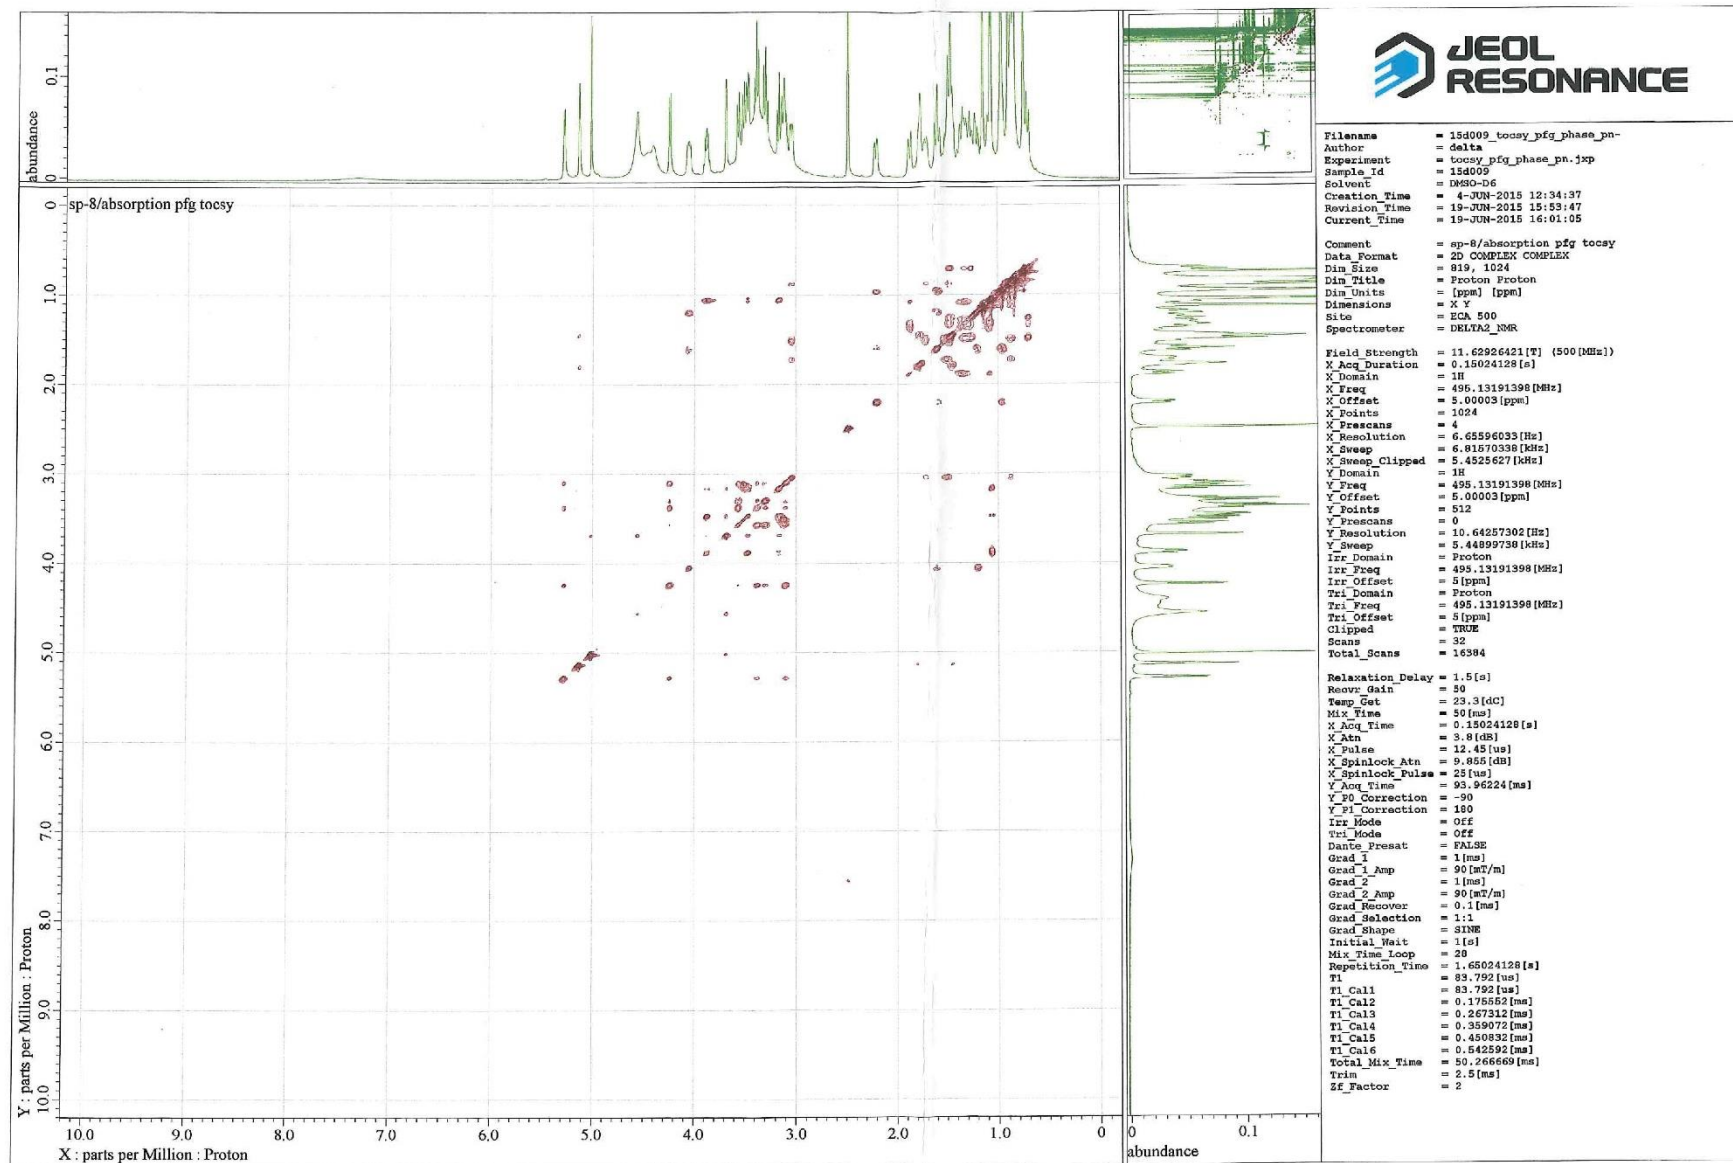

Figure 21. NOESY spectrum of longispinoside A (2) in DMSO-*d*<sub>6</sub>.

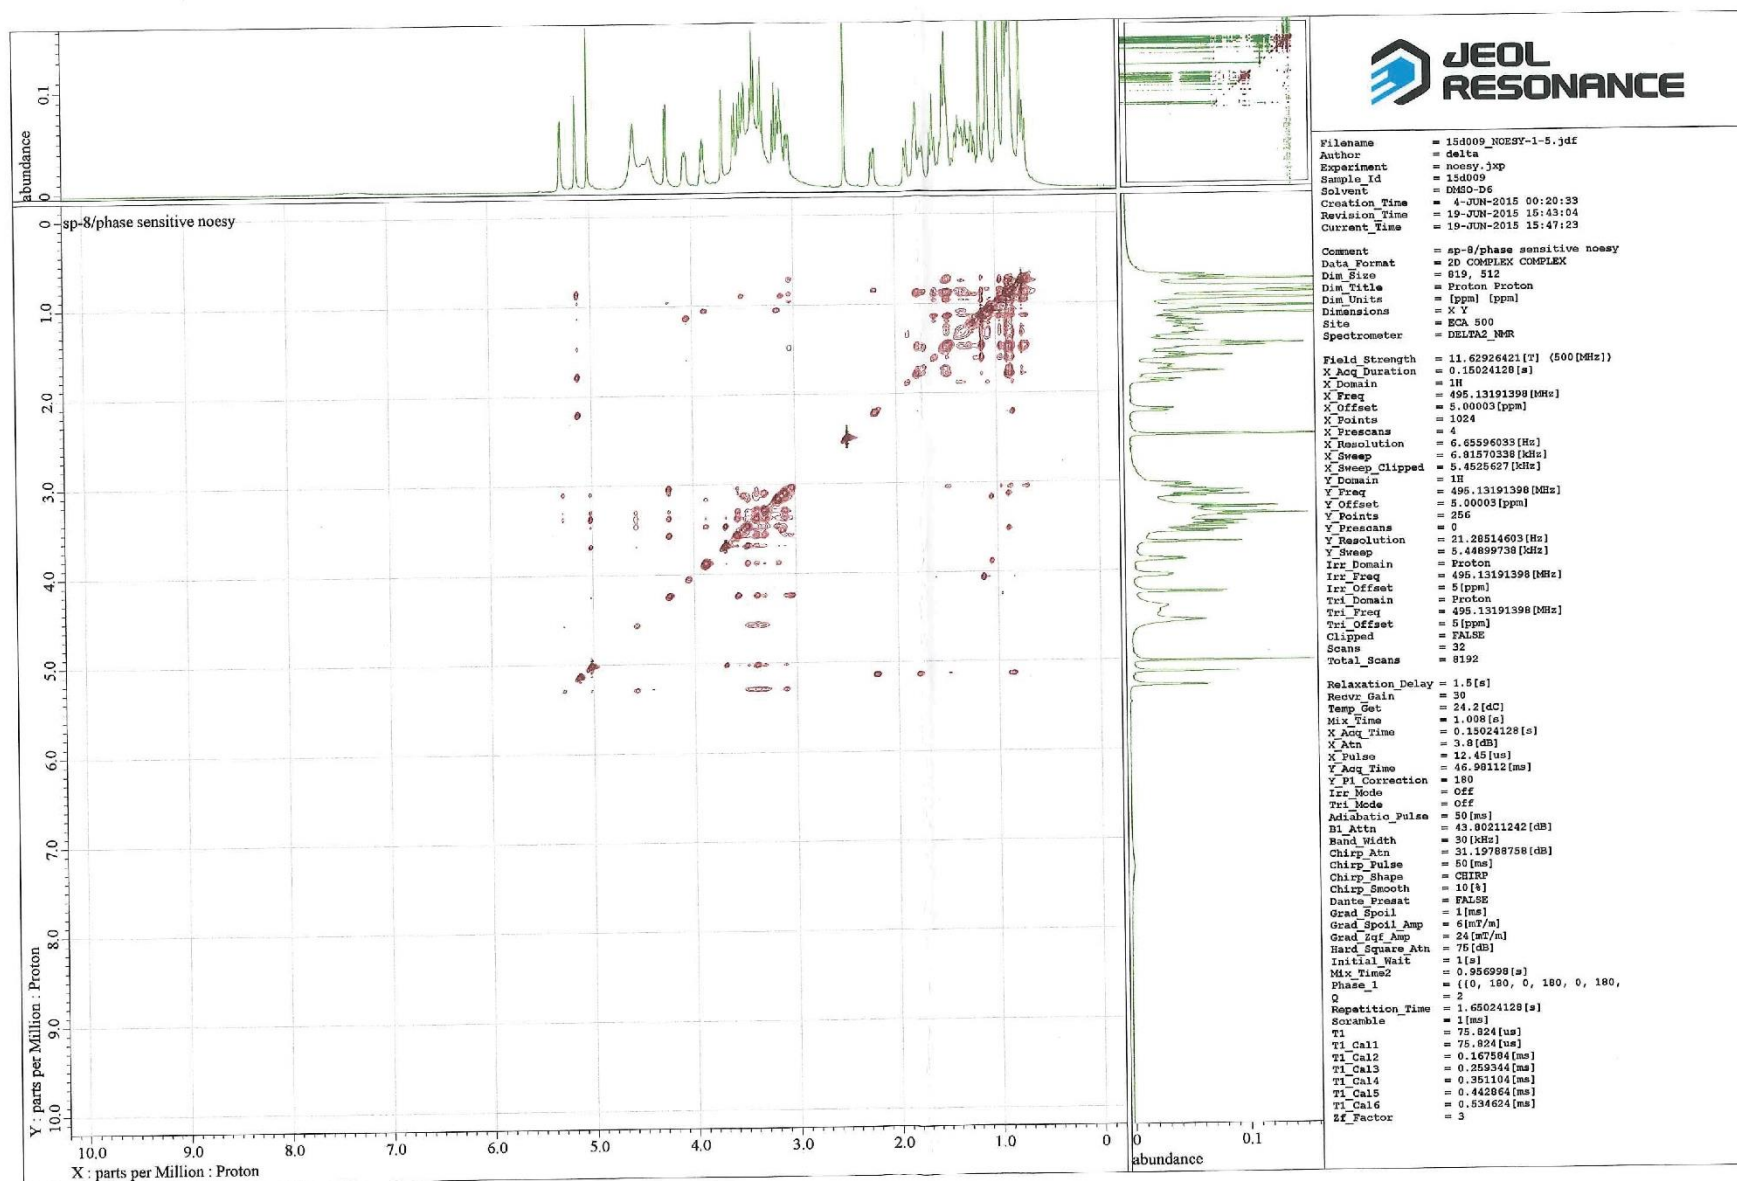

Figure 22. <sup>1</sup>H NMR spectrum (500 MHz) of longispinoside A methyl ester (3) in DMSO-d<sub>6</sub>.

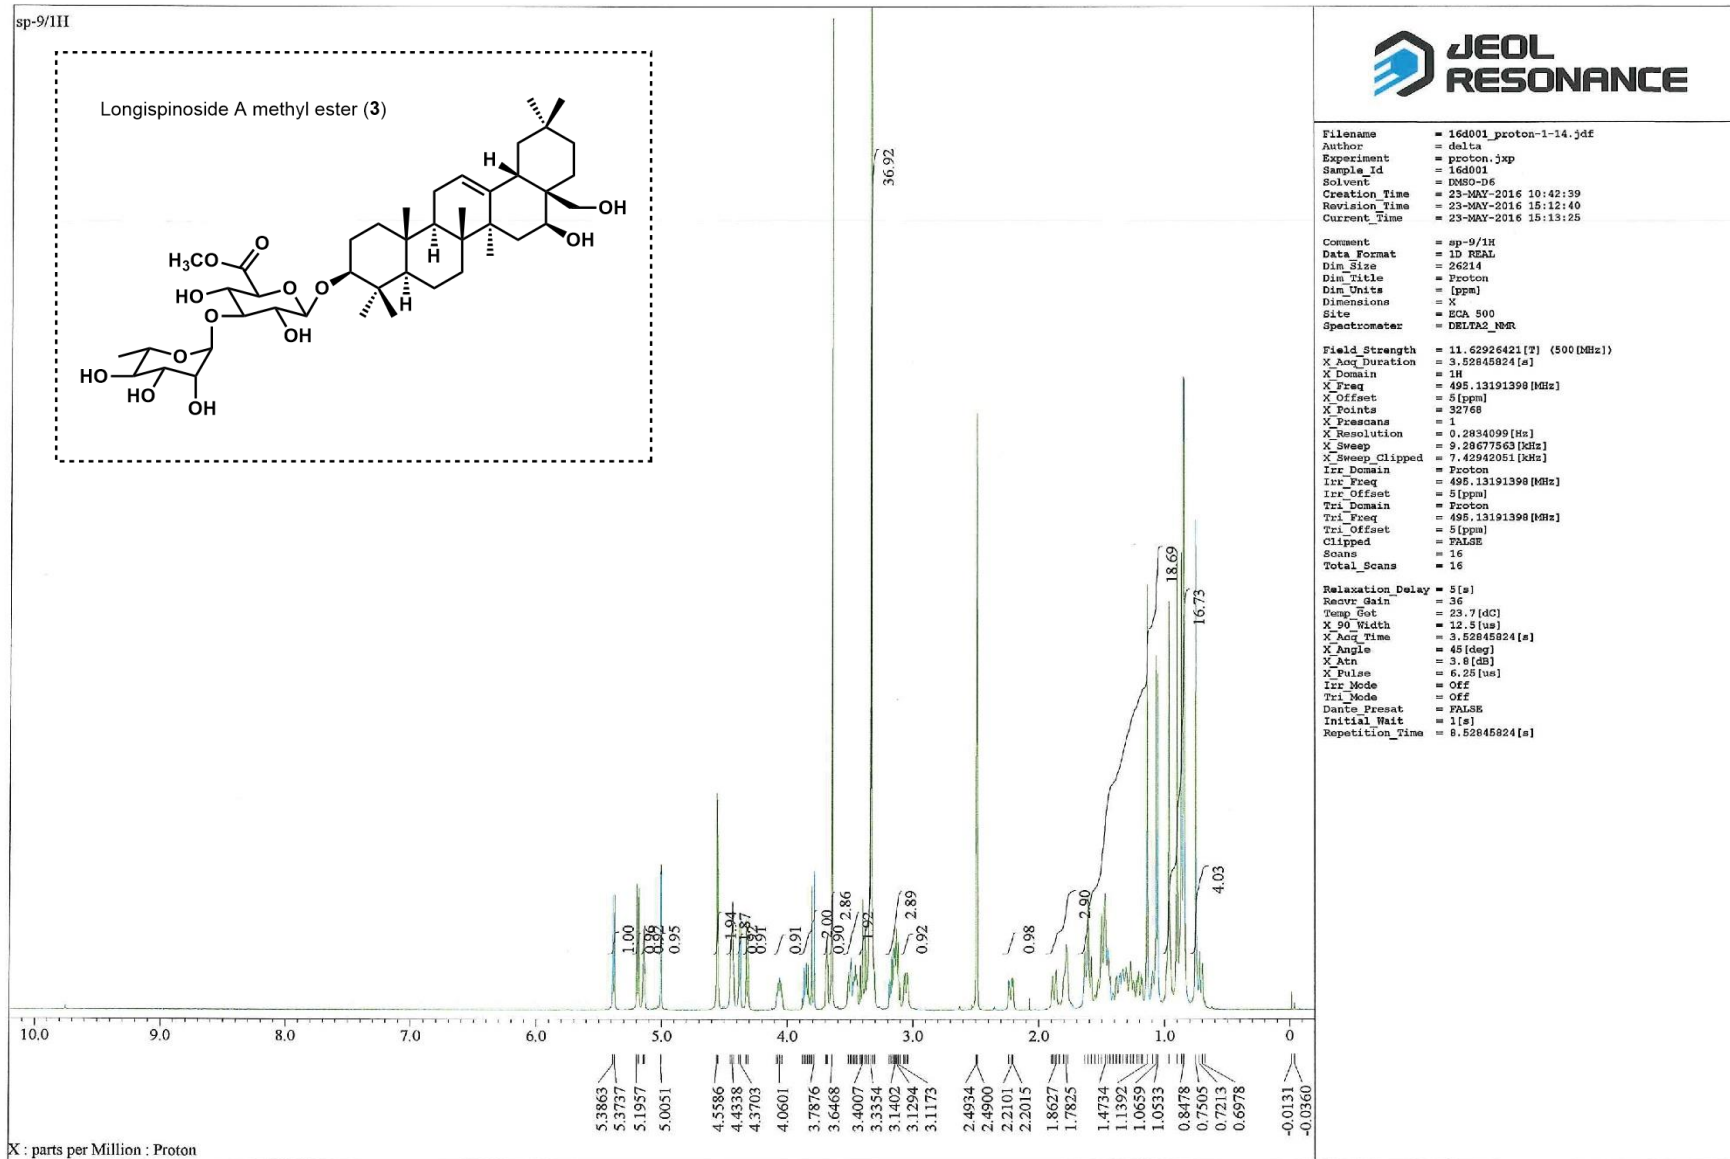

**Figure 23.**  $^{13}\text{C}$  NMR spectrum (125 MHz) of longispinoside A methyl ester (**3**) in  $\text{DMSO-}d_6$ .

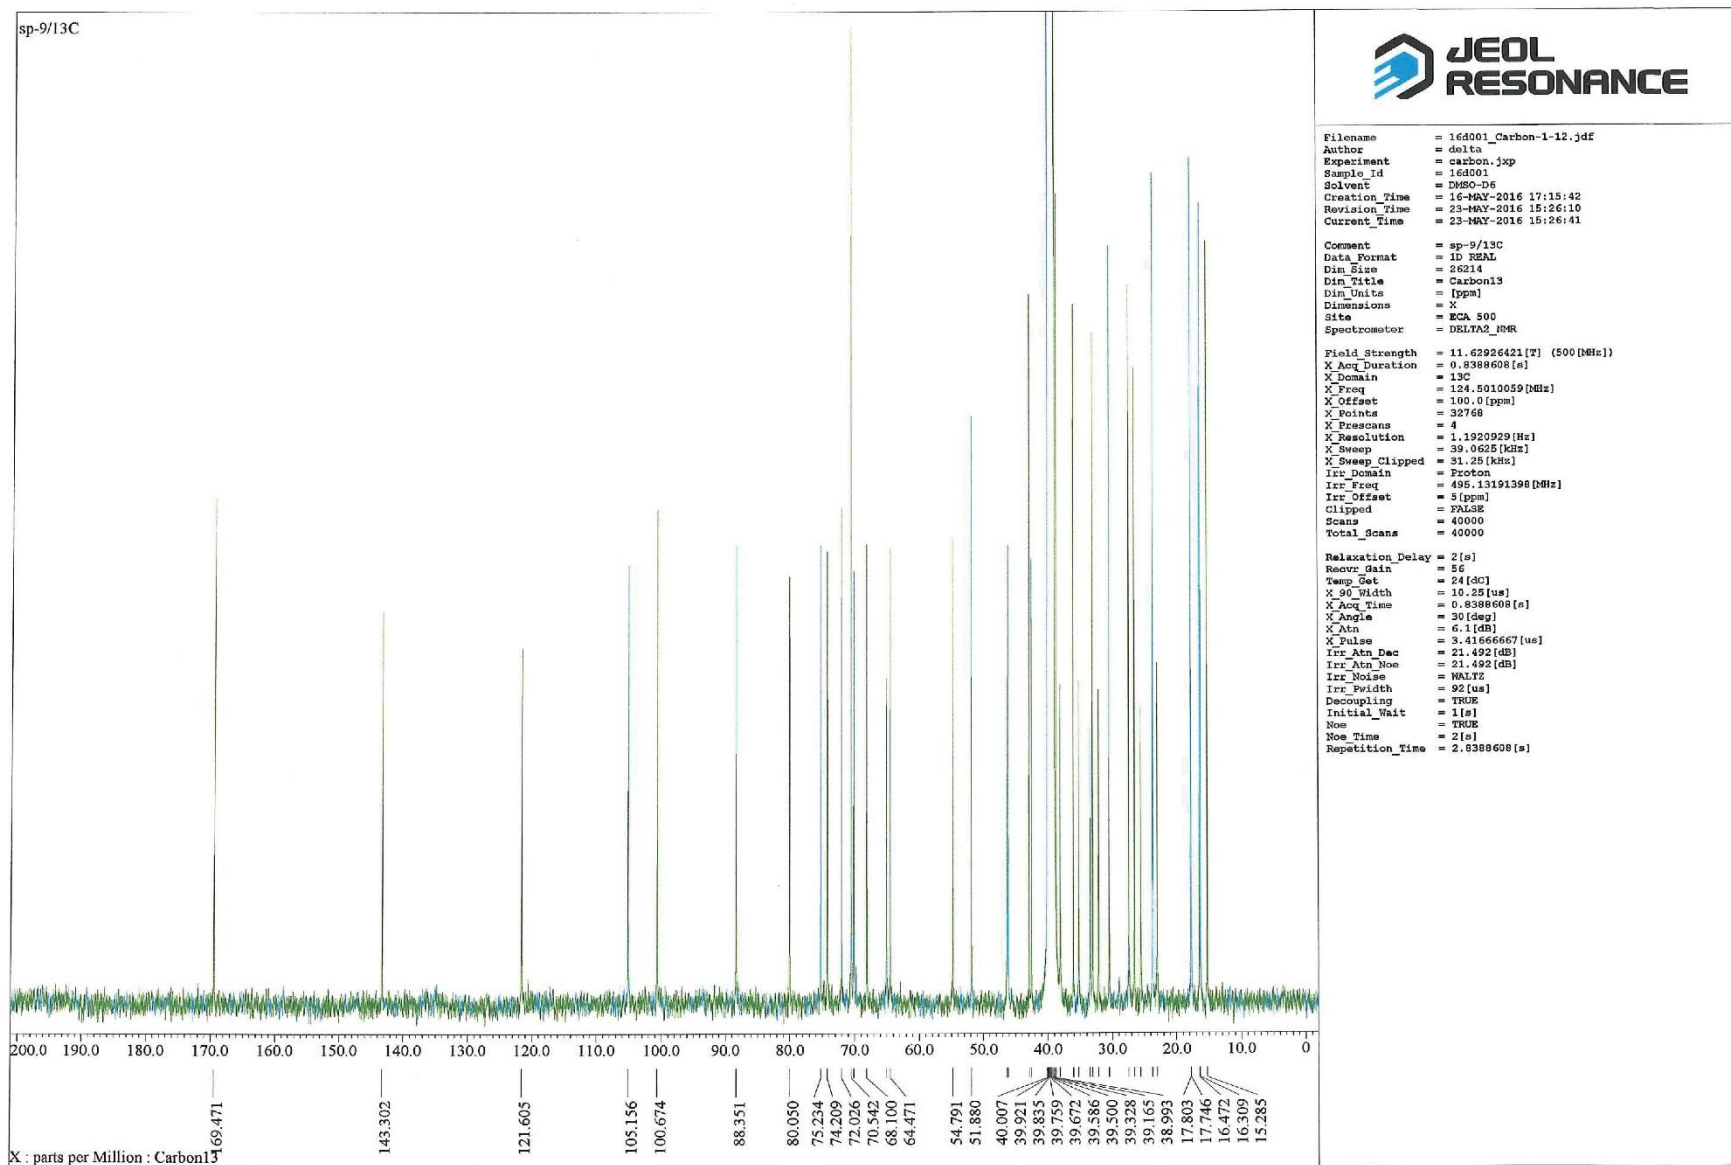

Figure 24. DEPT 90 and 135 pulse NMR spectra of longispinoside A methyl ester (3) in DMSO-*d*<sub>6</sub>.

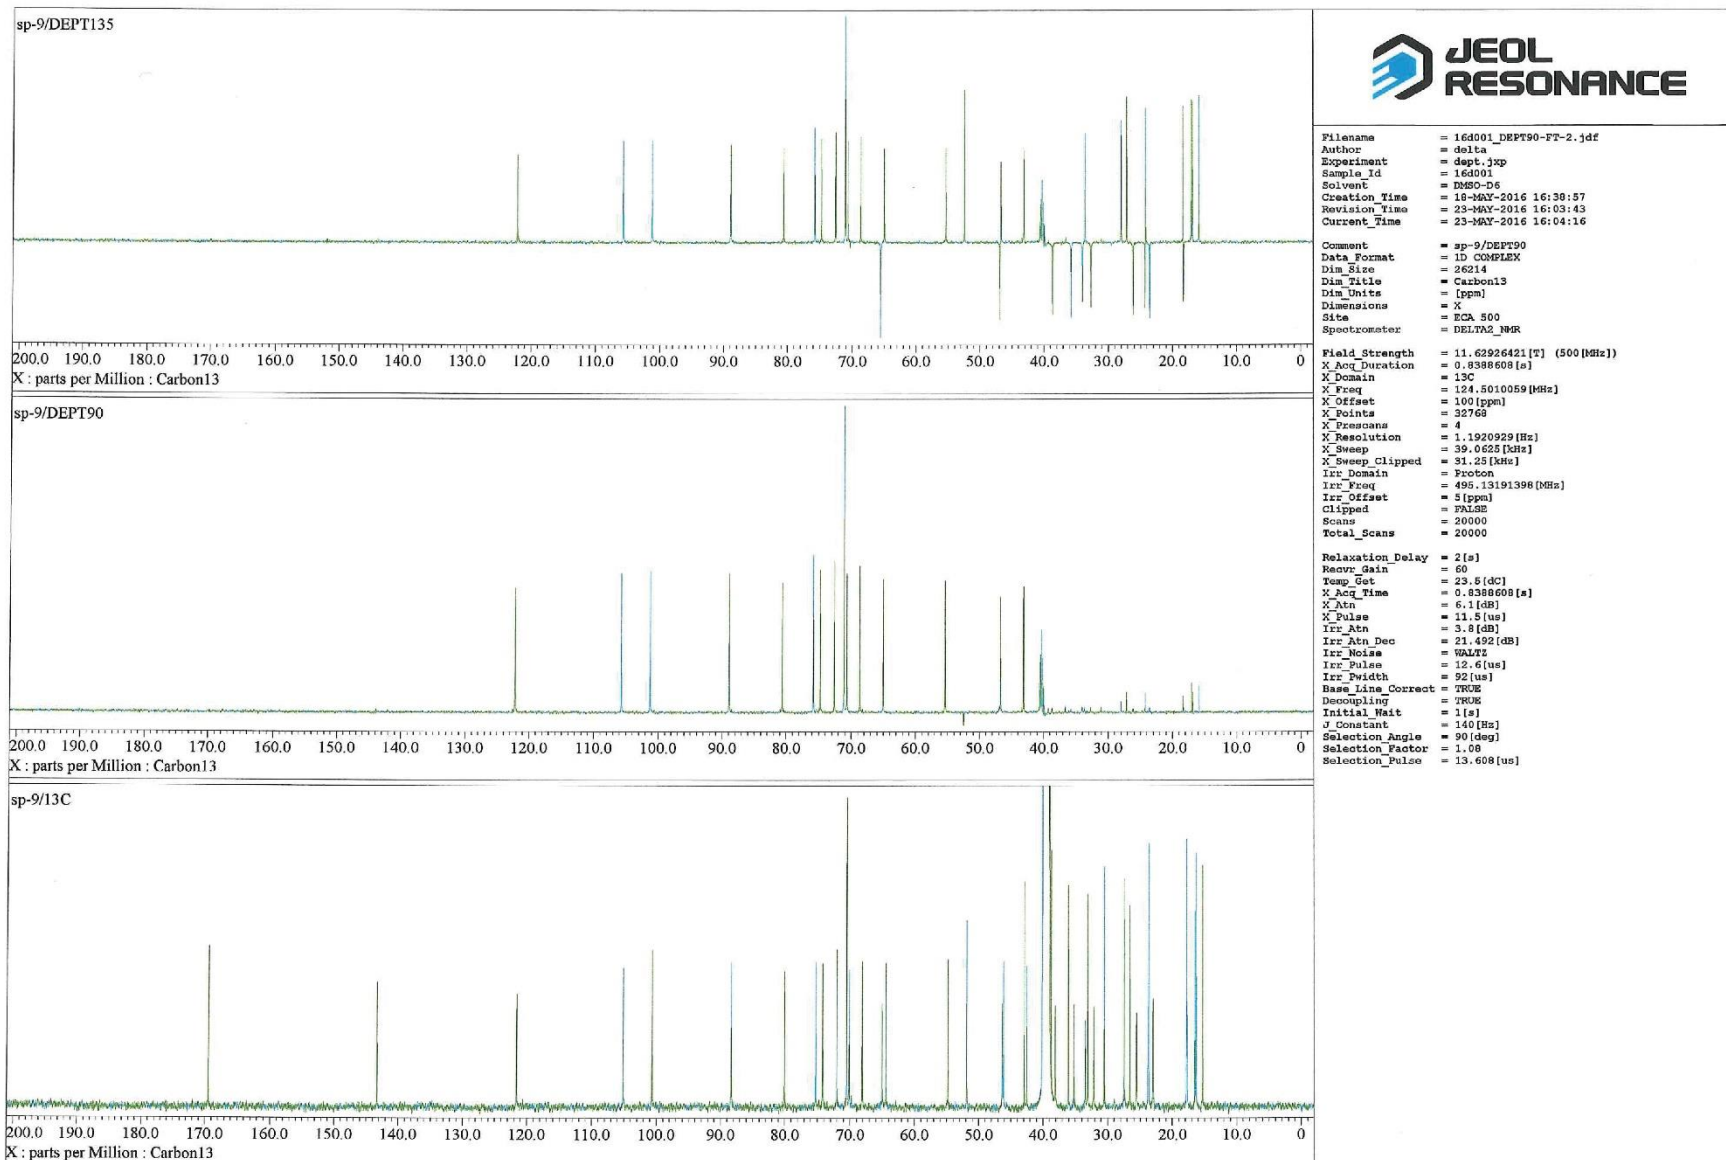

Figure 25. DQF-COSY spectrum of longispinoside A methyl ester (3) in DMSO-*d*<sub>6</sub>.

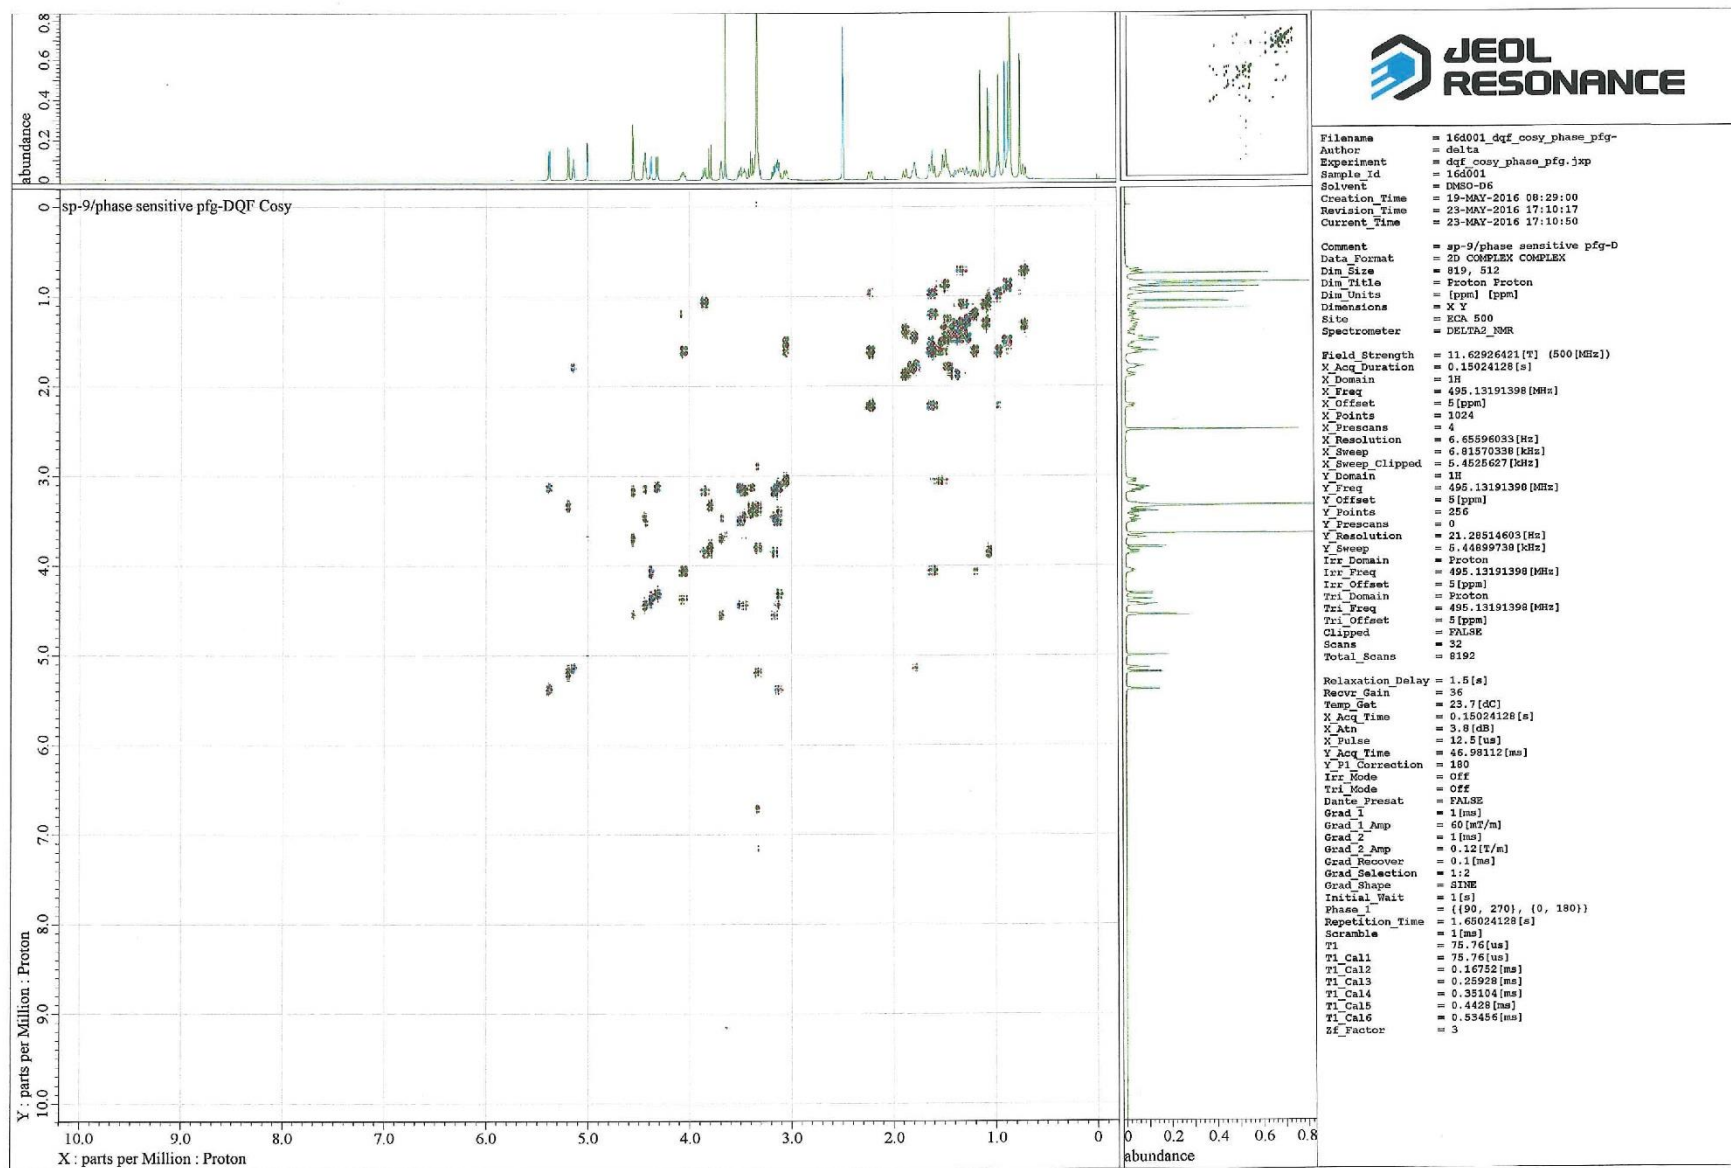



Figure 26. HMQC spectrum of longispinoside A methyl ester (3) in DMSO-*d*<sub>6</sub>.

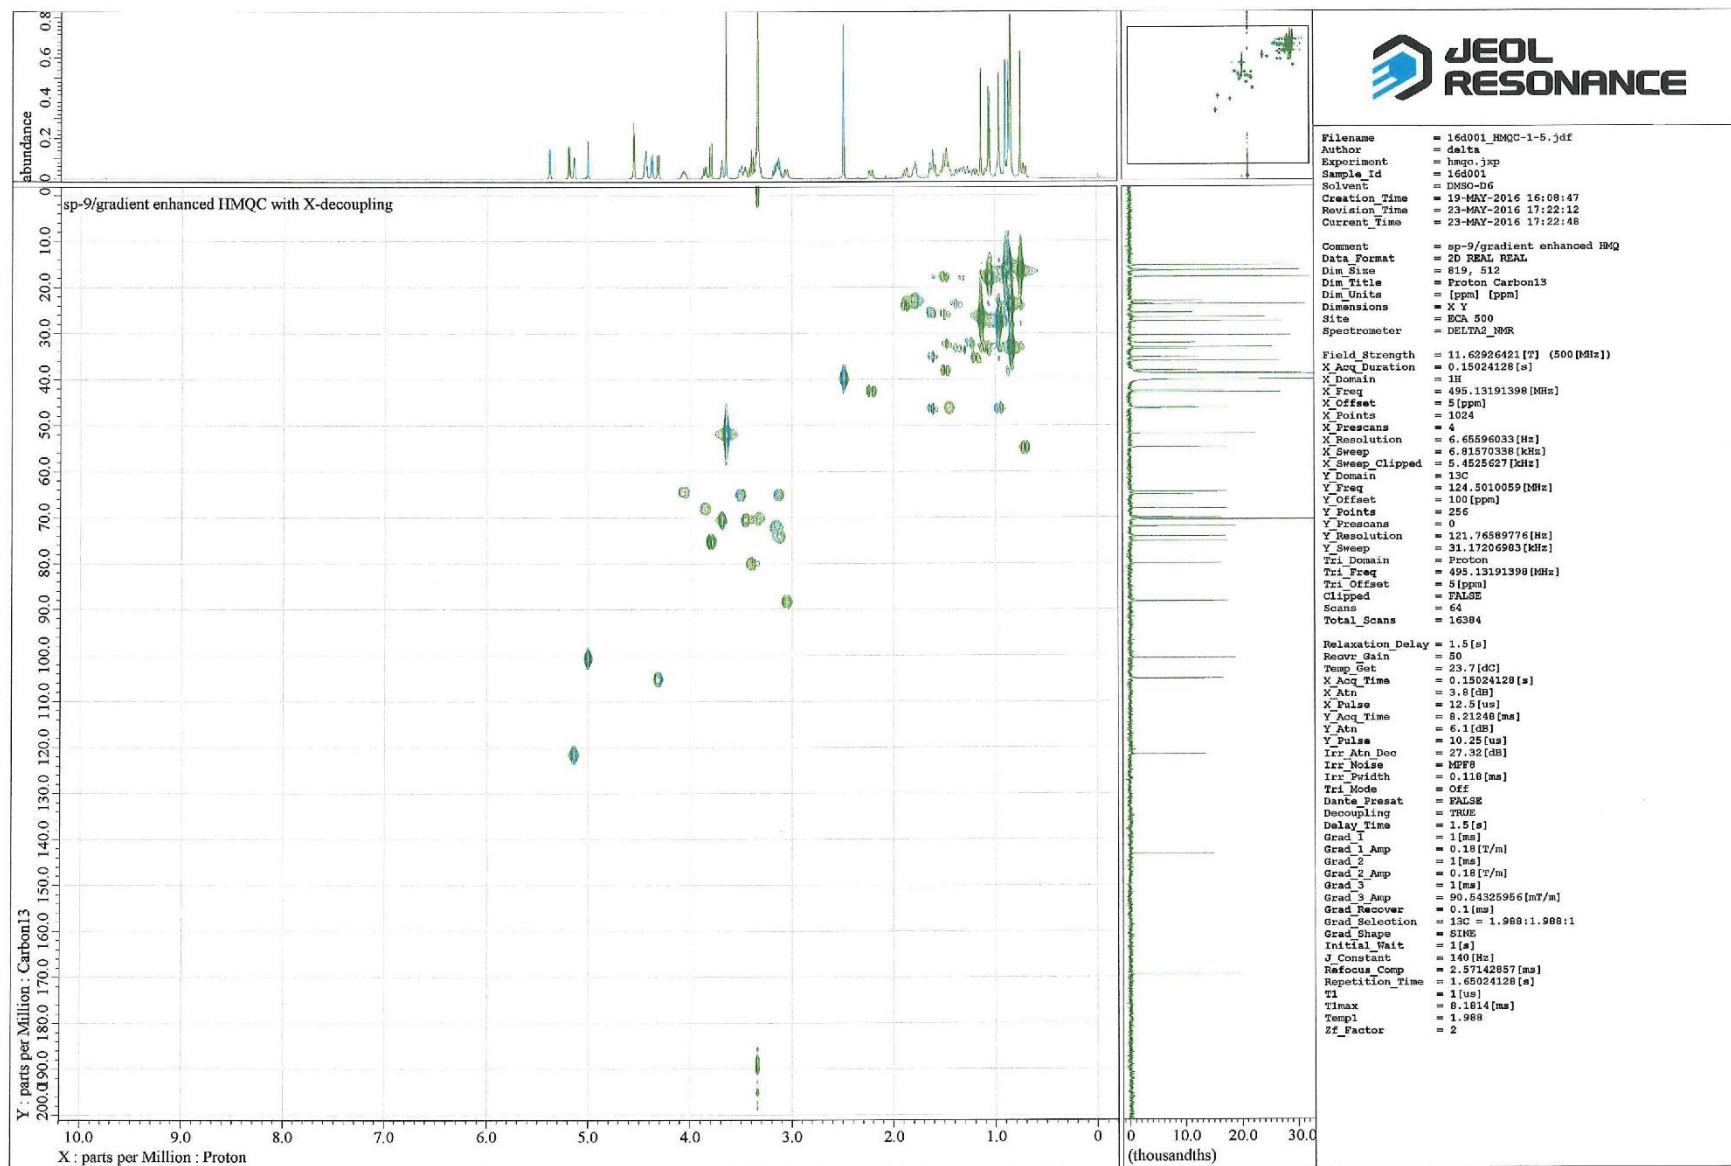

Figure 27. HMBC spectrum of longispinoside A methyl ester (3) in DMSO-*d*<sub>6</sub>.

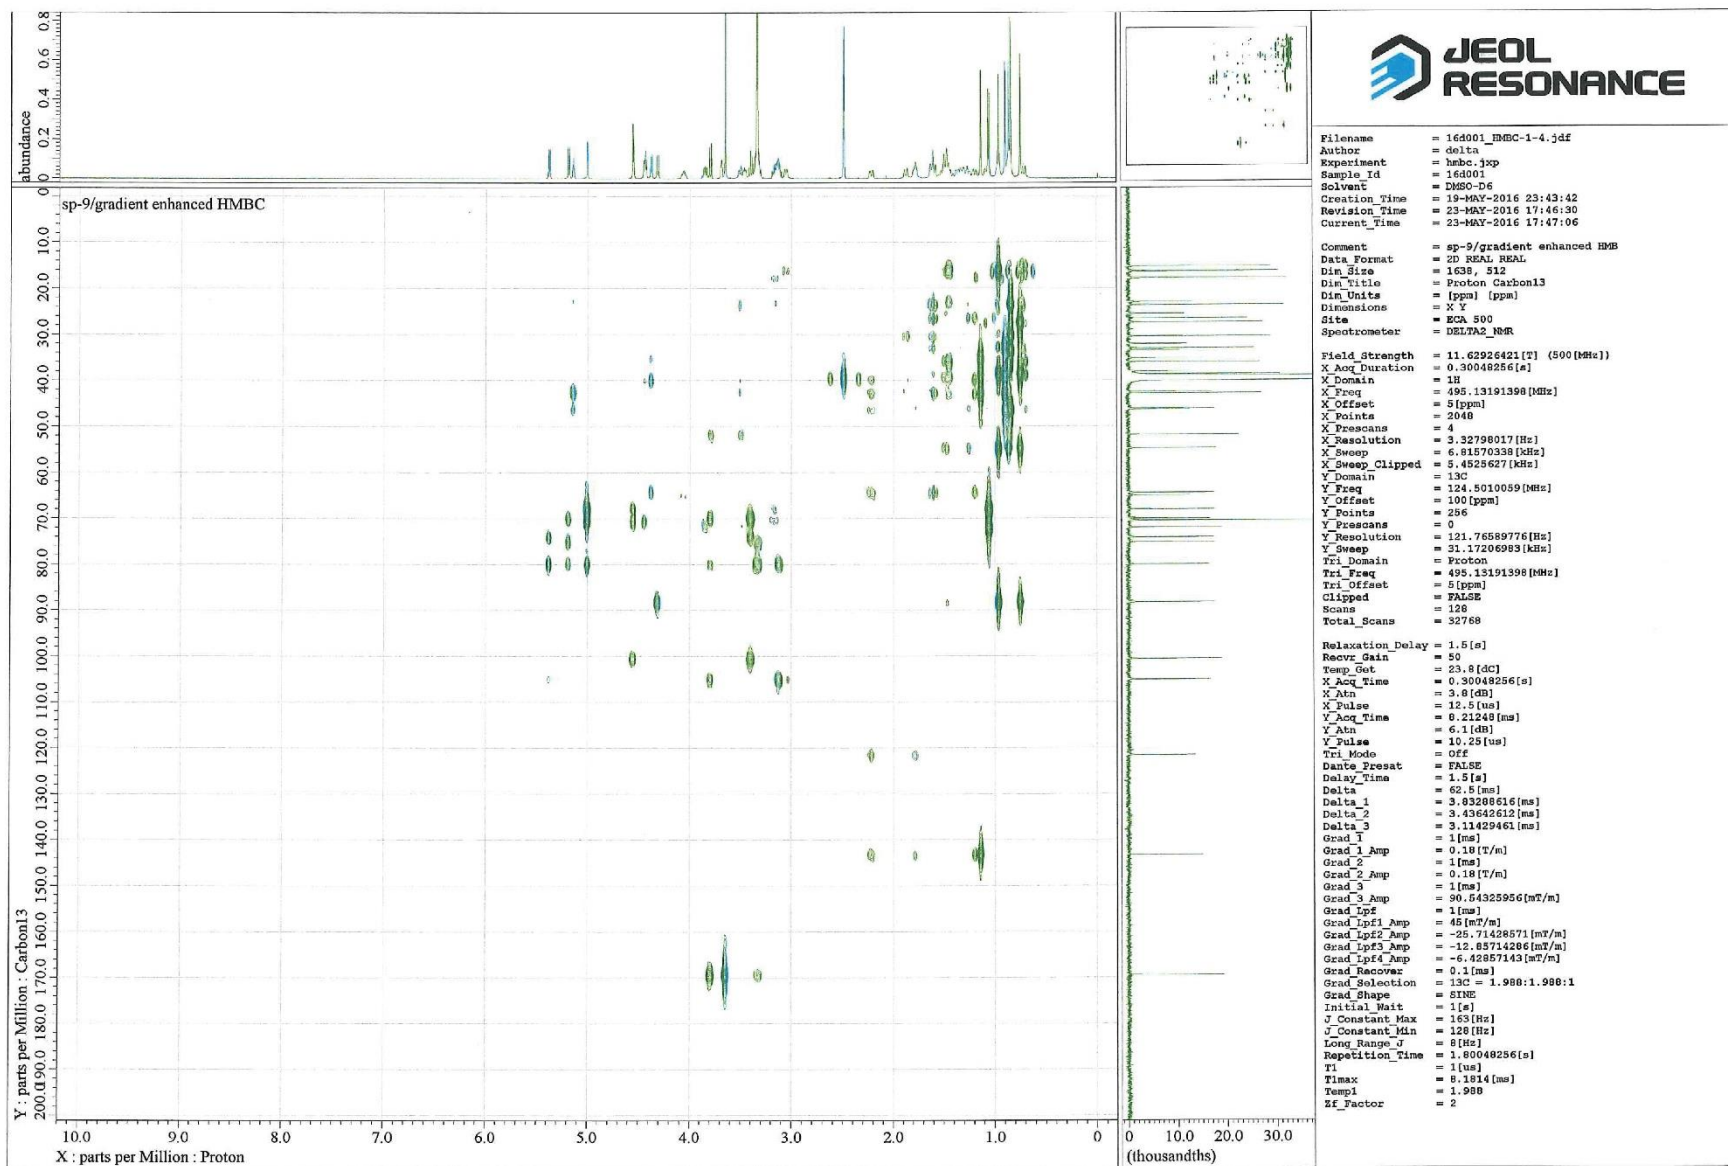

Figure 28. HSQC-TOCSY spectrum of longispinoside A methyl ester (3) in DMSO-*d*<sub>6</sub>.

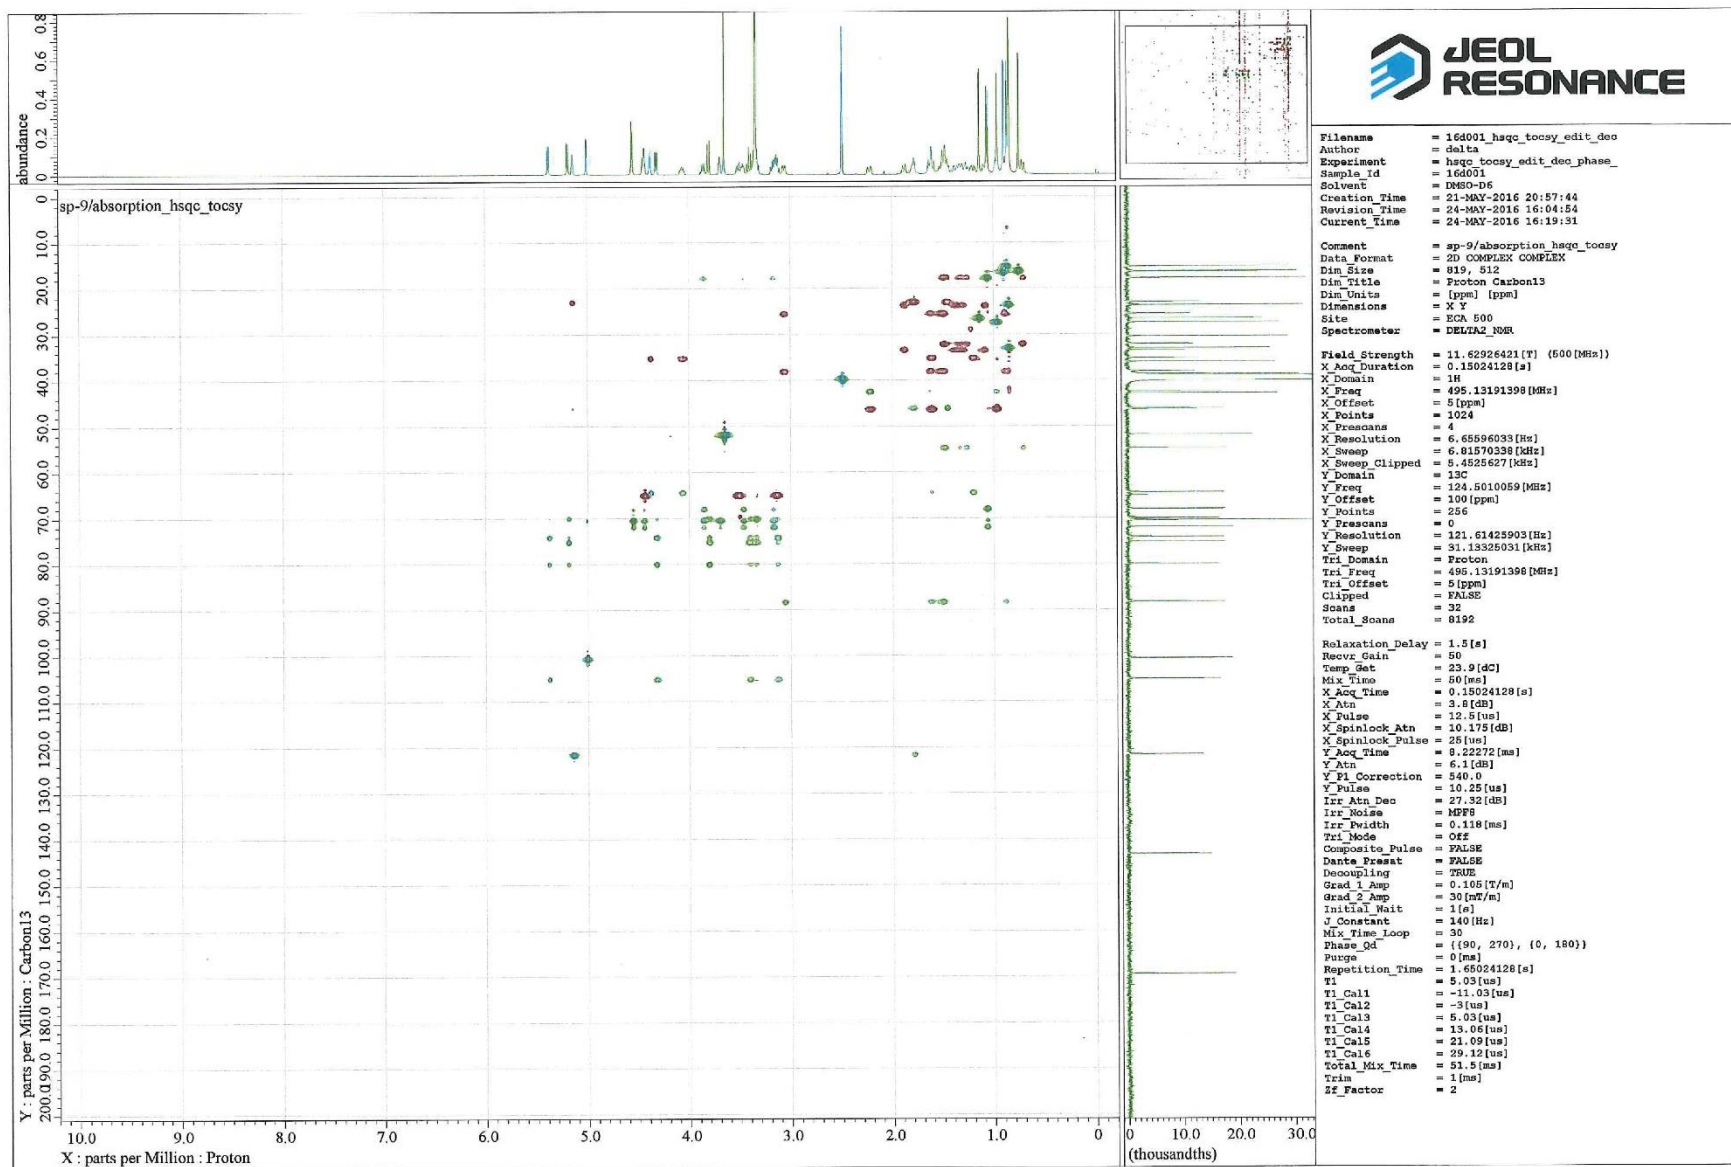

Figure 29. pfg-TOCSY spectrum of longispinoside A methyl ester (3) in DMSO-*d*<sub>6</sub>.

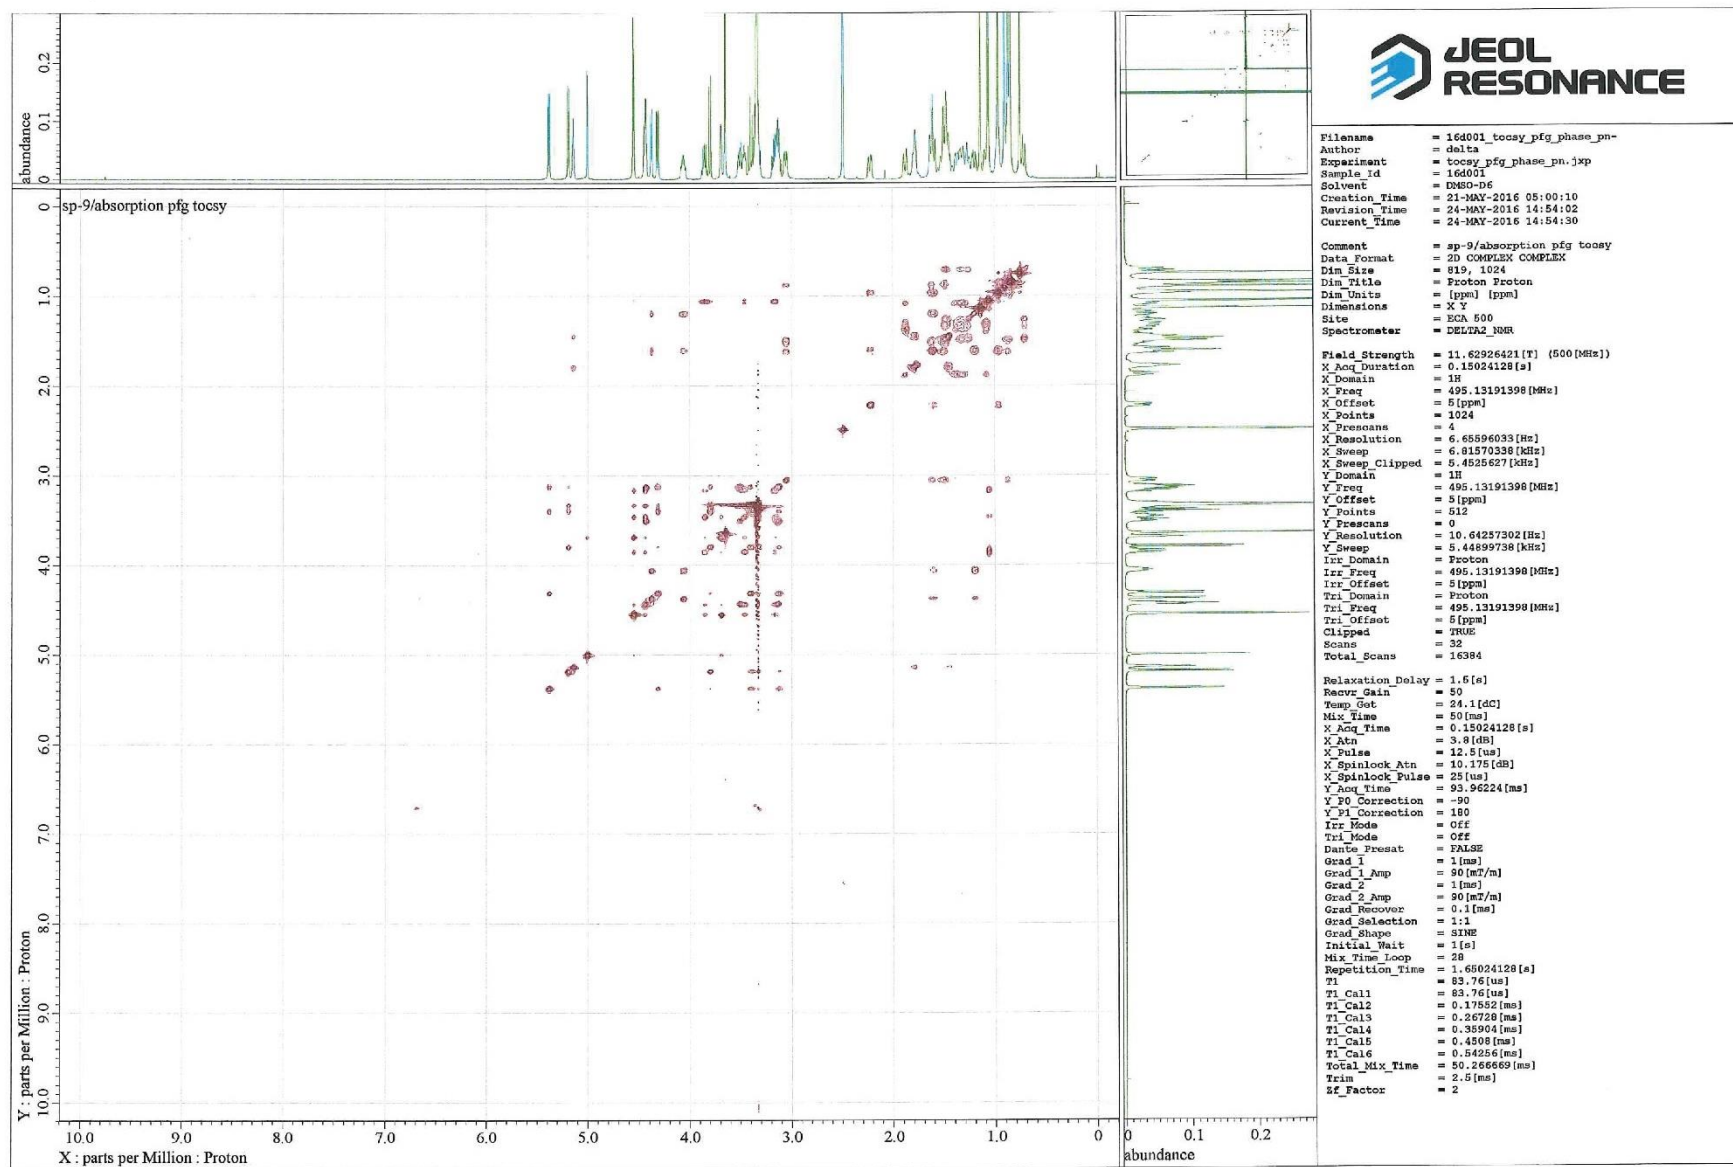

Figure 30. NOESY spectrum of longispinoside A methyl ester (3) in DMSO-*d*<sub>6</sub>.

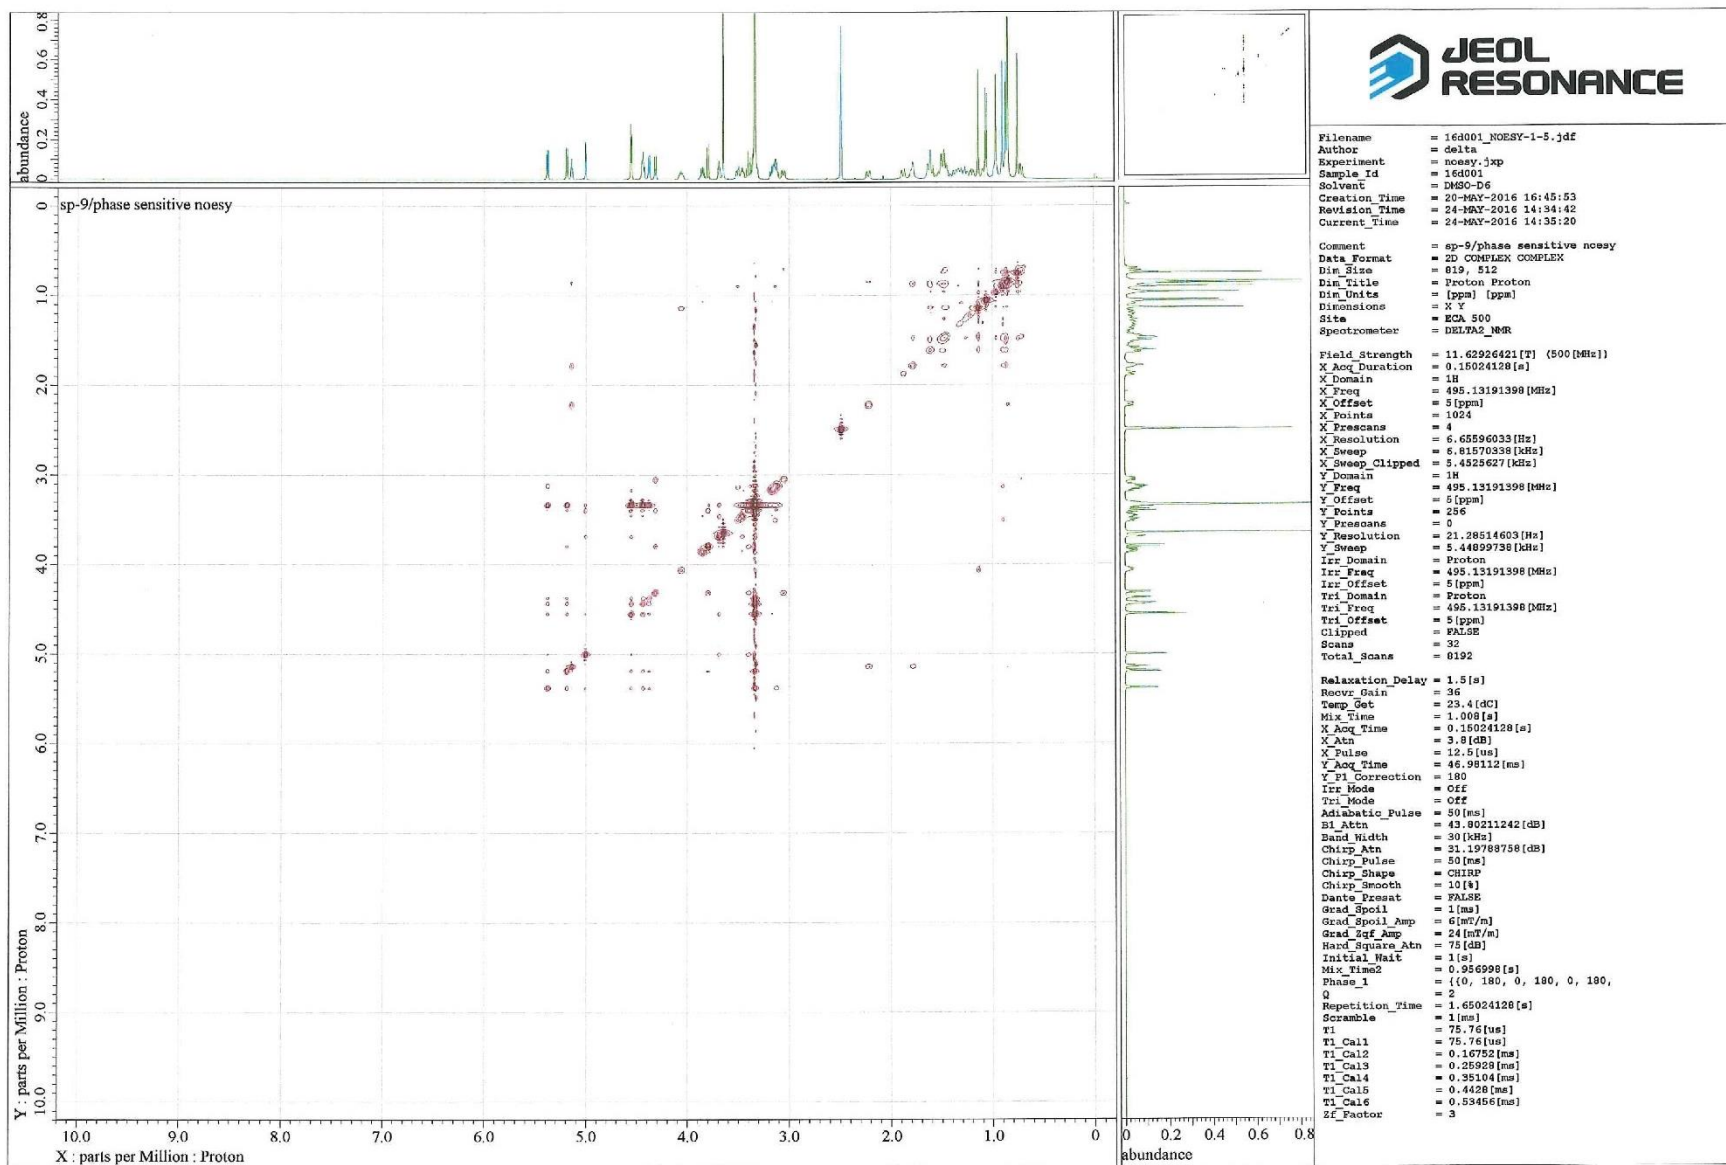

**Figure 31.**  $^1\text{H}$  NMR spectrum (500 MHz) of erythronoside A methyl ester (**4**) in  $\text{DMSO-}d_6$ .

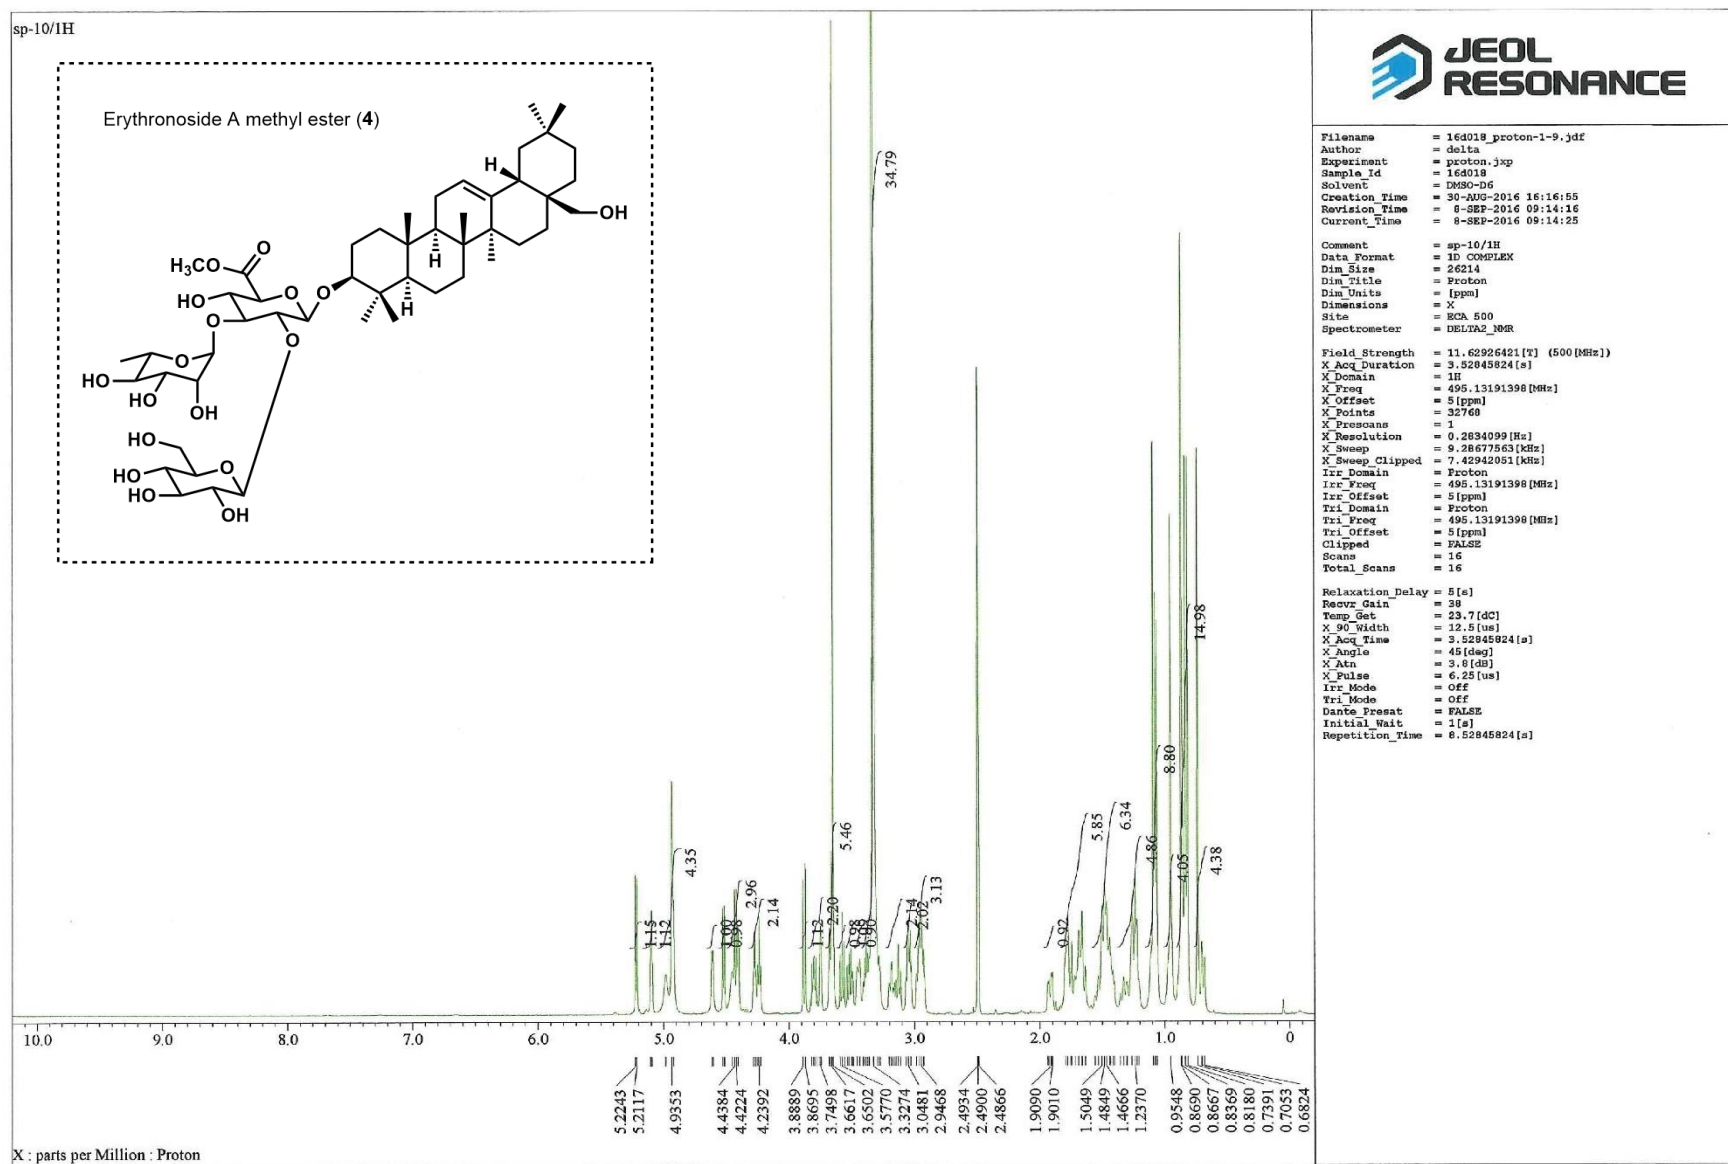

**Figure 32.**  $^{13}\text{C}$  NMR spectrum (125 MHz) of erythronoside A methyl ester (**4**) in  $\text{DMSO-}d_6$ .

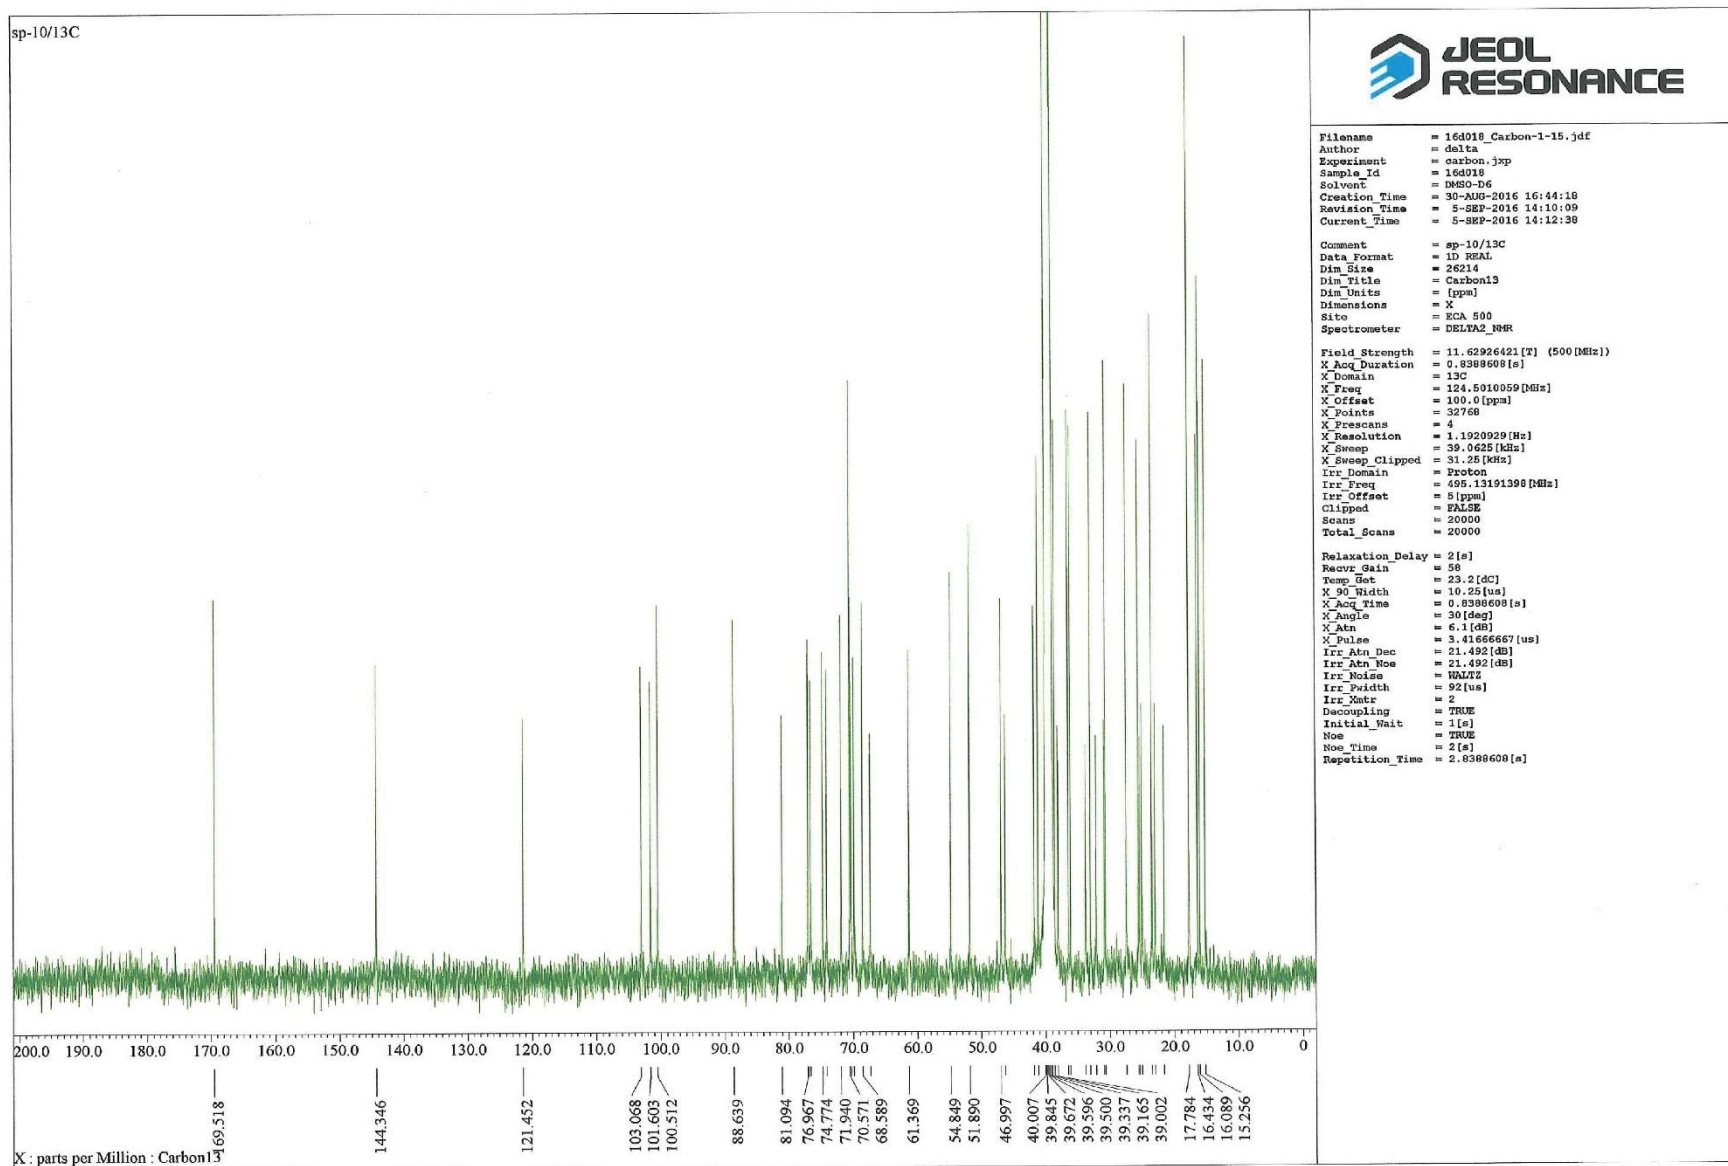

Figure 33. DEPT 90 and 135 pulse NMR spectra of erythronoside A methyl ester (4) in DMSO-*d*<sub>6</sub>.

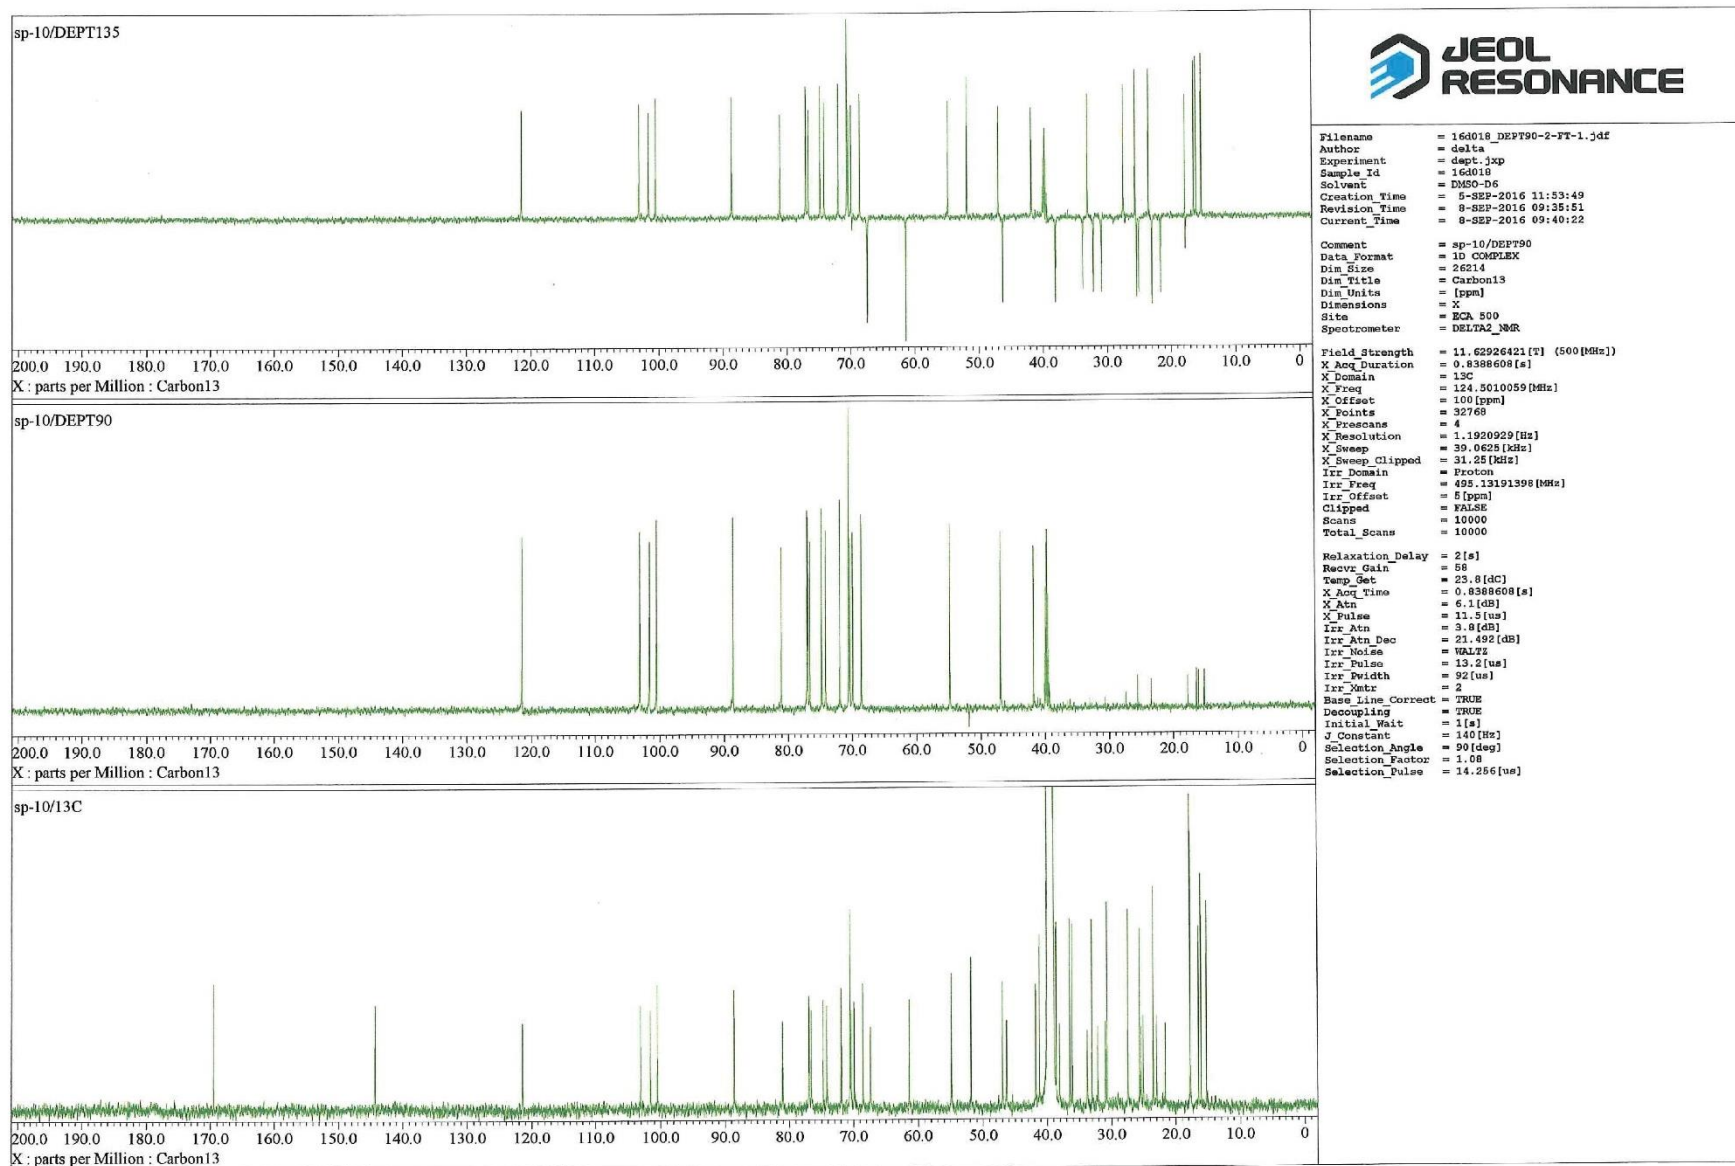



Figure 34. DQF-COSY spectrum of erythronoside A methyl ester (4) in DMSO-*d*<sub>6</sub>.

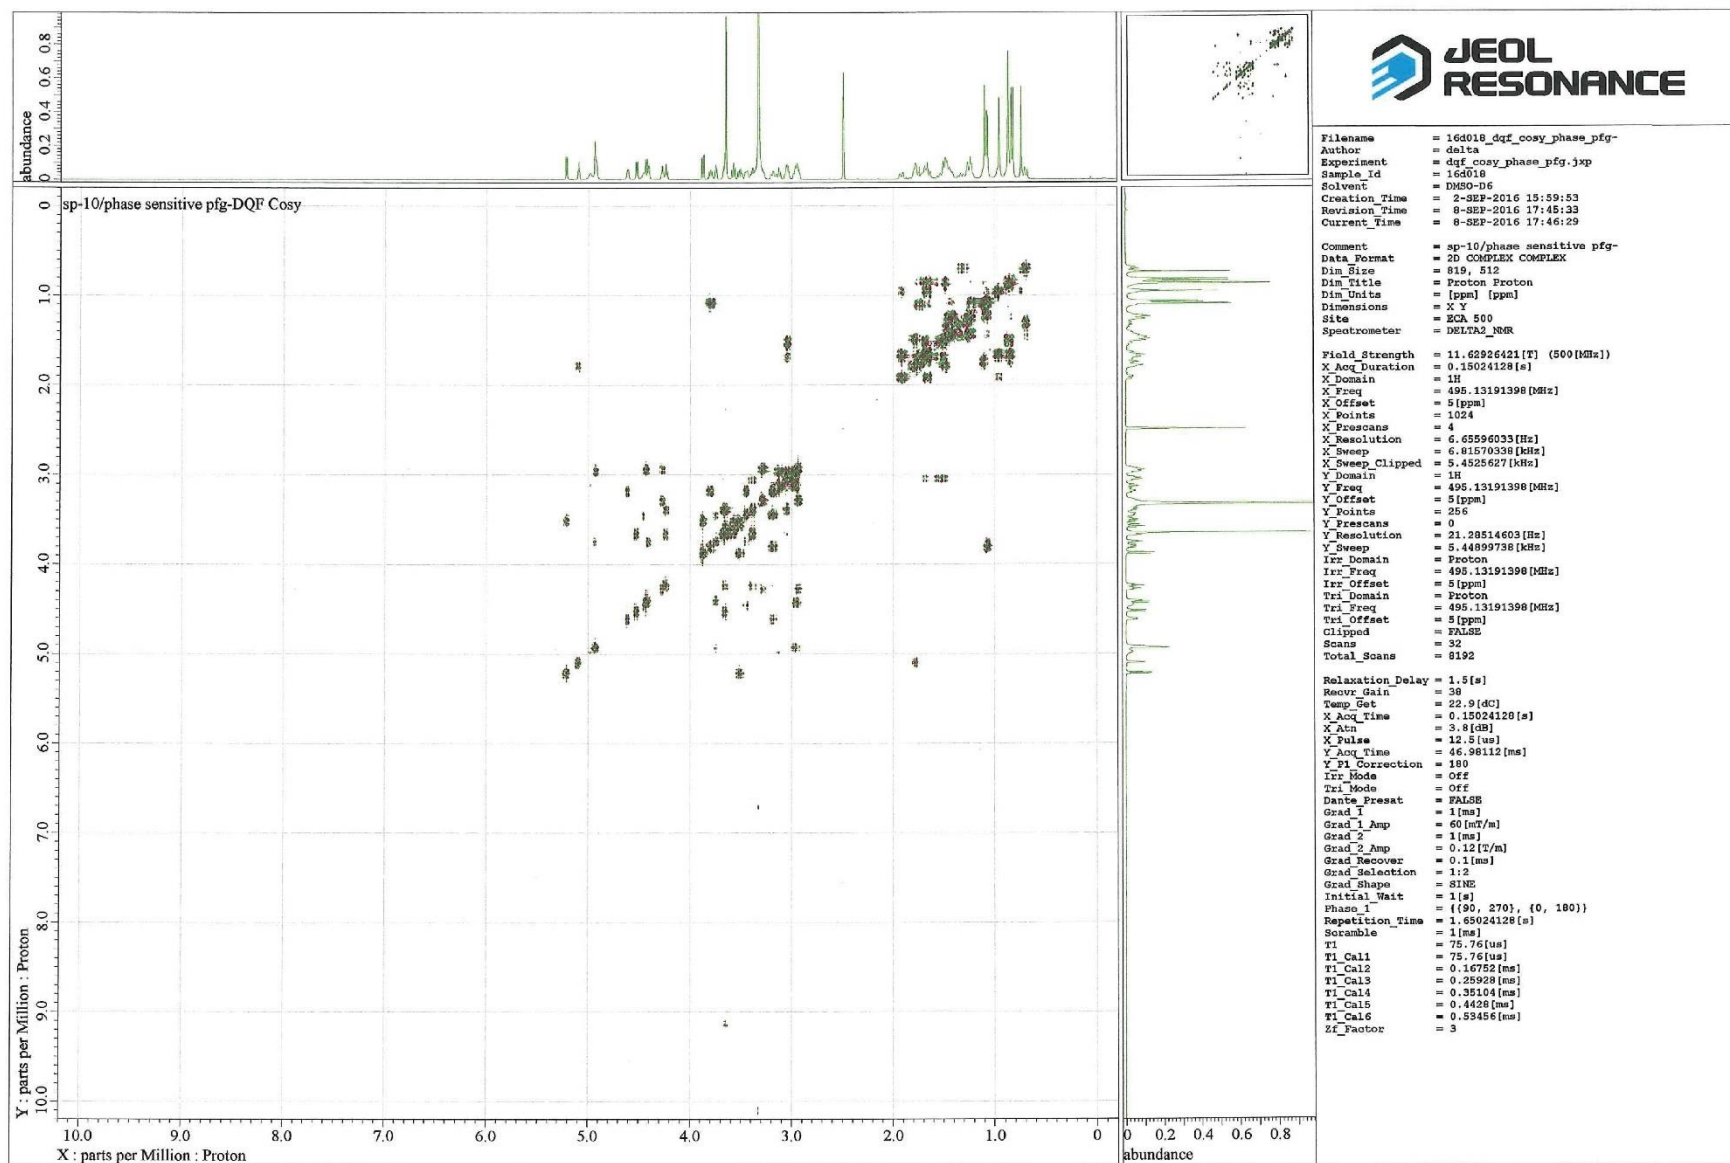

Figure 35. HMQC spectrum of erythronoside A methyl ester (4) in DMSO-*d*<sub>6</sub>.

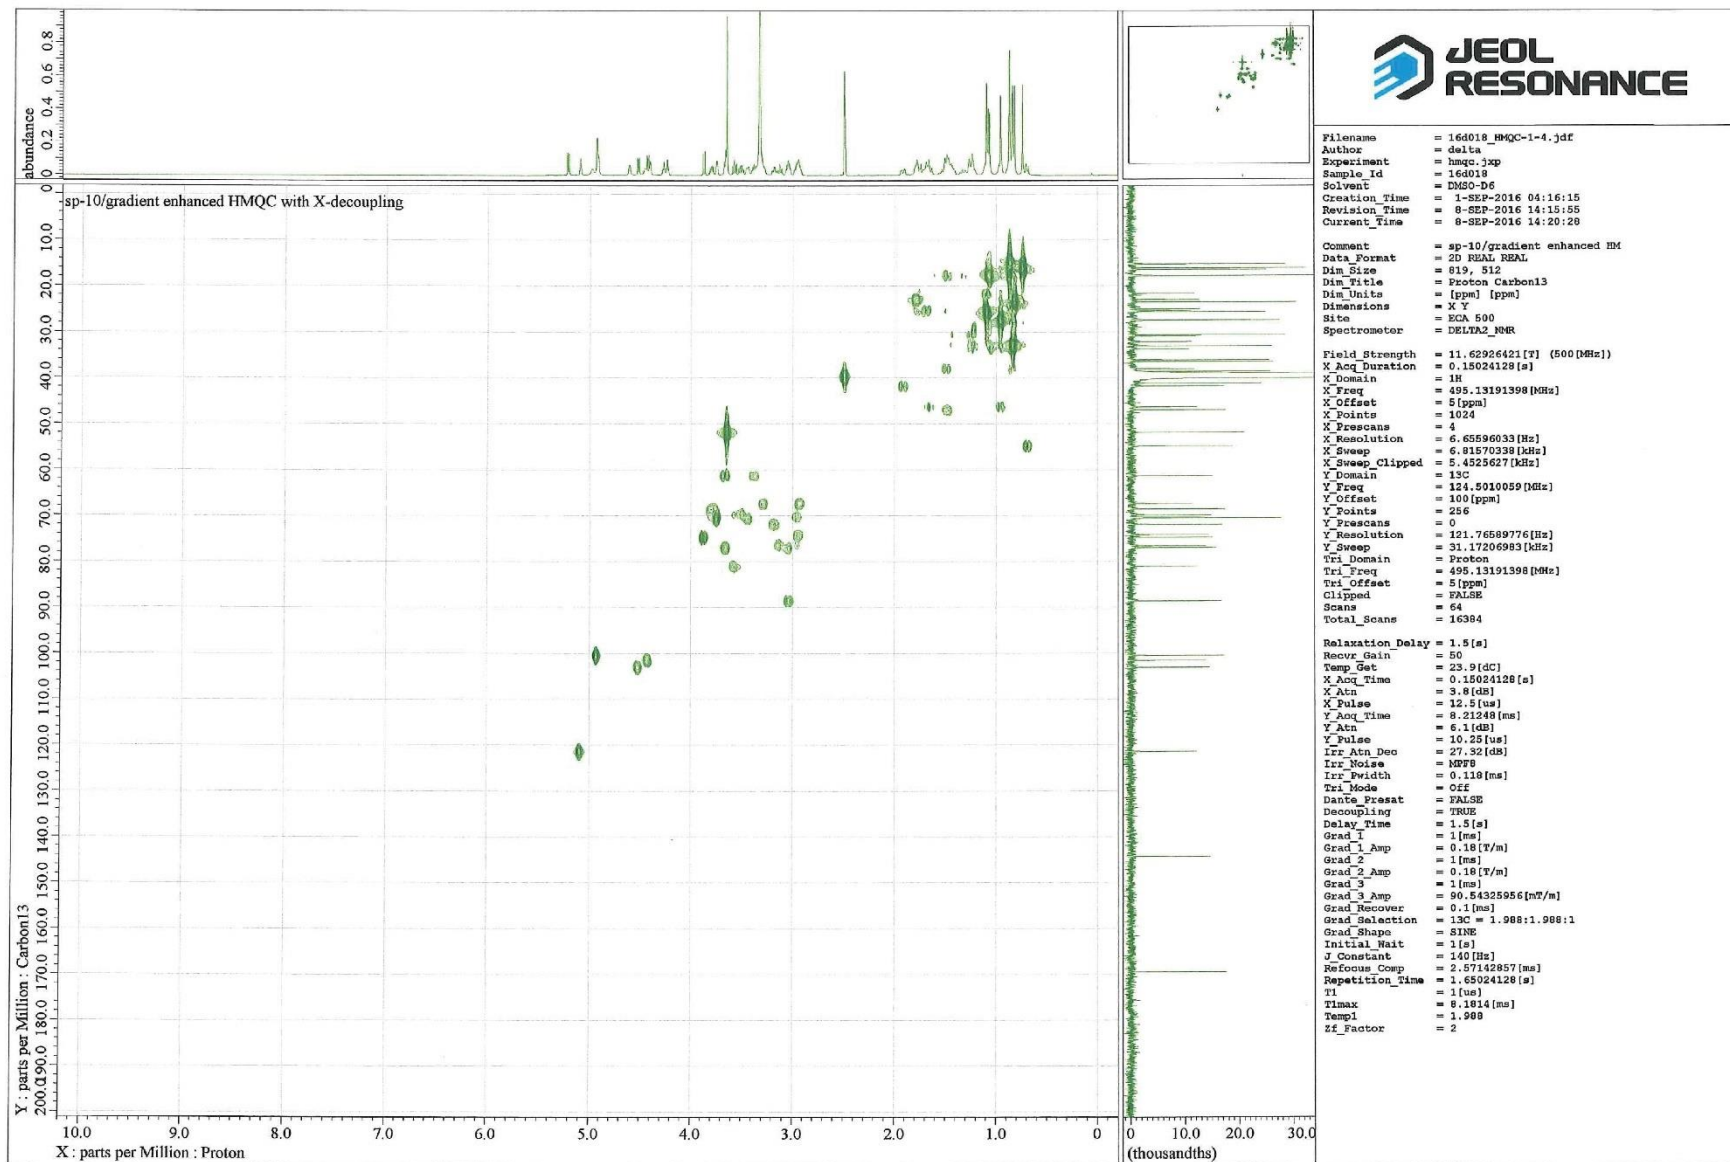

Figure 36. HMBC spectrum of erythronoside A methyl ester (4) in DMSO-*d*<sub>6</sub>.

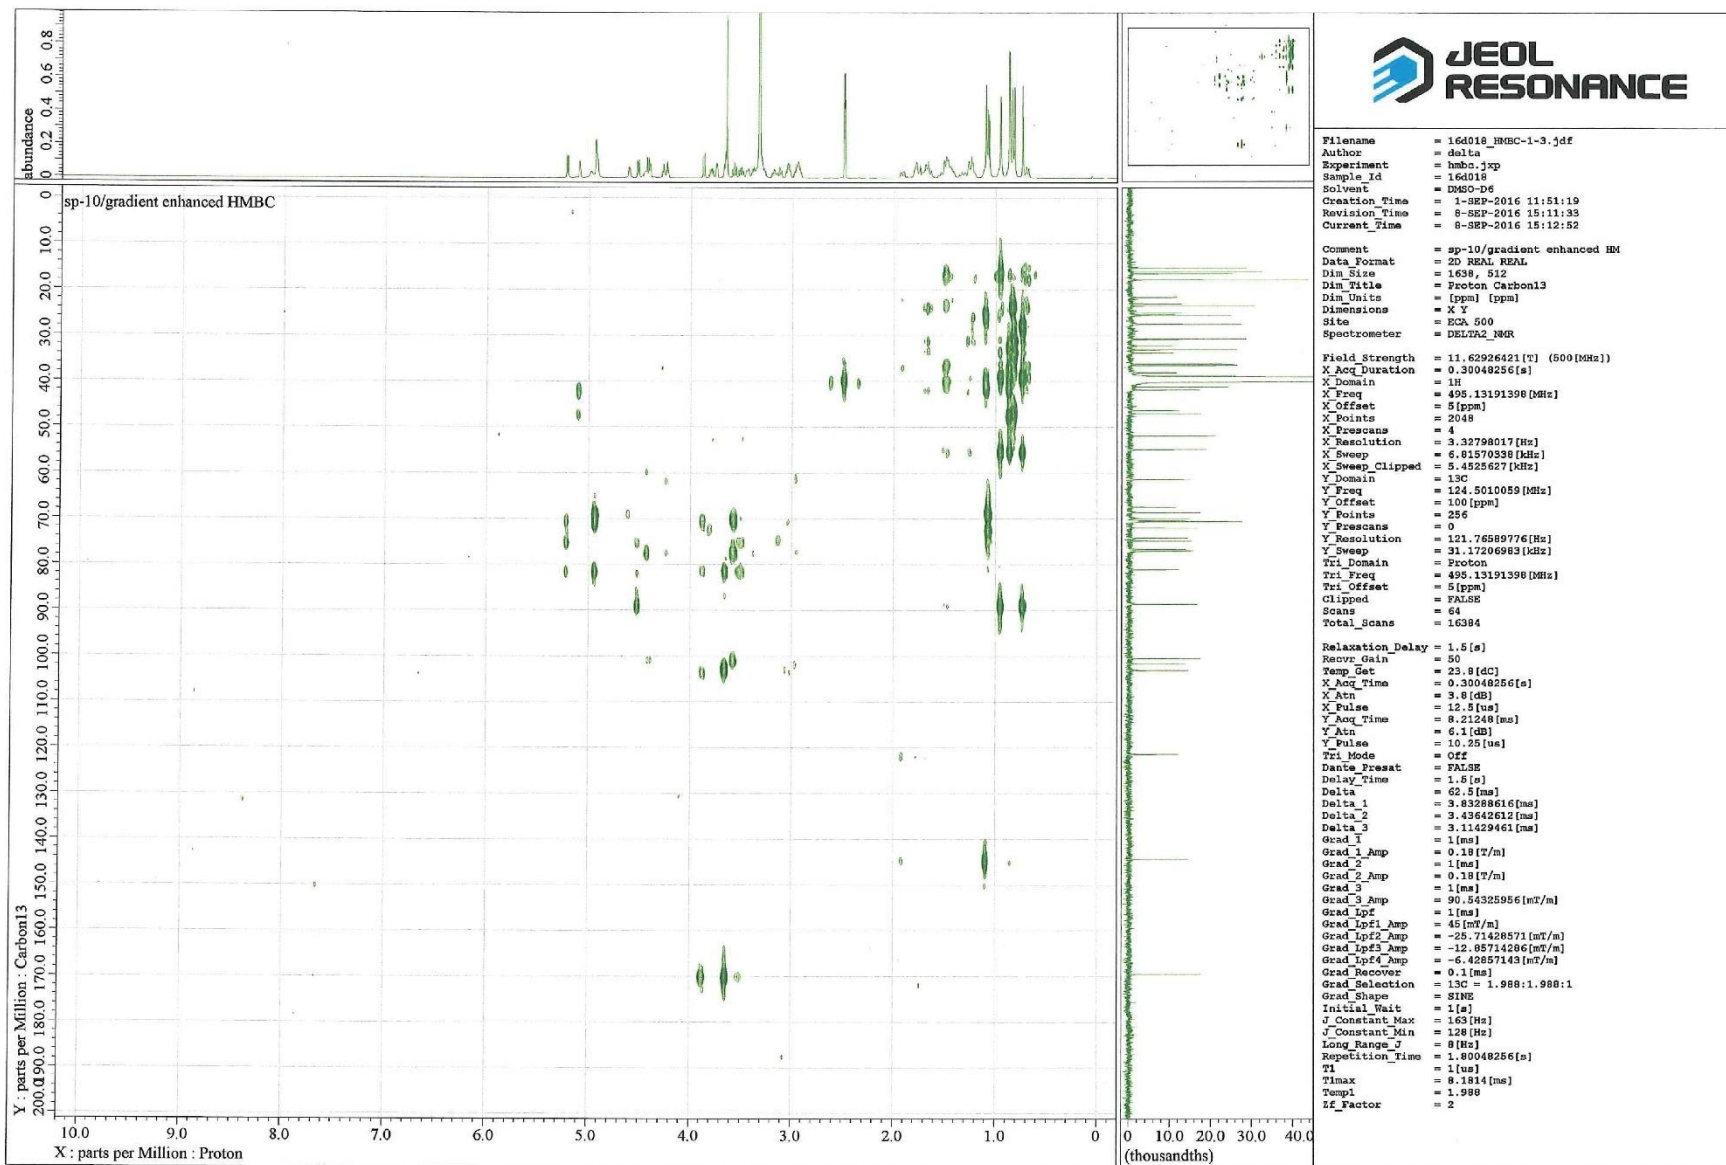

Figure 37. HSQC-TOCSY spectrum of erythronoside A methyl ester (4) in DMSO-*d*<sub>6</sub>.

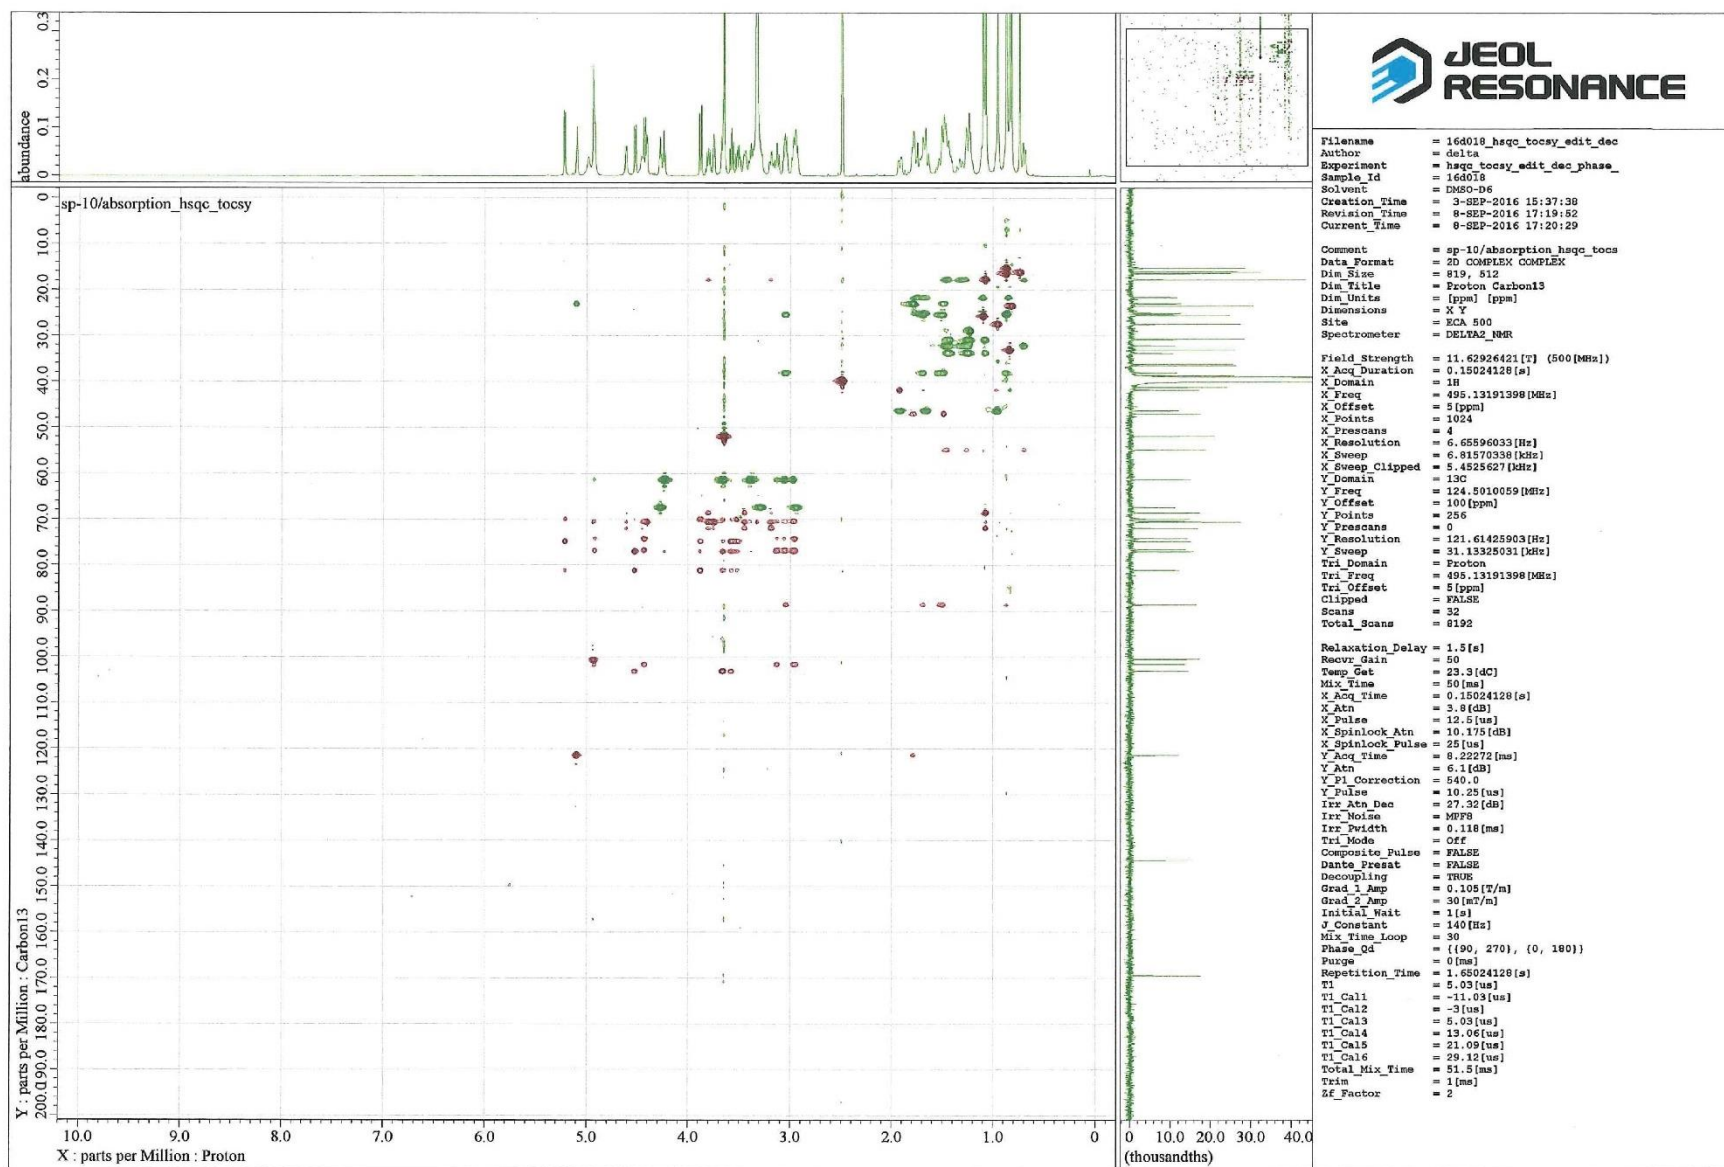

Figure 38. pfg-TOCSY spectrum of erythronoside A methyl ester (4) in DMSO-*d*<sub>6</sub>.

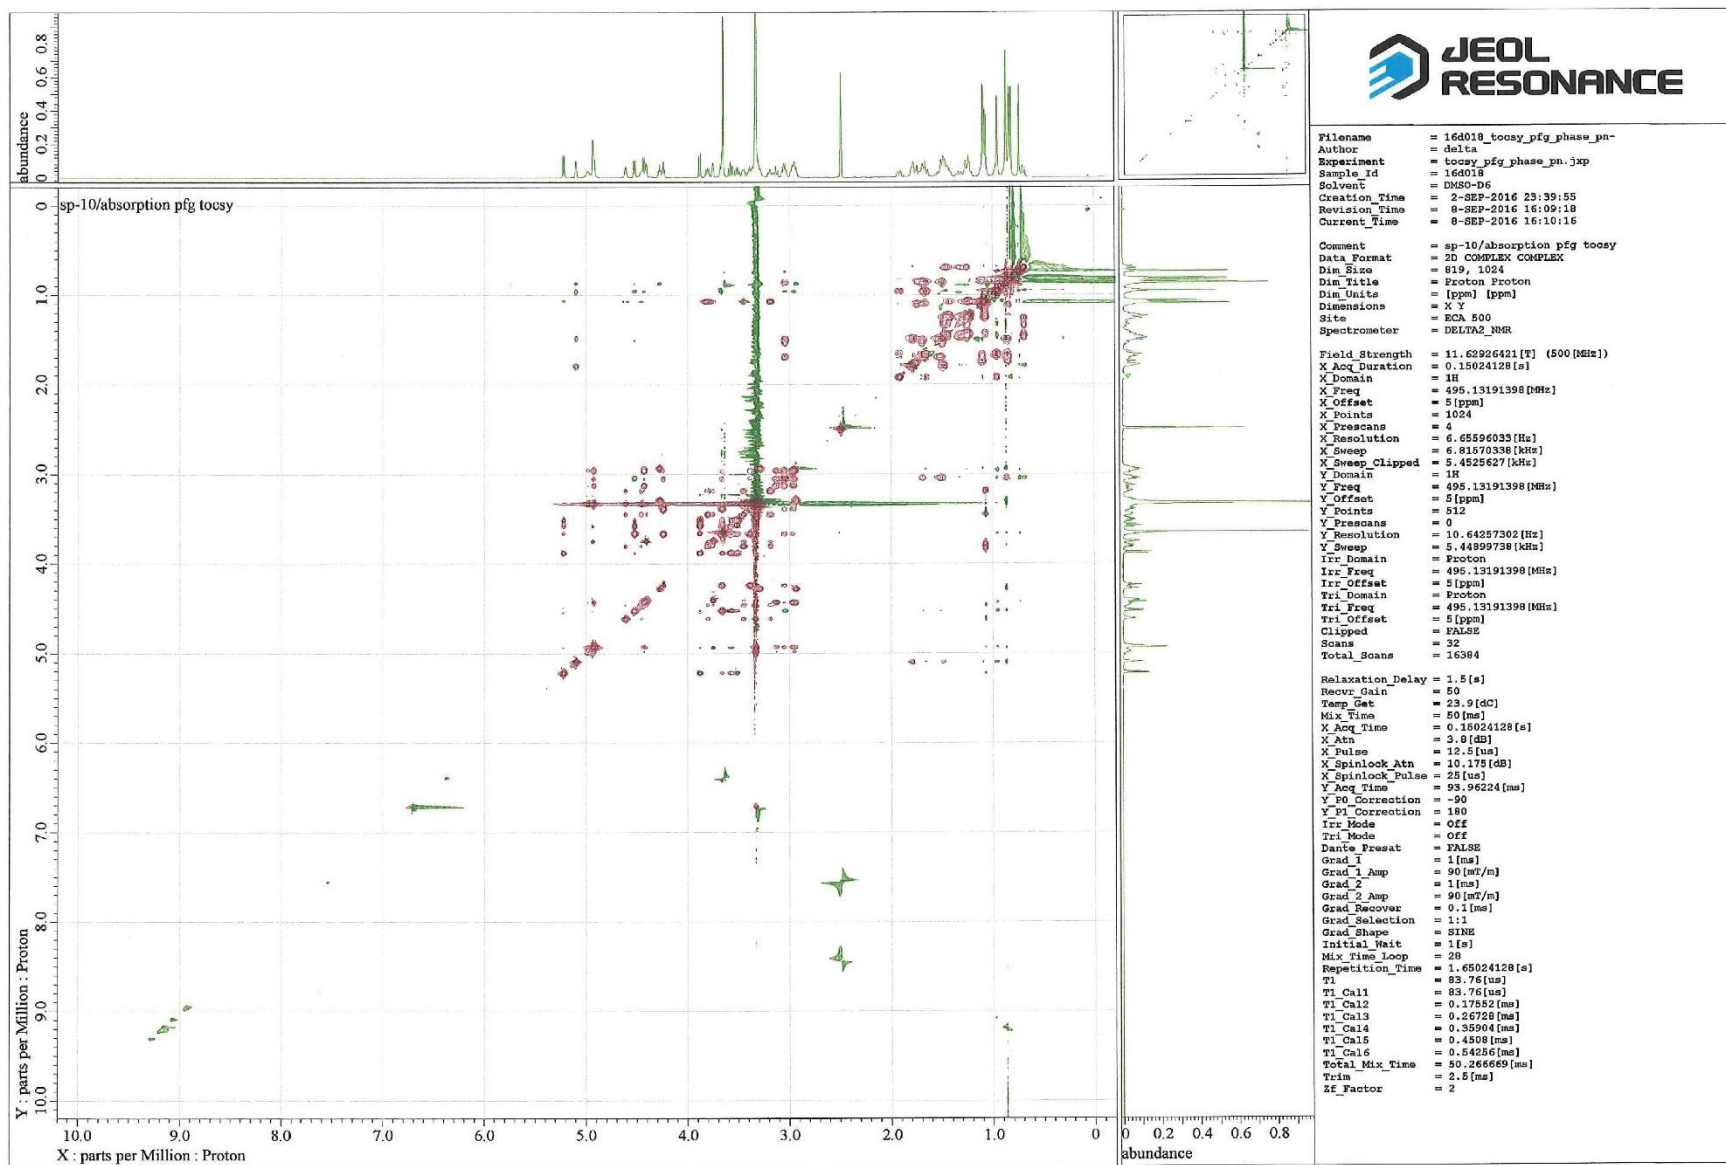



**Figure 40.**  $^1\text{H}$  NMR spectrum (500 MHz) of cochalinoside C (**5**) in  $\text{DMSO-}d_6$ .

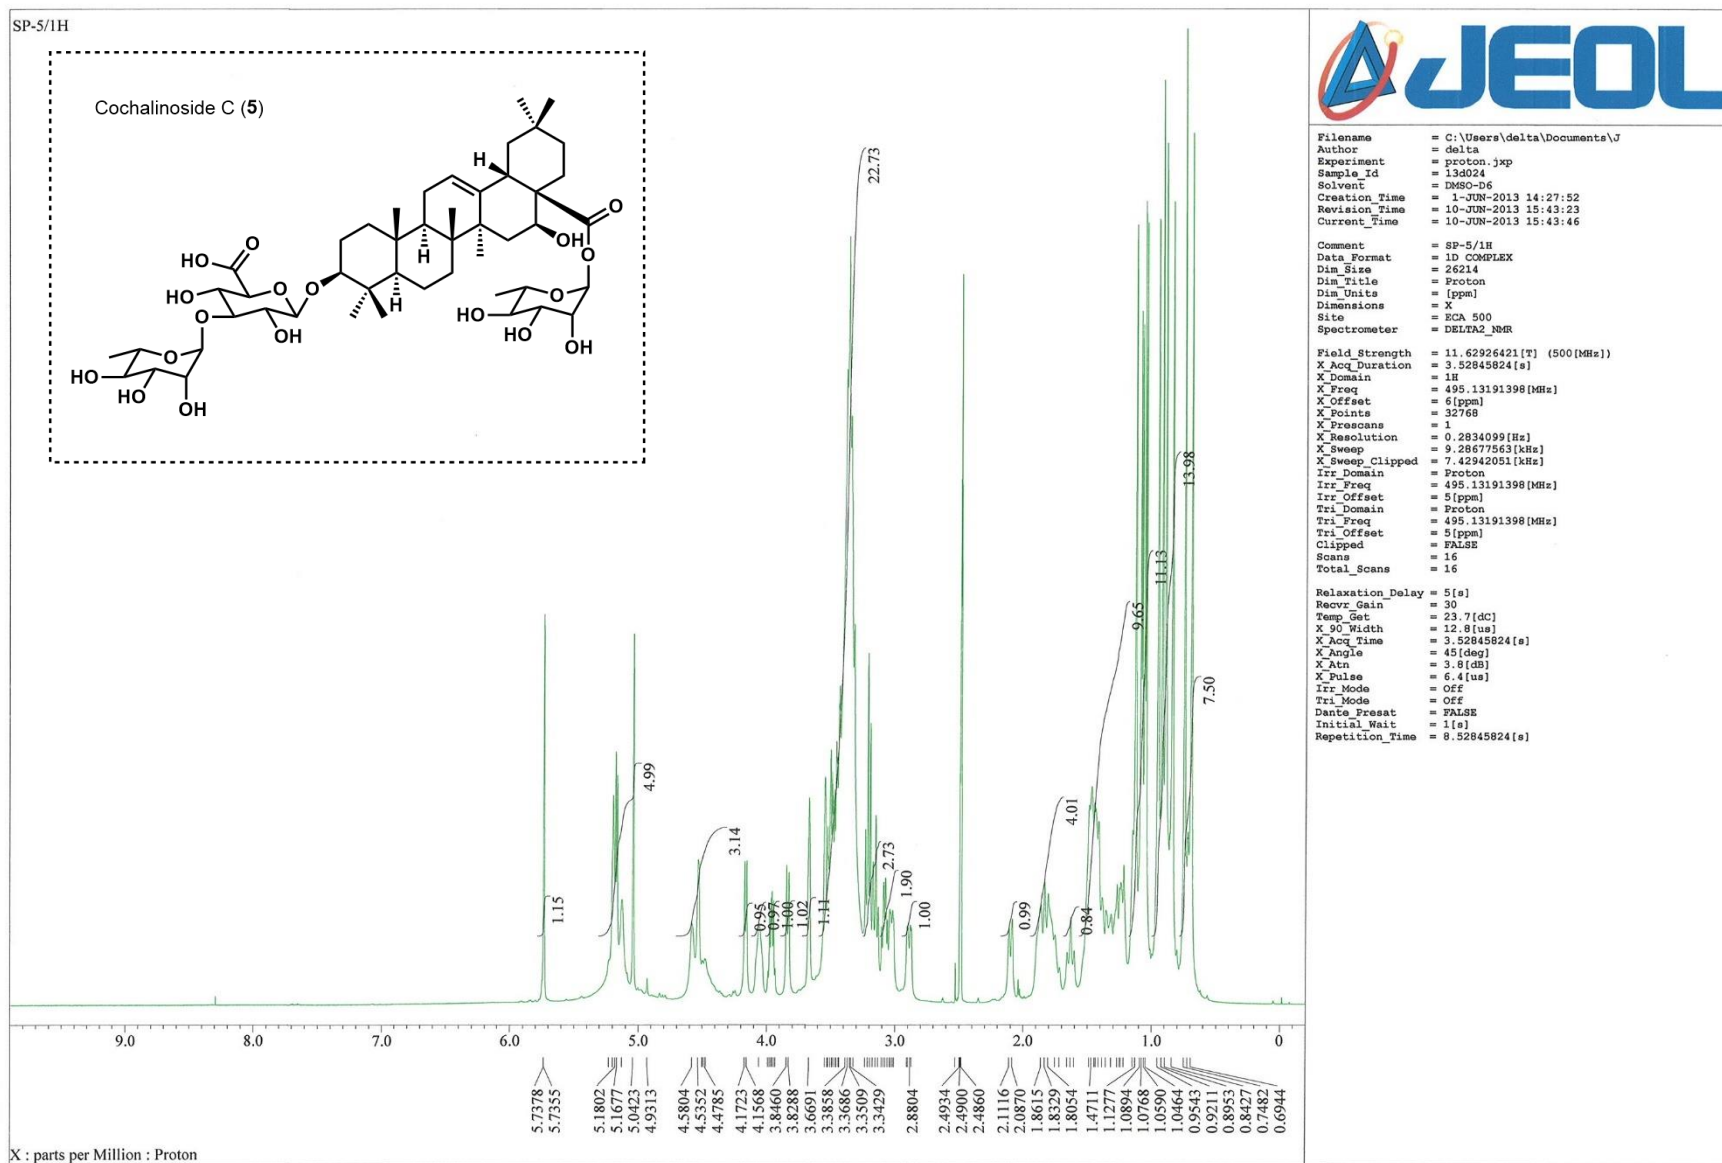

Figure 41.  $^{13}\text{C}$  NMR spectrum (125 MHz) of cochalinoside C (**5**) in  $\text{DMSO-}d_6$ .

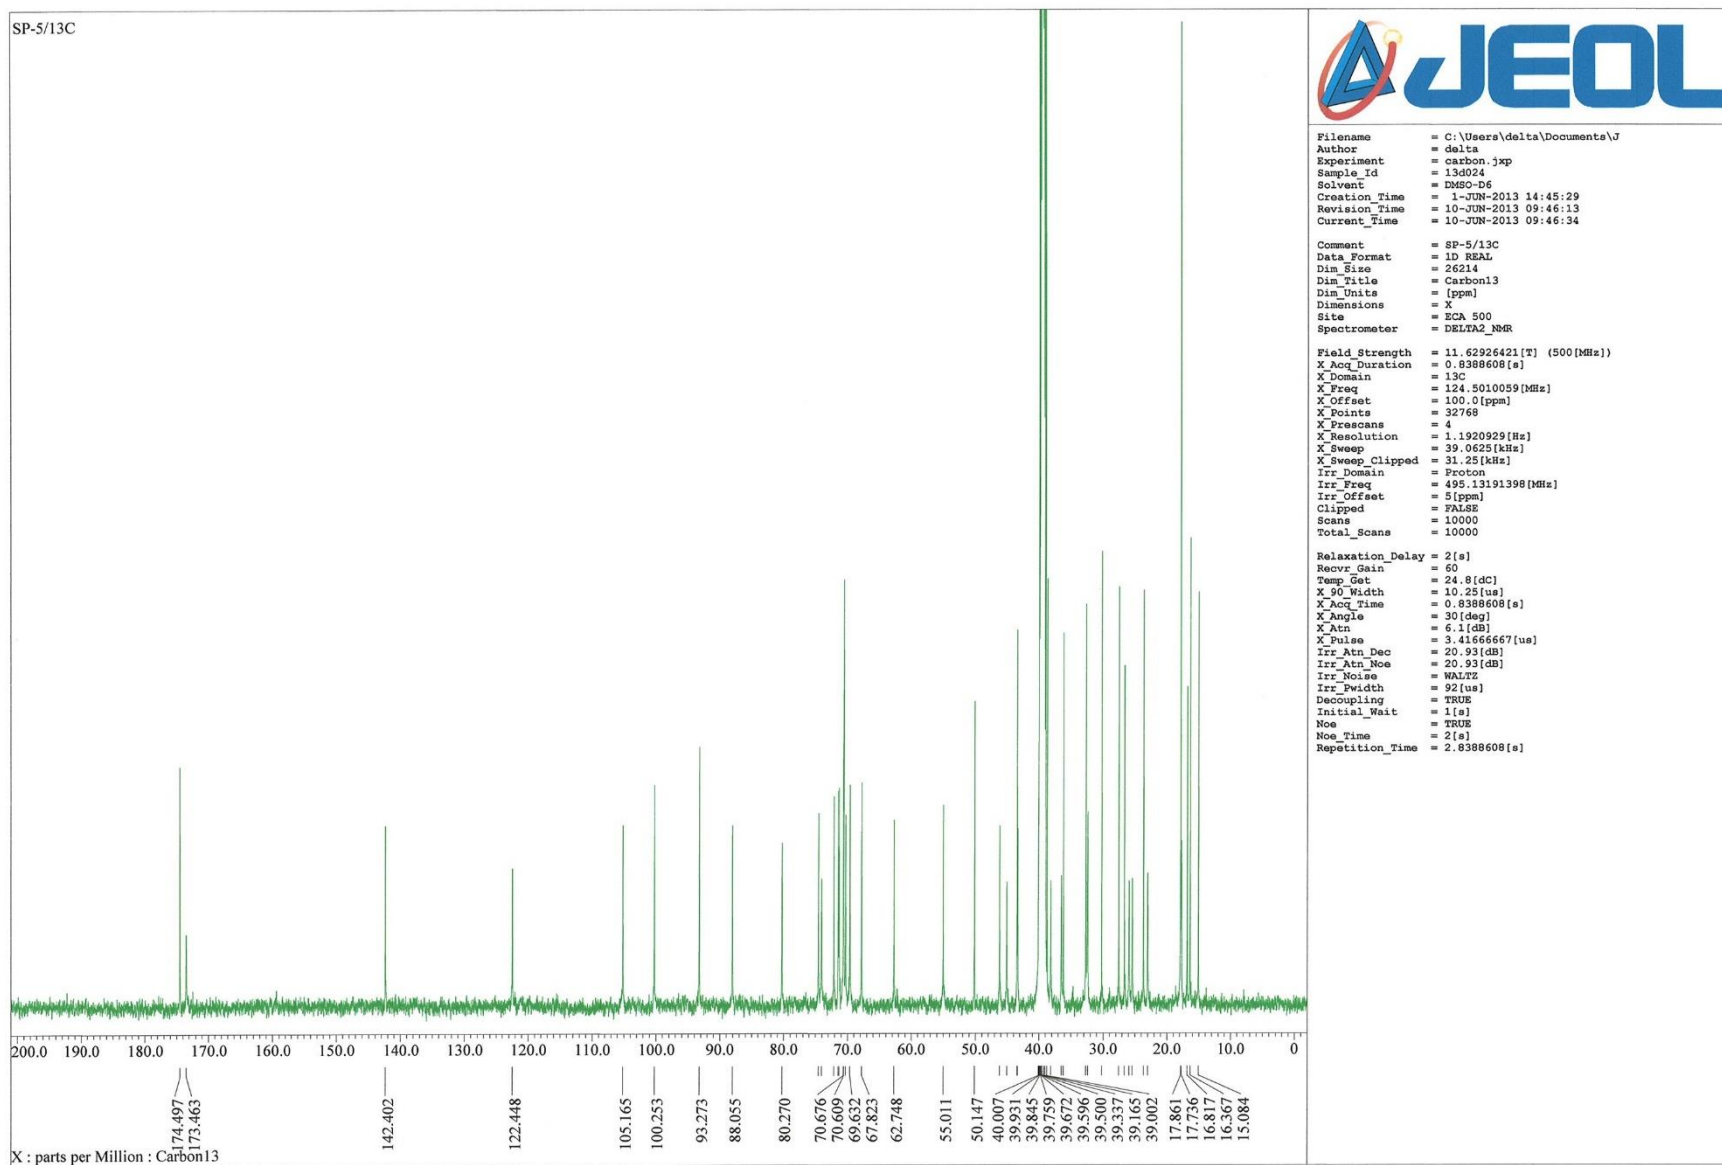



Figure 42. DEPT 90 and 135 pulse NMR spectra of cochalinoside C (5) in DMSO-*d*<sub>6</sub>.

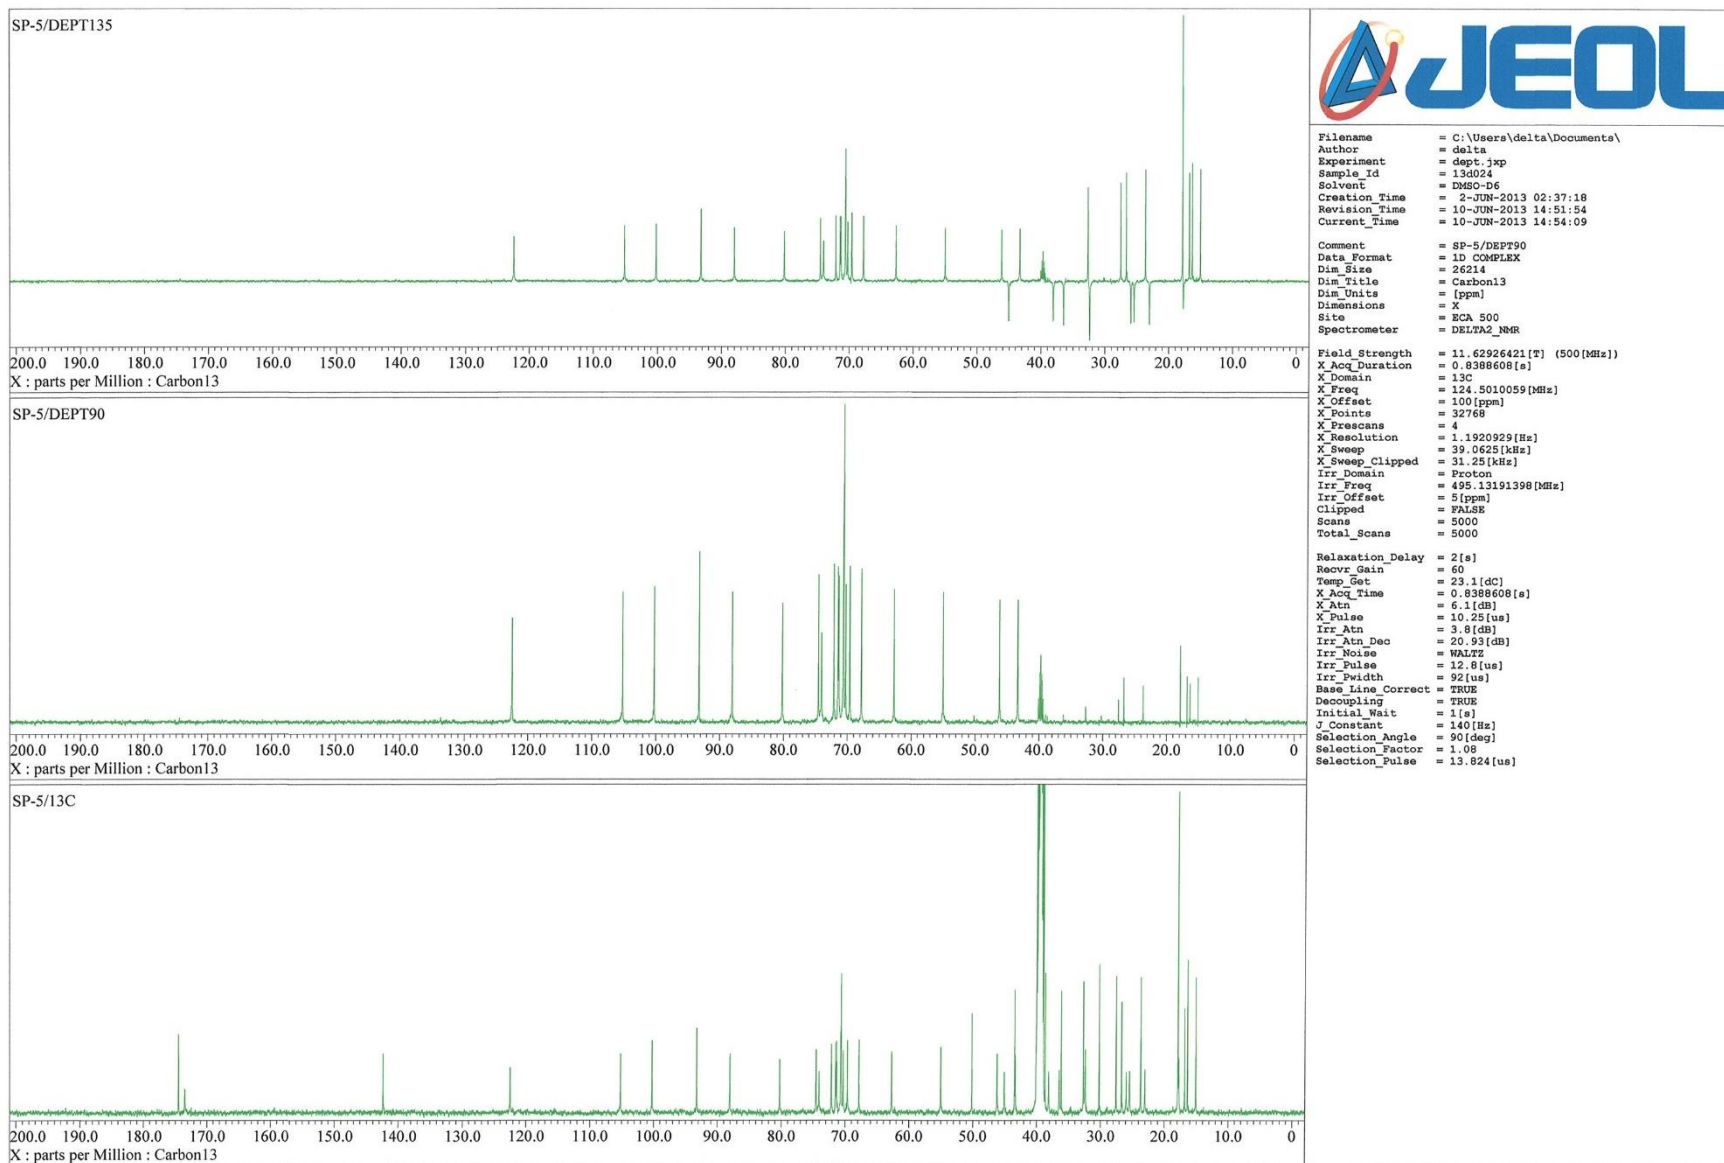

Figure 43. DQF-COSY spectrum of cochalinoside C (5) in DMSO-*d*<sub>6</sub>.

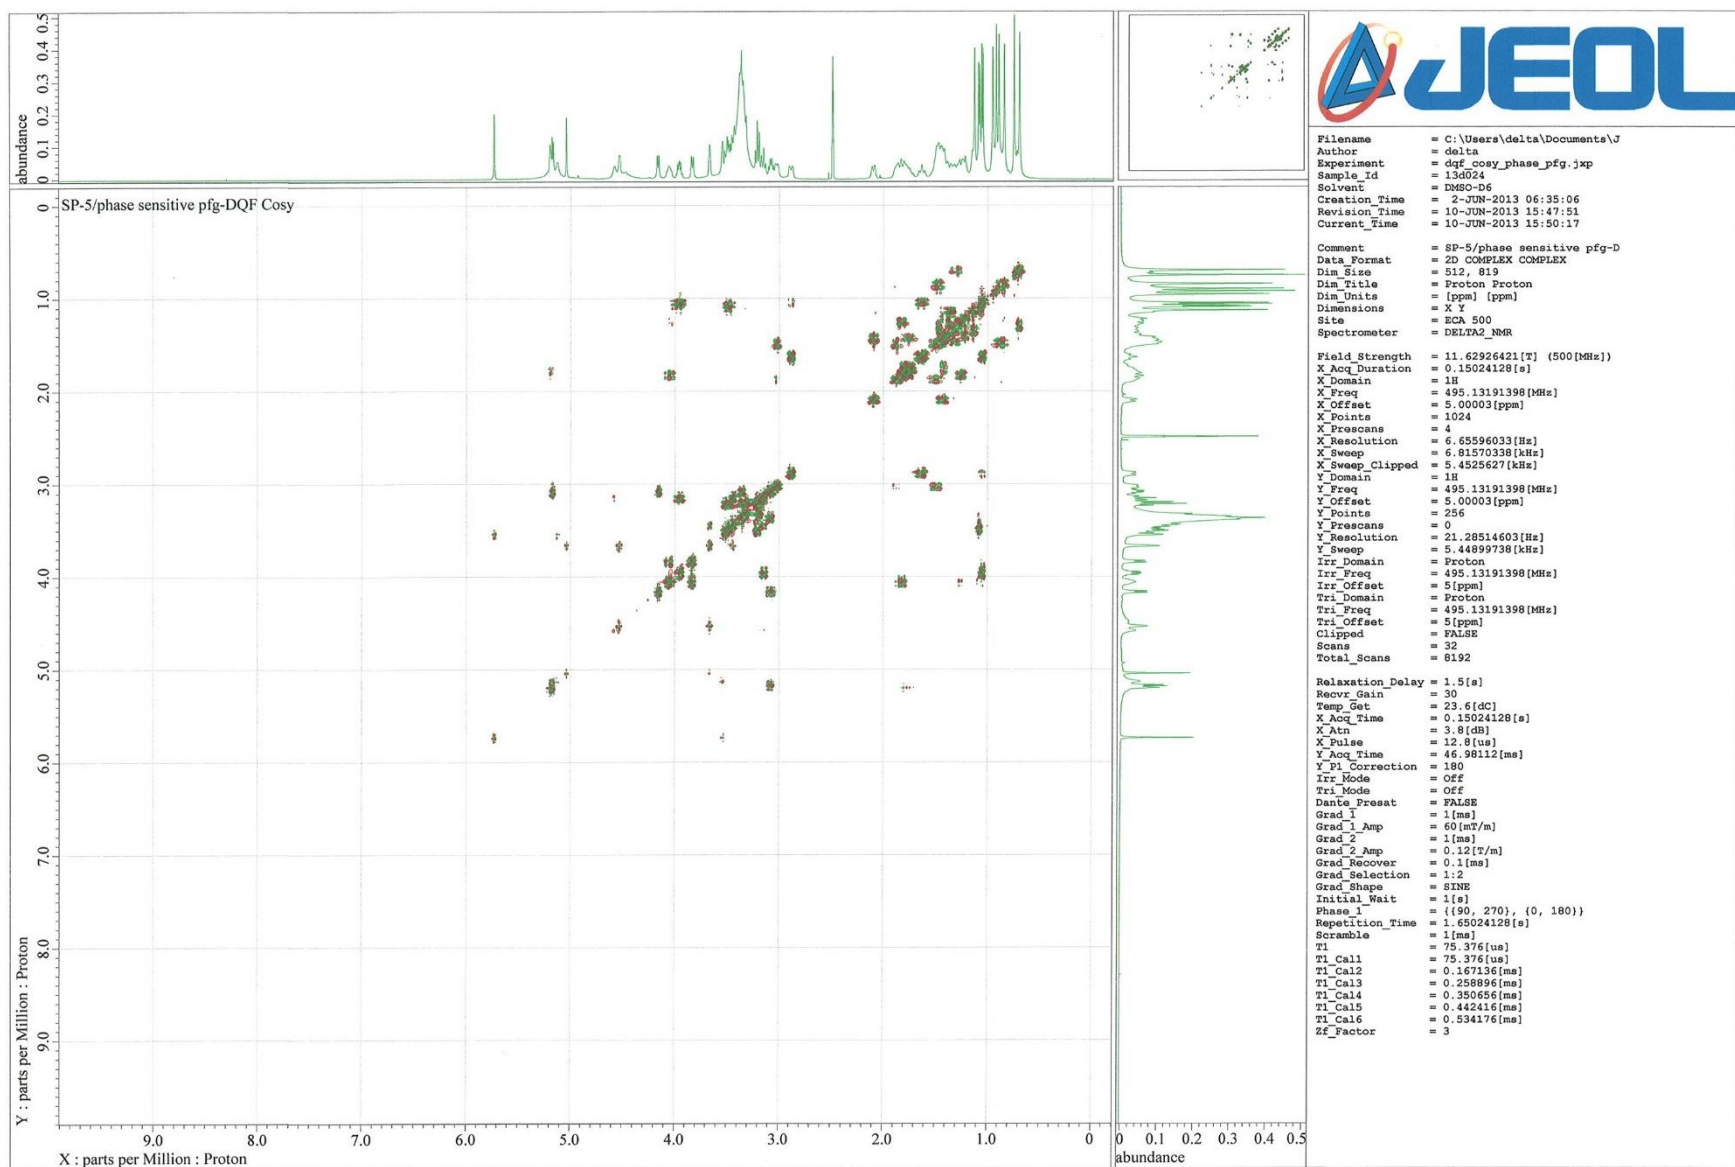

Figure 44. HMQC spectrum of cochalinoside C (5) in DMSO-*d*<sub>6</sub>.

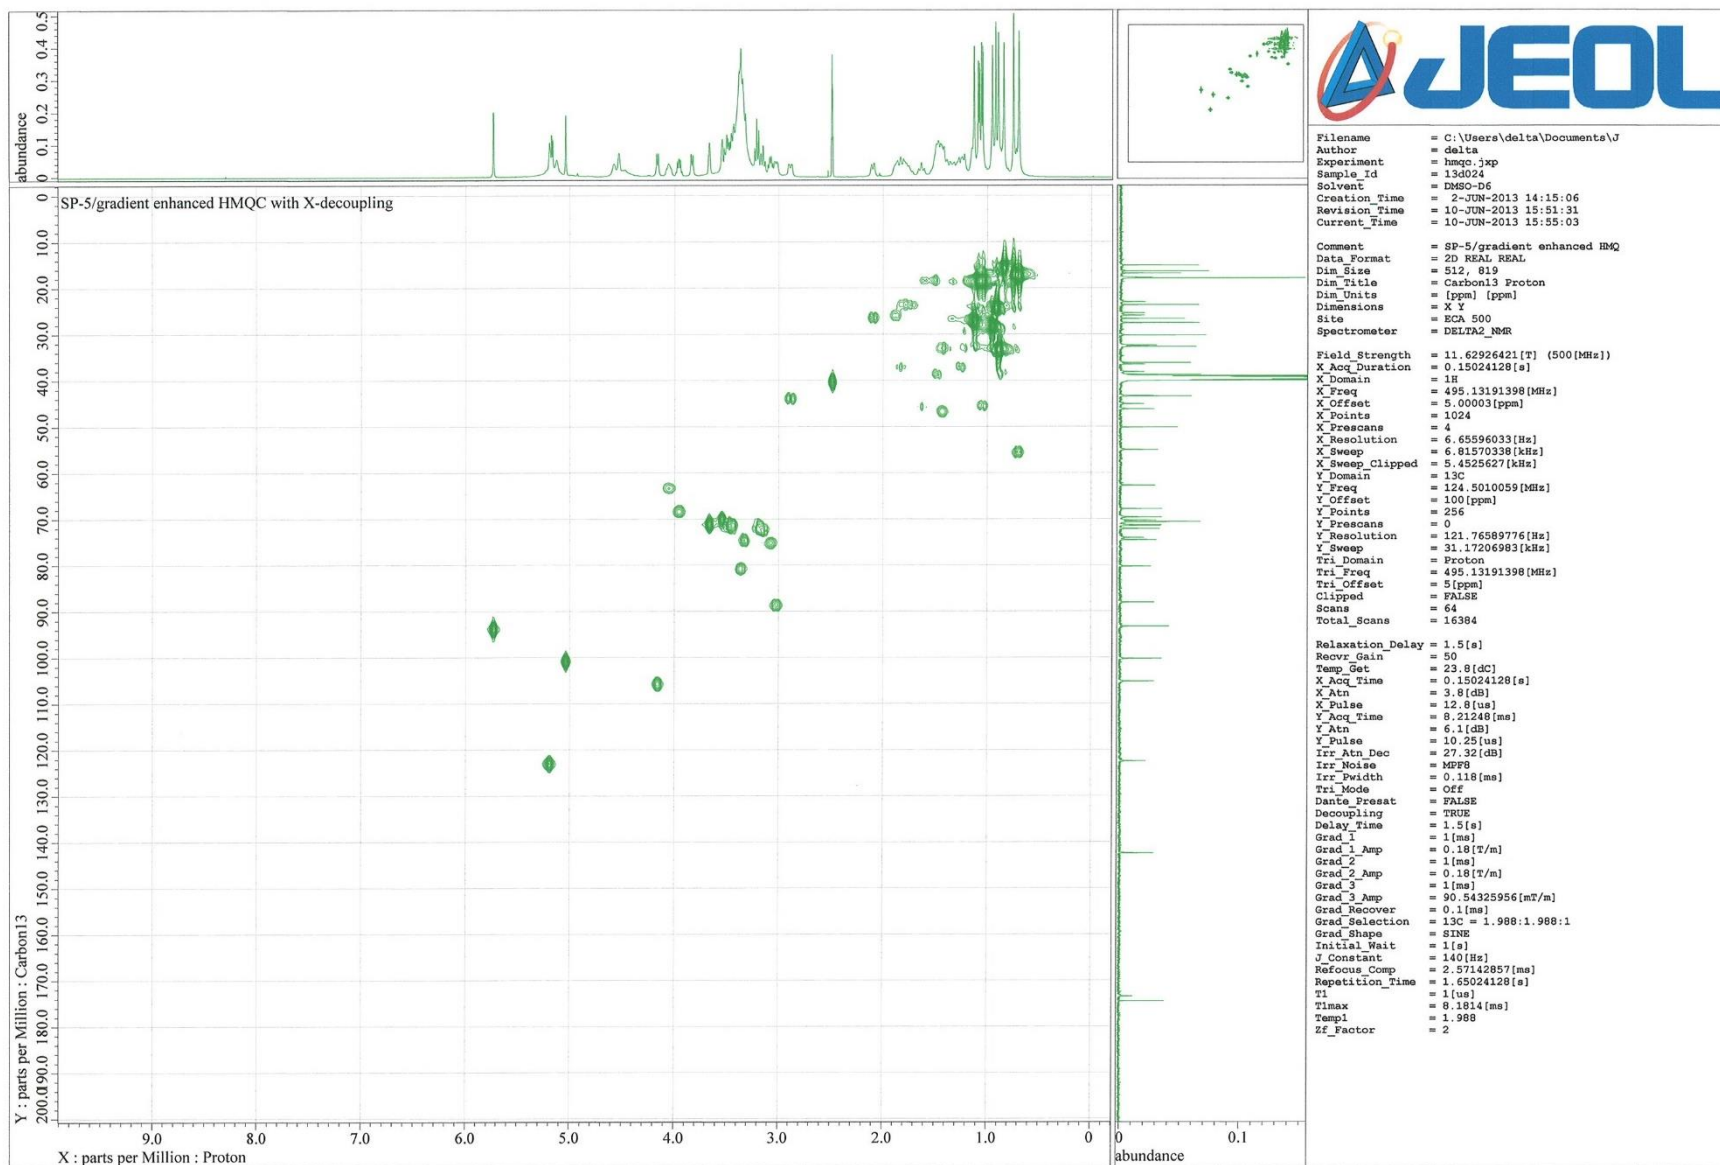

Figure 45. HMBC spectrum of cochalinoside C (5) in DMSO-*d*<sub>6</sub>.

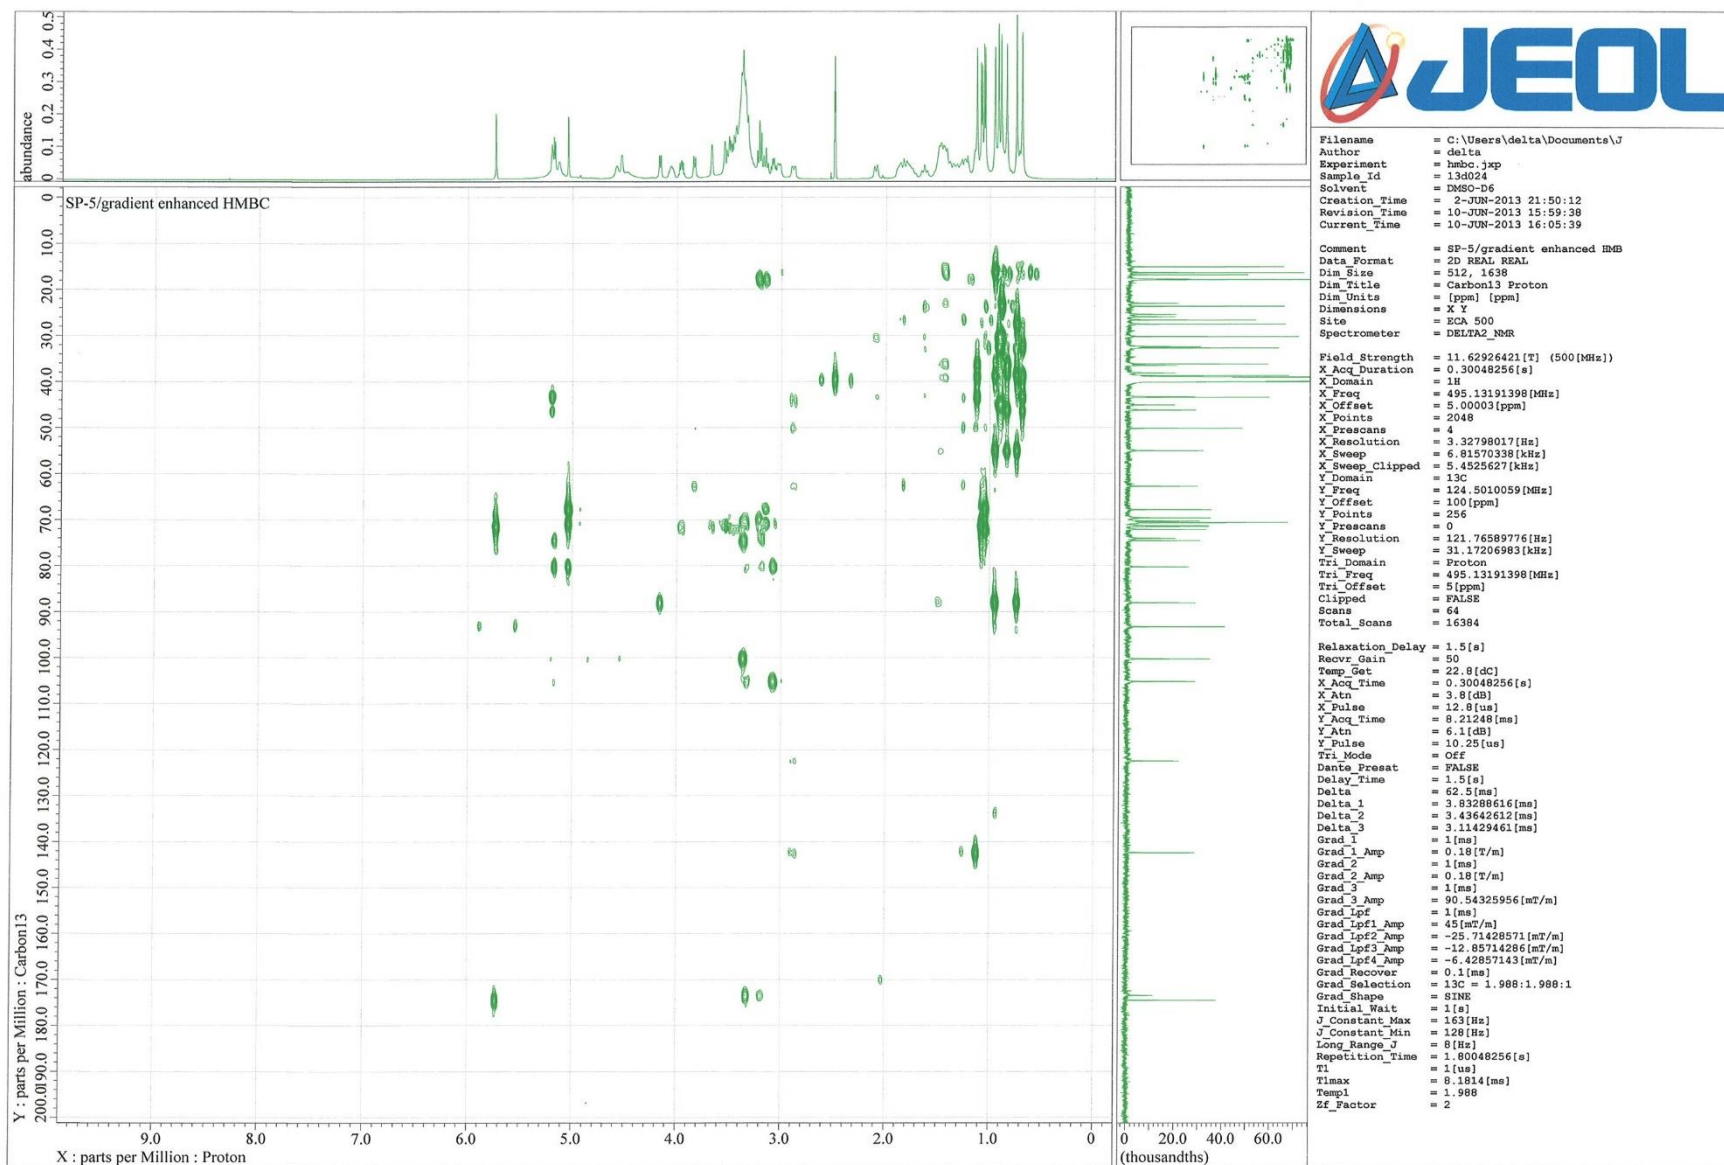

Figure 46. HSQC-TOCSY spectrum of cochalinoside C (5) in DMSO-*d*<sub>6</sub>.

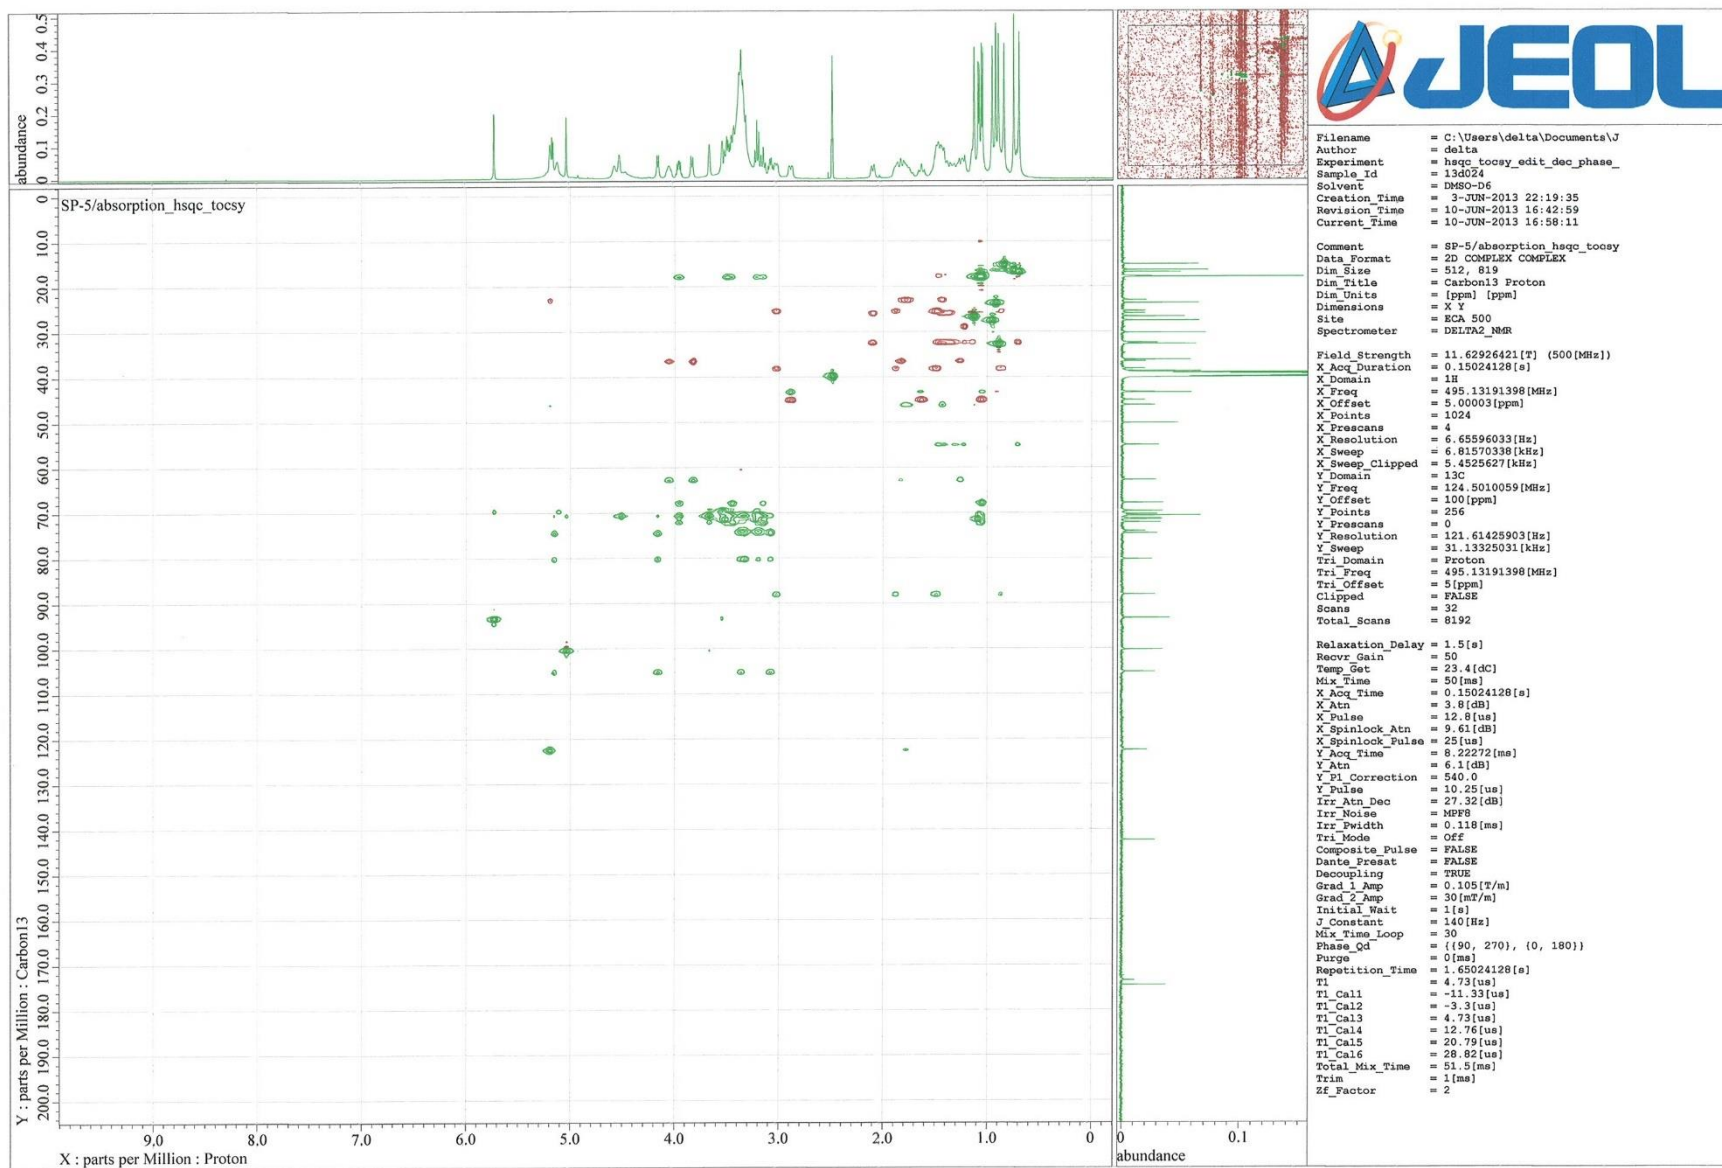

Figure 47. pfg-TOCSY spectrum of cochalinoside C (5) in DMSO-*d*<sub>6</sub>.

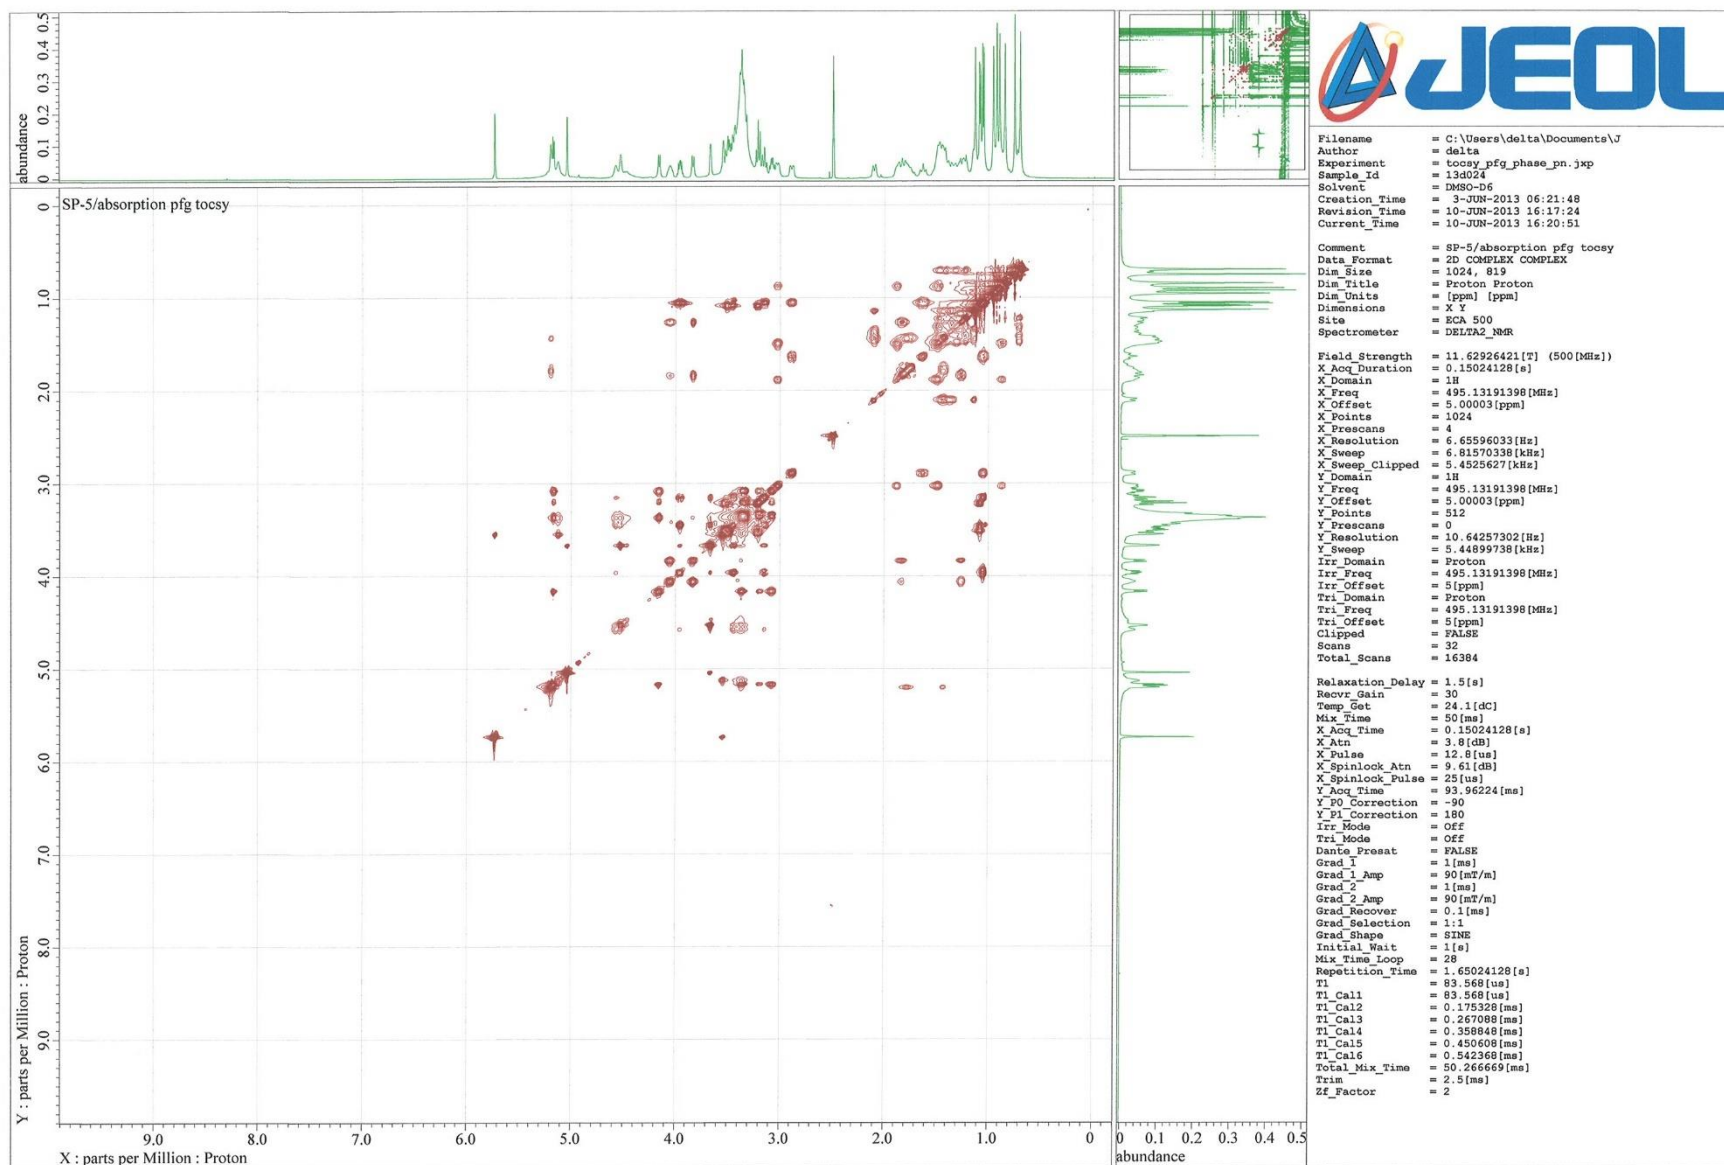

Figure 48. NOESY spectrum of cochalinoside C (5) in DMSO-*d*<sub>6</sub>.

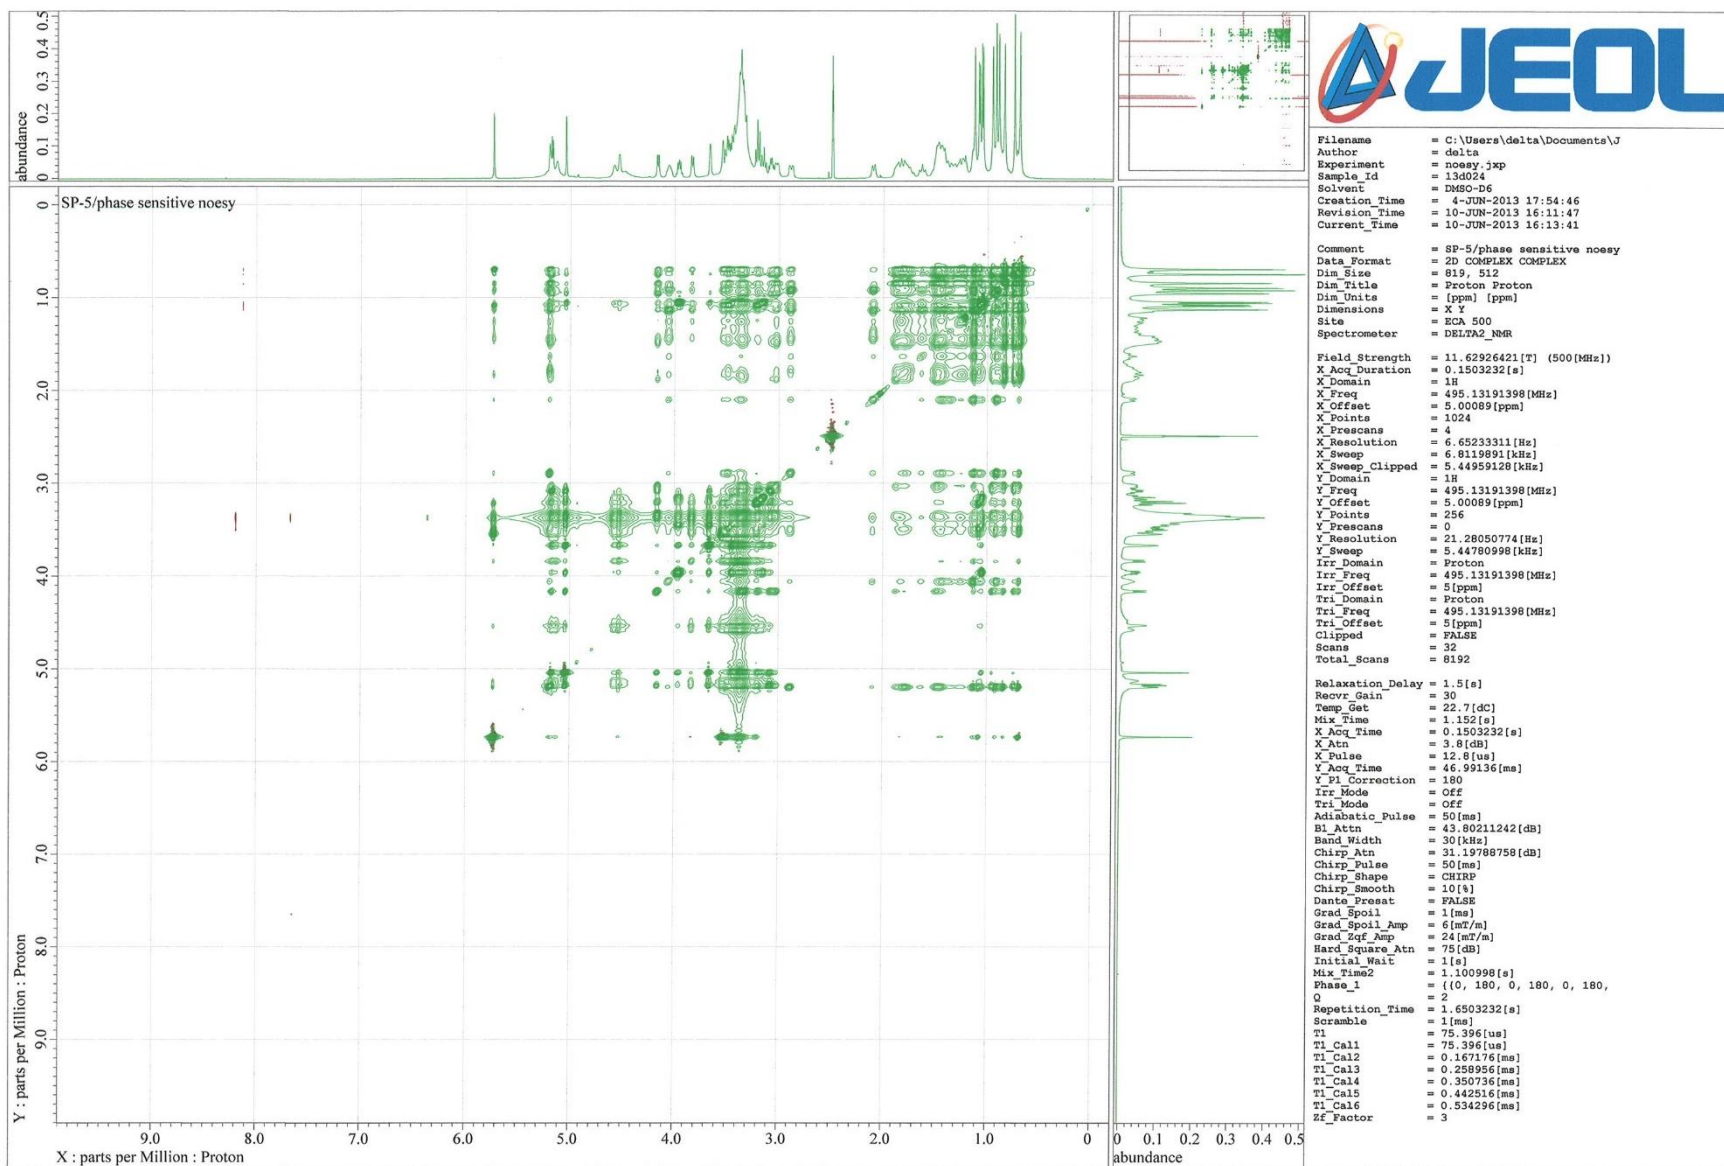

**Figure 49.**  $^1\text{H}$  NMR spectrum (500 MHz) of oleanolic acid 3-*O*- $\beta$ -D-xylopyranosyl-(1 $\rightarrow$ 2)- $\alpha$ -L-rhamnopyranosyl-(1 $\rightarrow$ 3)- $\beta$ -D-glucuronopyranosyl-28-*O*- $\beta$ -D-glucopyranoside (**6**) in  $\text{DMSO-}d_6$ .

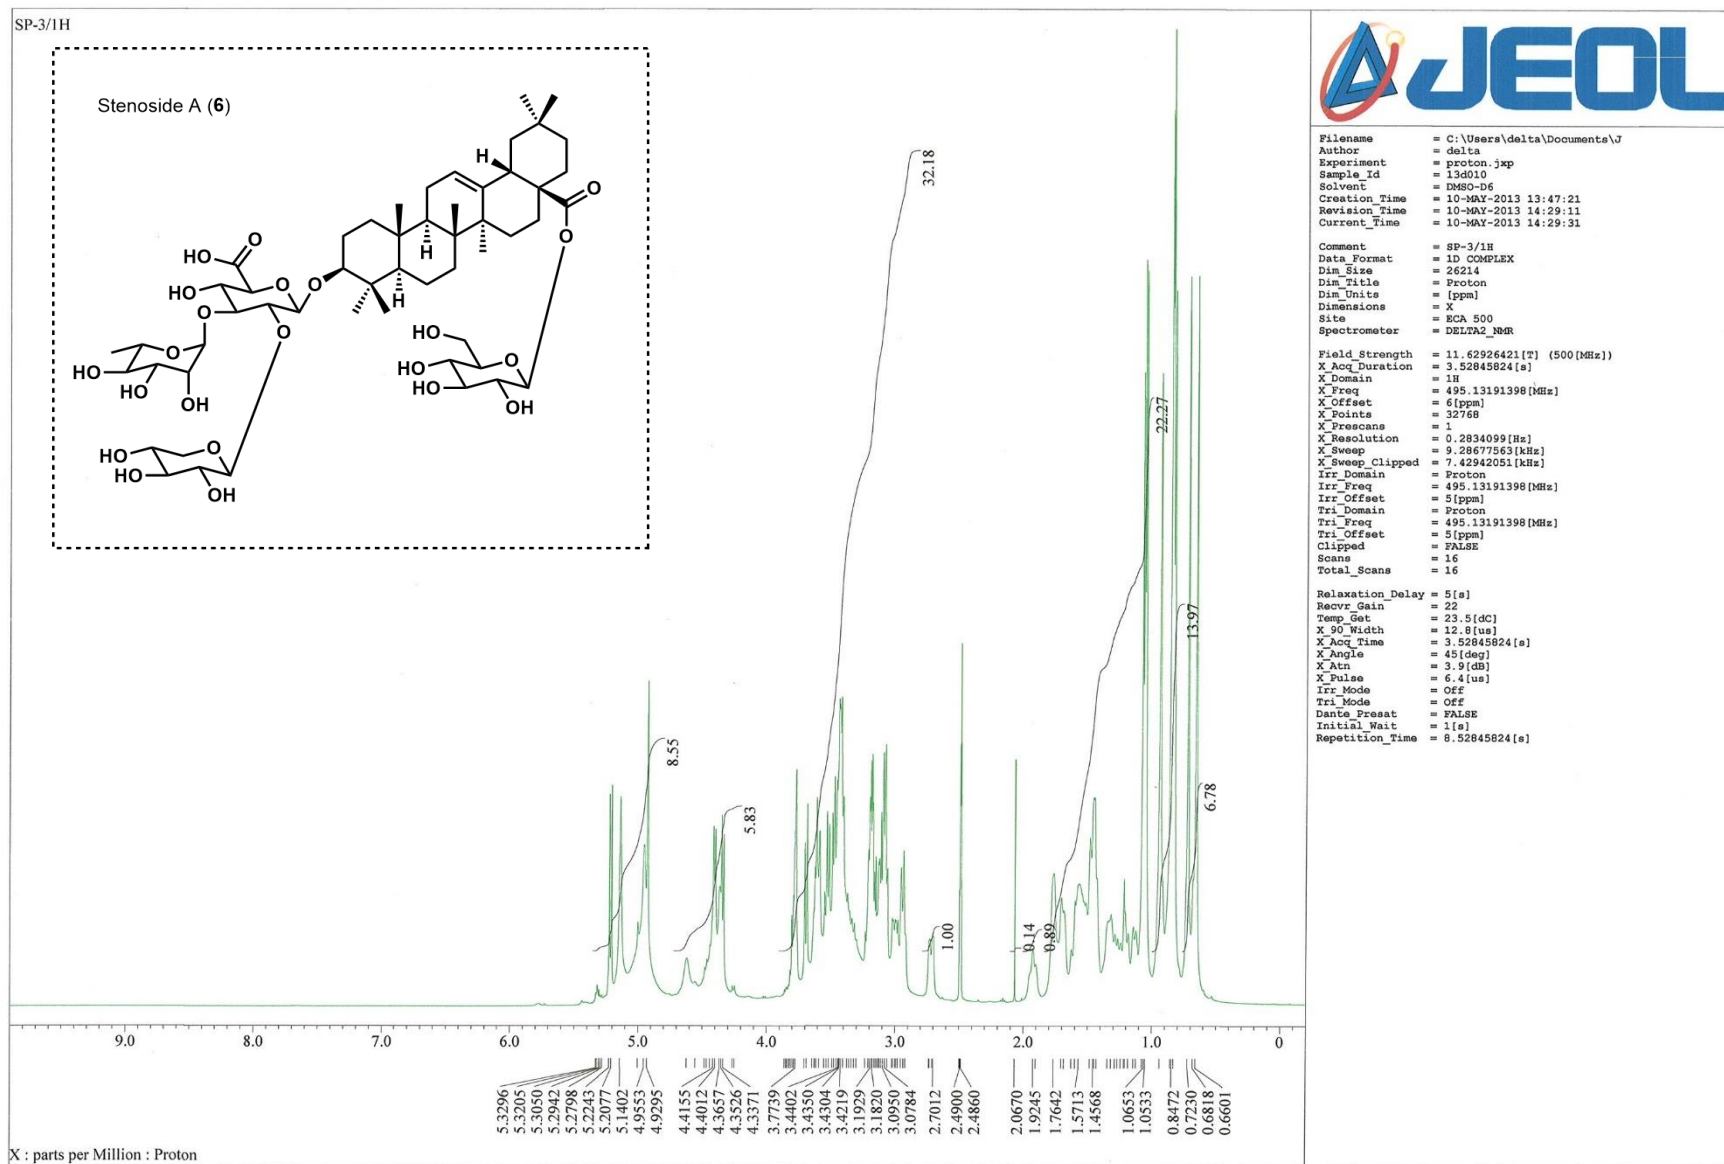



**Figure 50.**  $^{13}\text{C}$  NMR spectrum (125 MHz) of oleanolic acid 3-*O*- $\beta$ -D-xylopyranosyl-(1 $\rightarrow$ 2)- $\alpha$ -L-rhamnopyranosyl-(1 $\rightarrow$ 3)- $\beta$ -D-glucuronopyranosyl-28-*O*- $\beta$ -D-glucopyranoside (**6**) in DMSO- $d_6$ .

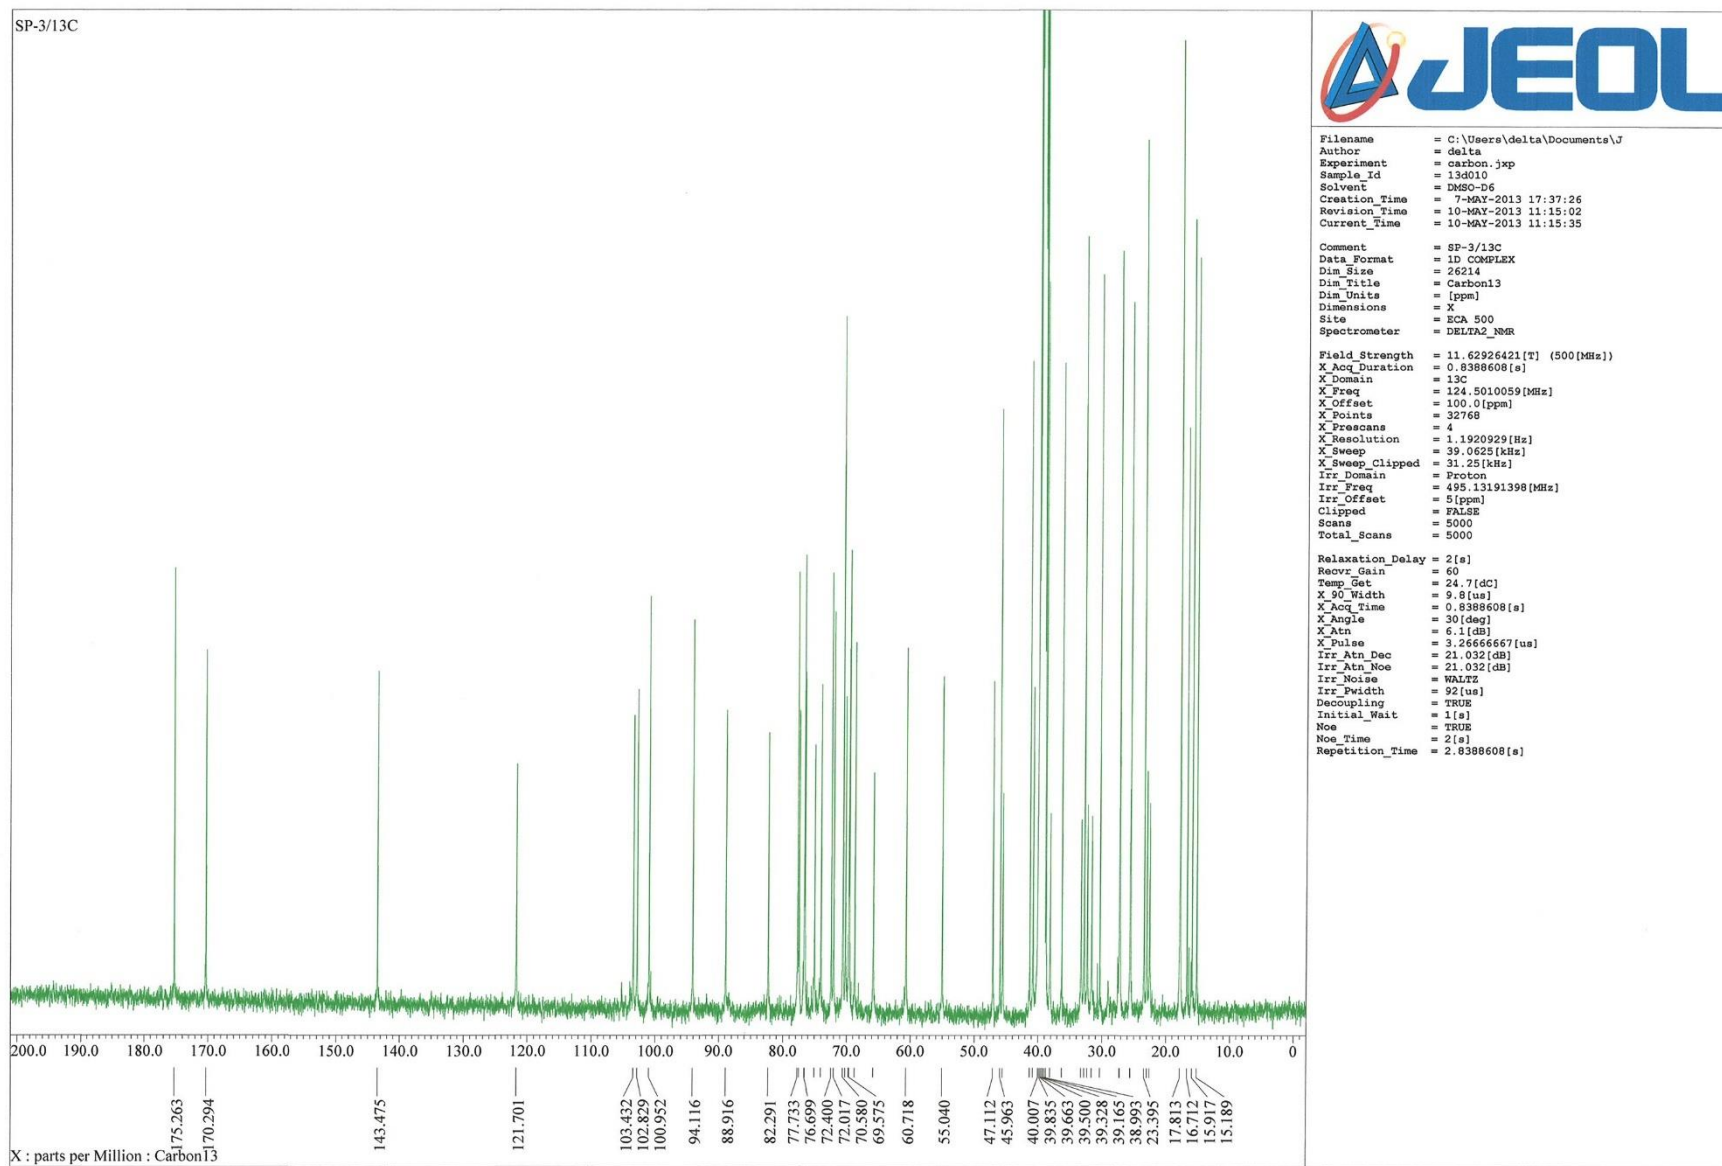

**Figure 51.** DEPT 90 and 135 pulse NMR spectra of oleanolic acid 3-*O*- $\beta$ -D-xylopyranosyl-(1 $\rightarrow$ 2)- $\alpha$ -L-rhamnopyranosyl-(1 $\rightarrow$ 3)- $\beta$ -D-glucuronopyranosyl-28-*O*- $\beta$ -D-glucopyranoside (**6**) in DMSO-*d*<sub>6</sub>.

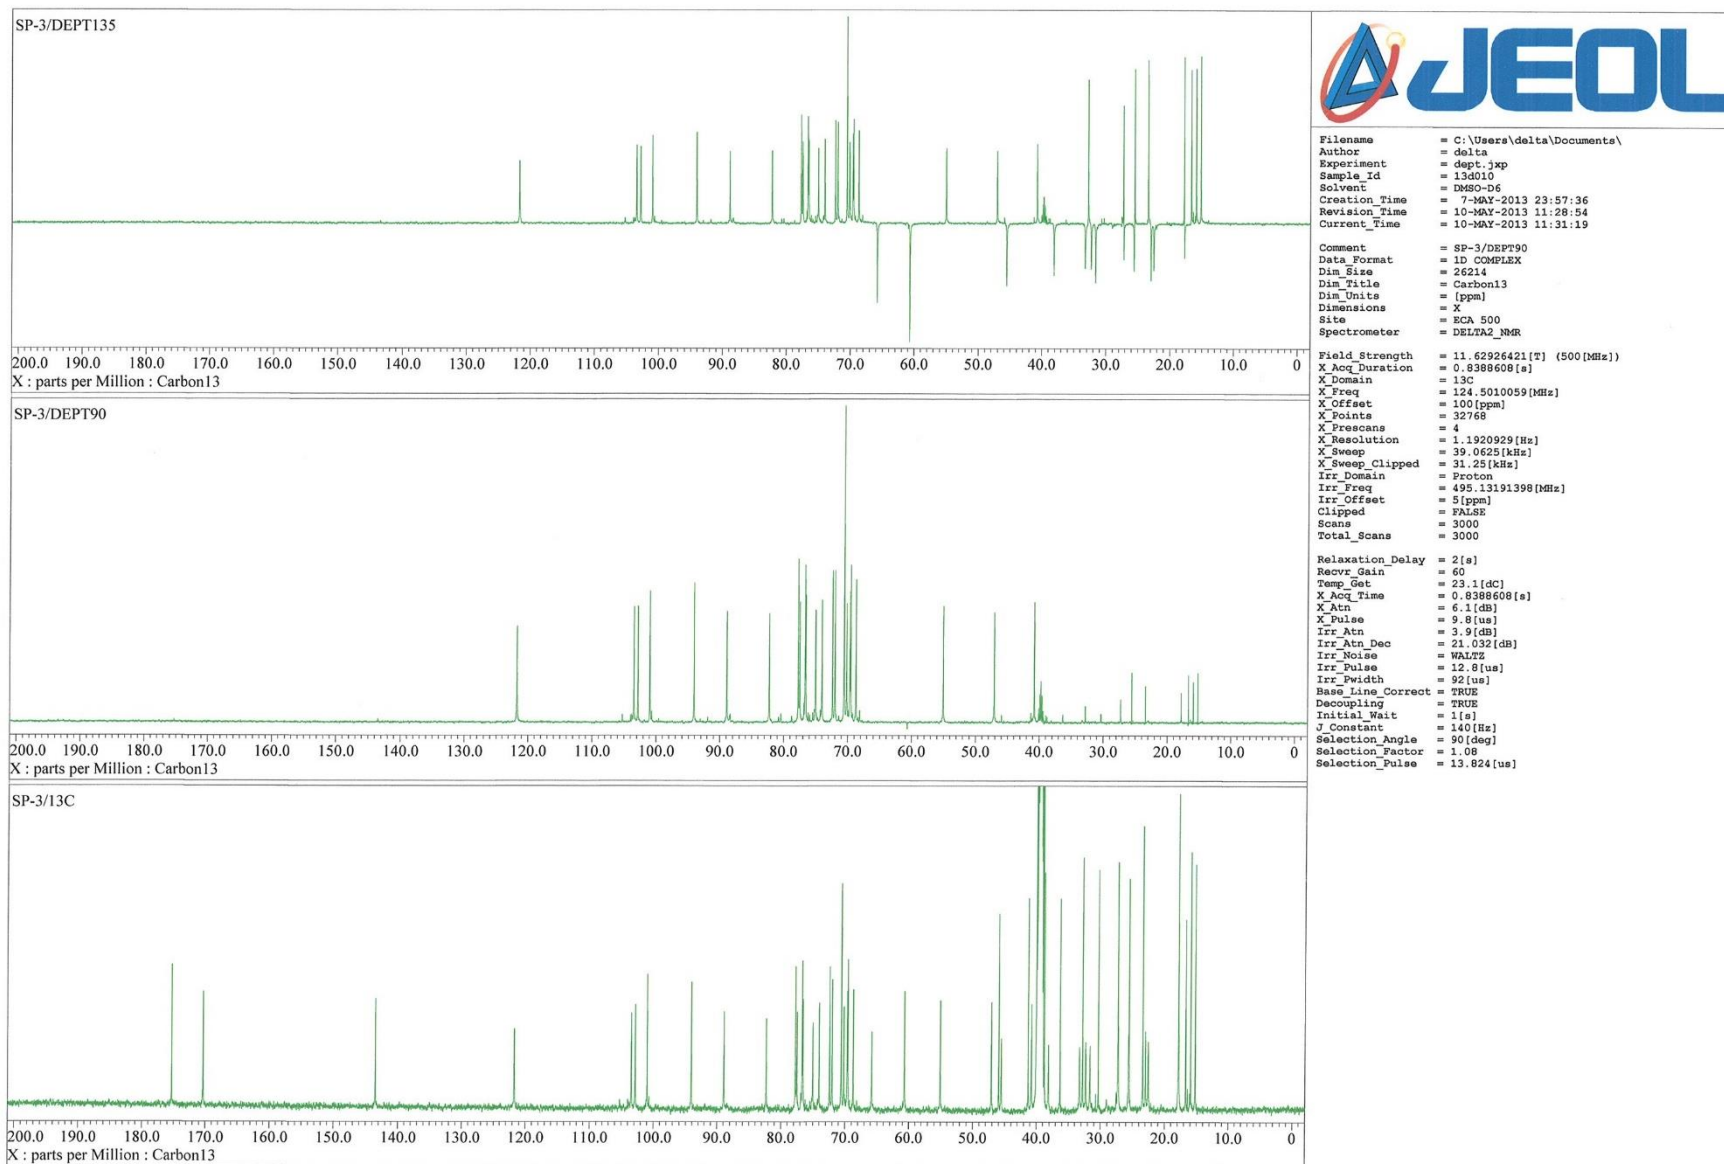

**Figure 52.**  $^1\text{H}$ - $^1\text{H}$  COSY spectrum of oleanolic acid 3-*O*- $\beta$ -D-xylopyranosyl-(1 $\rightarrow$ 2)- $\alpha$ -L-rhamnopyranosyl-(1 $\rightarrow$ 3)- $\beta$ -D-glucuronopyranosyl-28-*O*- $\beta$ -D-glucopyranoside (**6**) in  $\text{DMSO-}d_6$ .

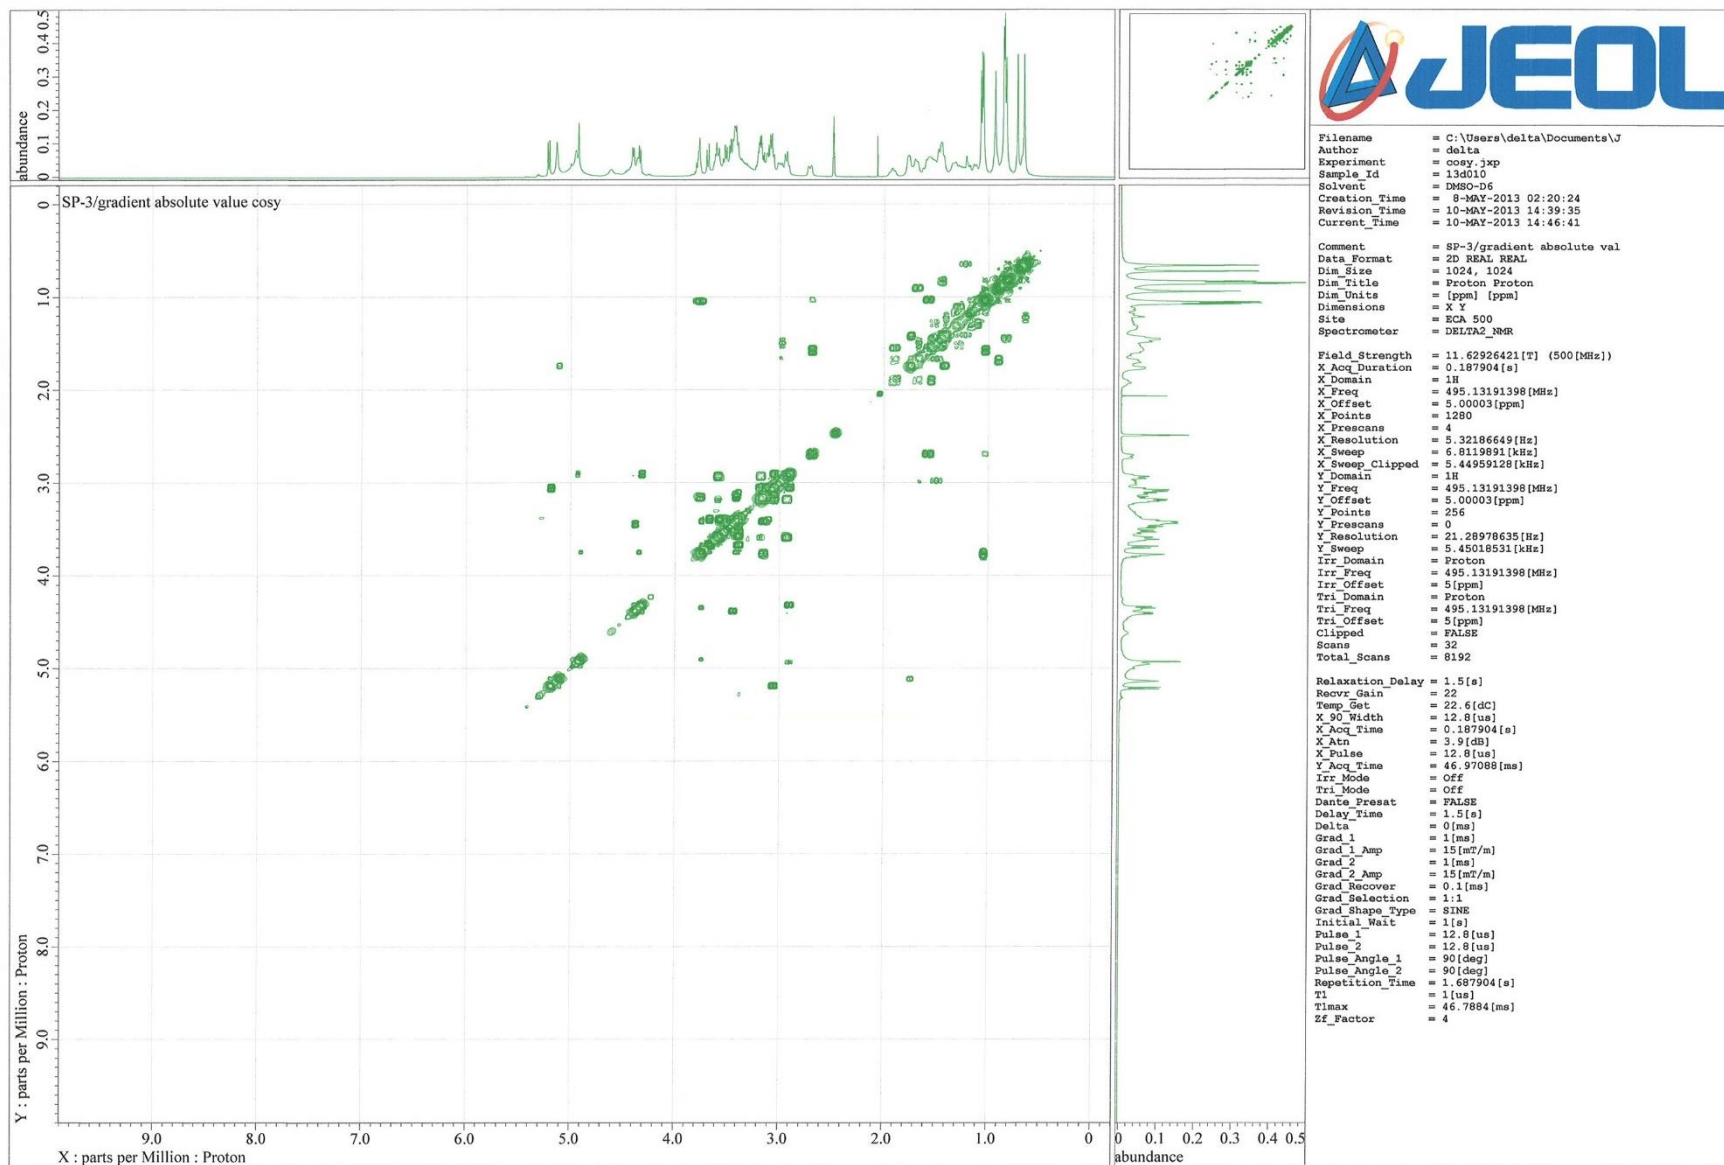

**Figure 53.** HMQC spectrum of oleanolic acid 3-*O*- $\beta$ -D-xylopyranosyl-(1 $\rightarrow$ 2)- $\alpha$ -L-rhamnopyranosyl-(1 $\rightarrow$ 3)- $\beta$ -D-glucuronopyranosyl-28-*O*- $\beta$ -D-glucopyranoside (**6**) in DMSO-*d*<sub>6</sub>.

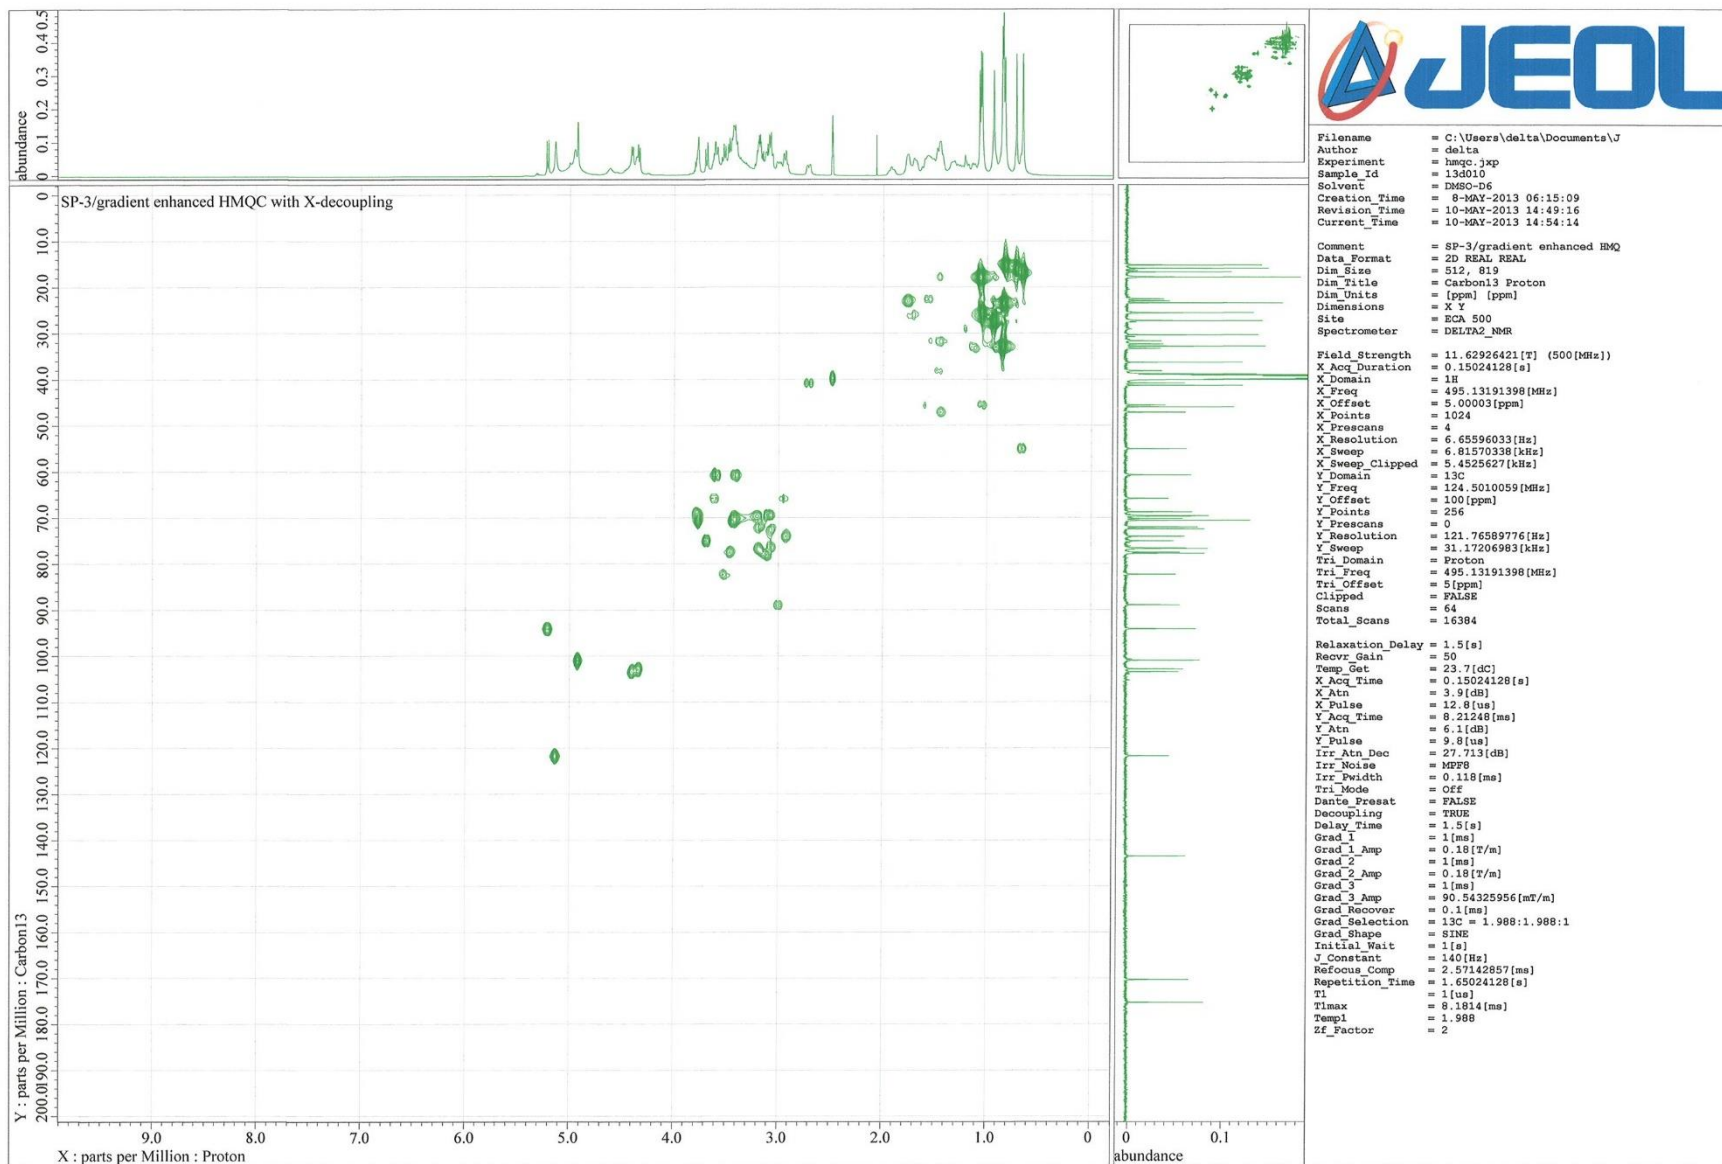

**Figure 54.** HMBC spectrum of oleanolic acid 3-*O*- $\beta$ -D-xylopyranosyl-(1 $\rightarrow$ 2)- $\alpha$ -L-rhamnopyranosyl-(1 $\rightarrow$ 3)- $\beta$ -D-glucuronopyranosyl-28-*O*- $\beta$ -D-glucopyranoside (**6**) in DMSO-*d*<sub>6</sub>.

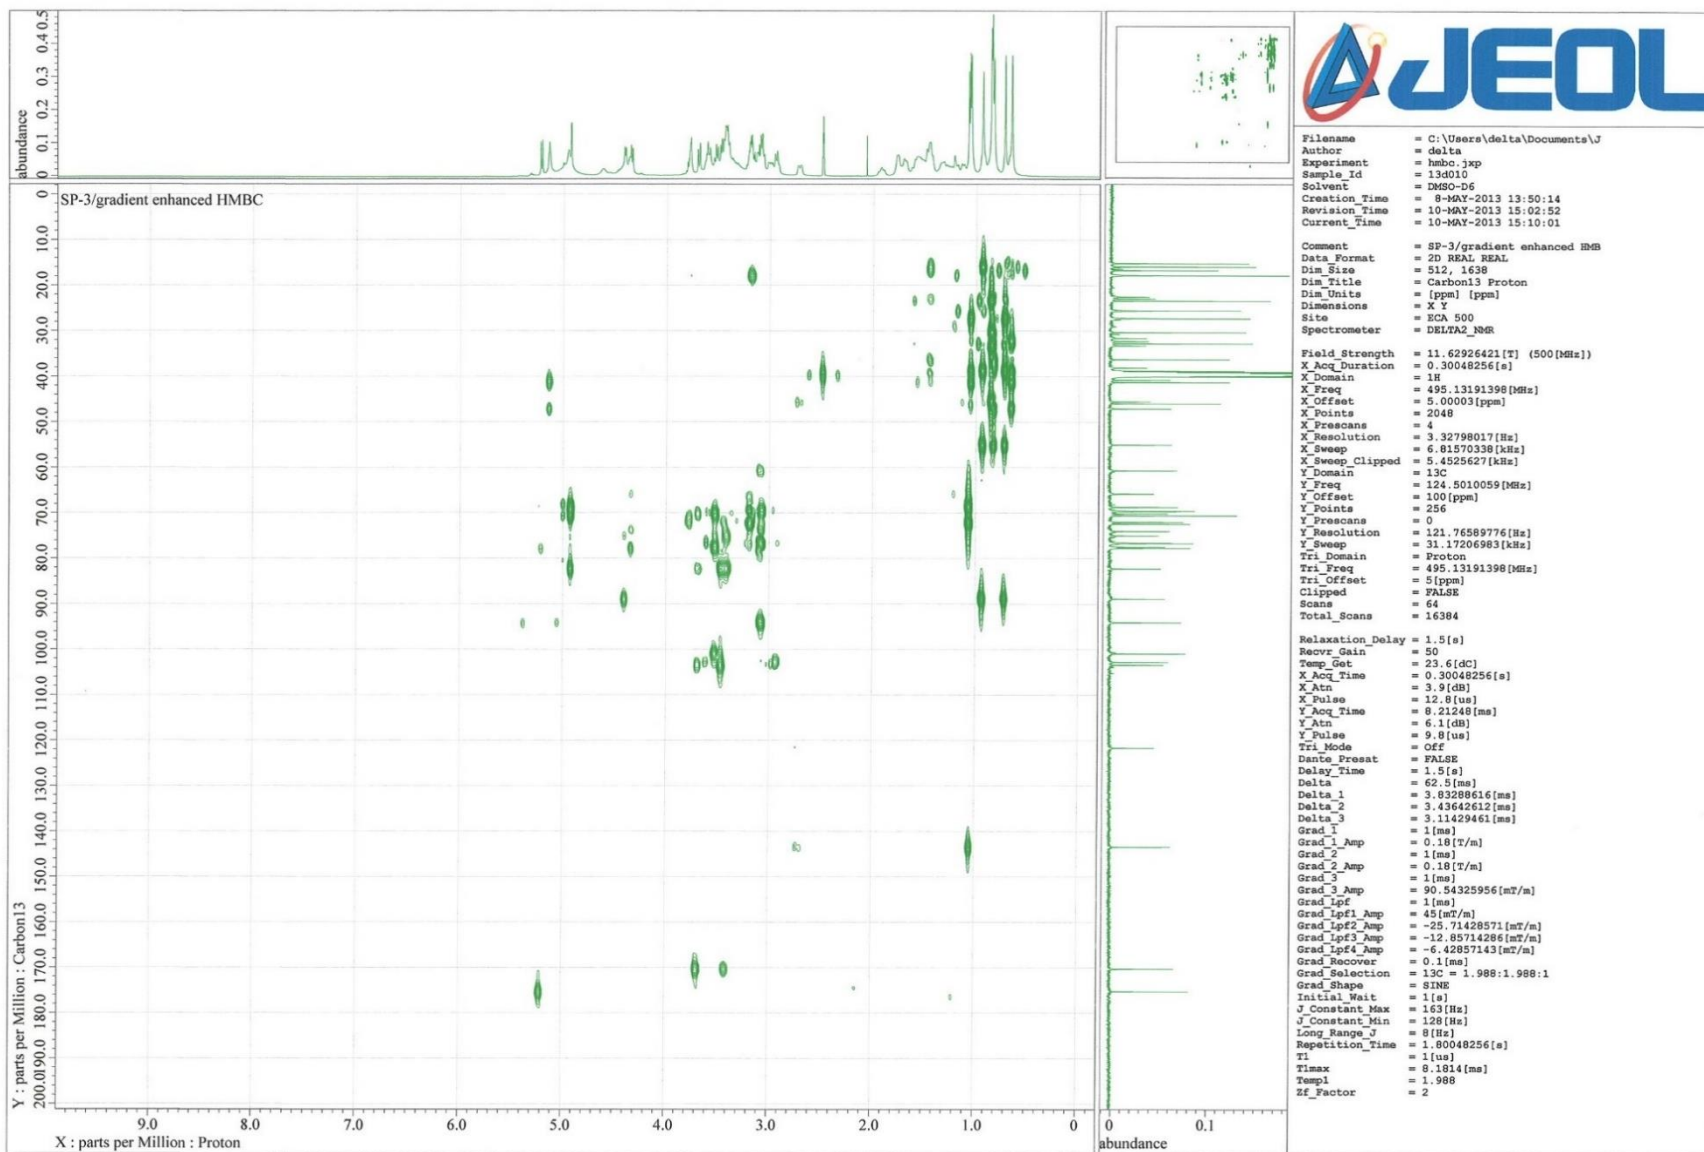

**Figure 55.** HSQC-TOCSY spectrum of oleanolic acid 3-*O*- $\beta$ -D-xylopyranosyl-(1 $\rightarrow$ 2)- $\alpha$ -L-rhamnopyranosyl-(1 $\rightarrow$ 3)- $\beta$ -D-glucuronopyranosyl-28-*O*- $\beta$ -D-glucopyranoside (6) in DMSO-*d*<sub>6</sub>.

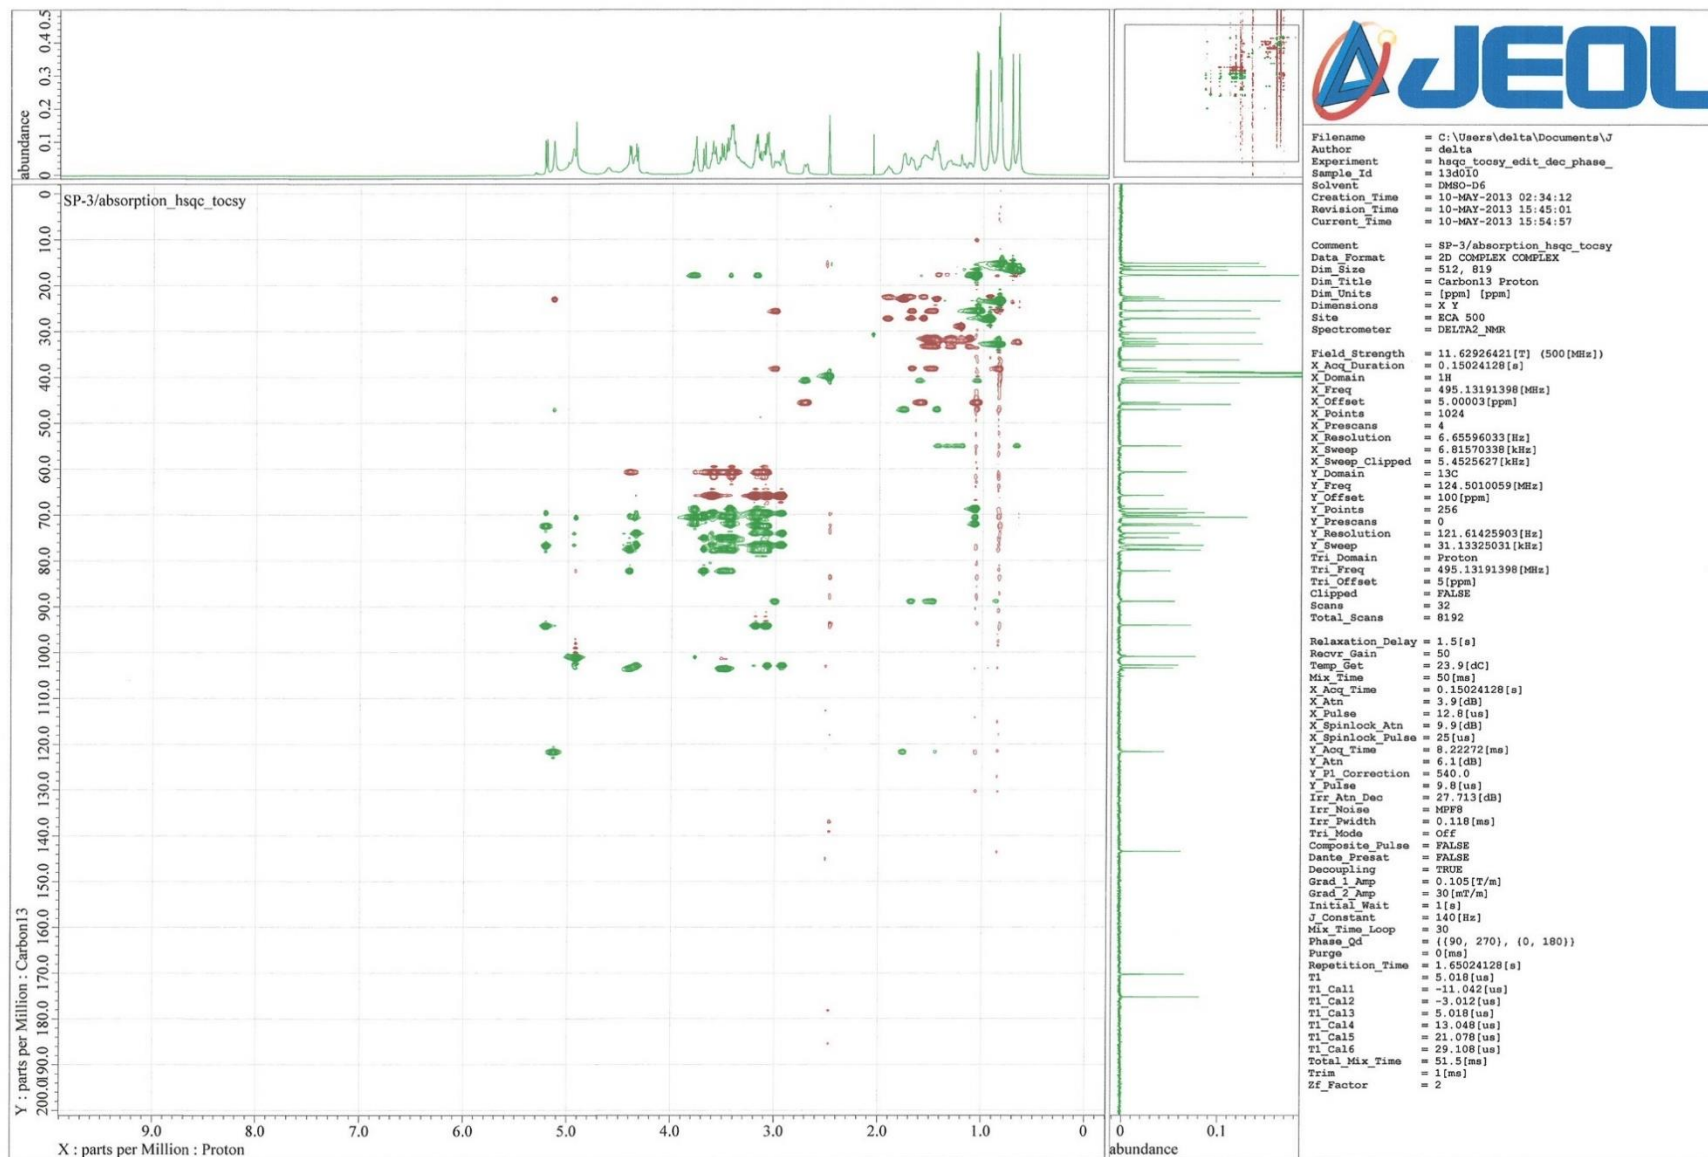

**Figure 56.** pfg-TOCSY spectrum of oleanolic acid 3-*O*-β-D-xylopyranosyl-(1→2)-α-L-rhamnopyranosyl-(1→3)-β-D-glucuronopyranosyl-28-*O*-β-D-glucopyranoside (**6**) in DMSO-*d*<sub>6</sub>.

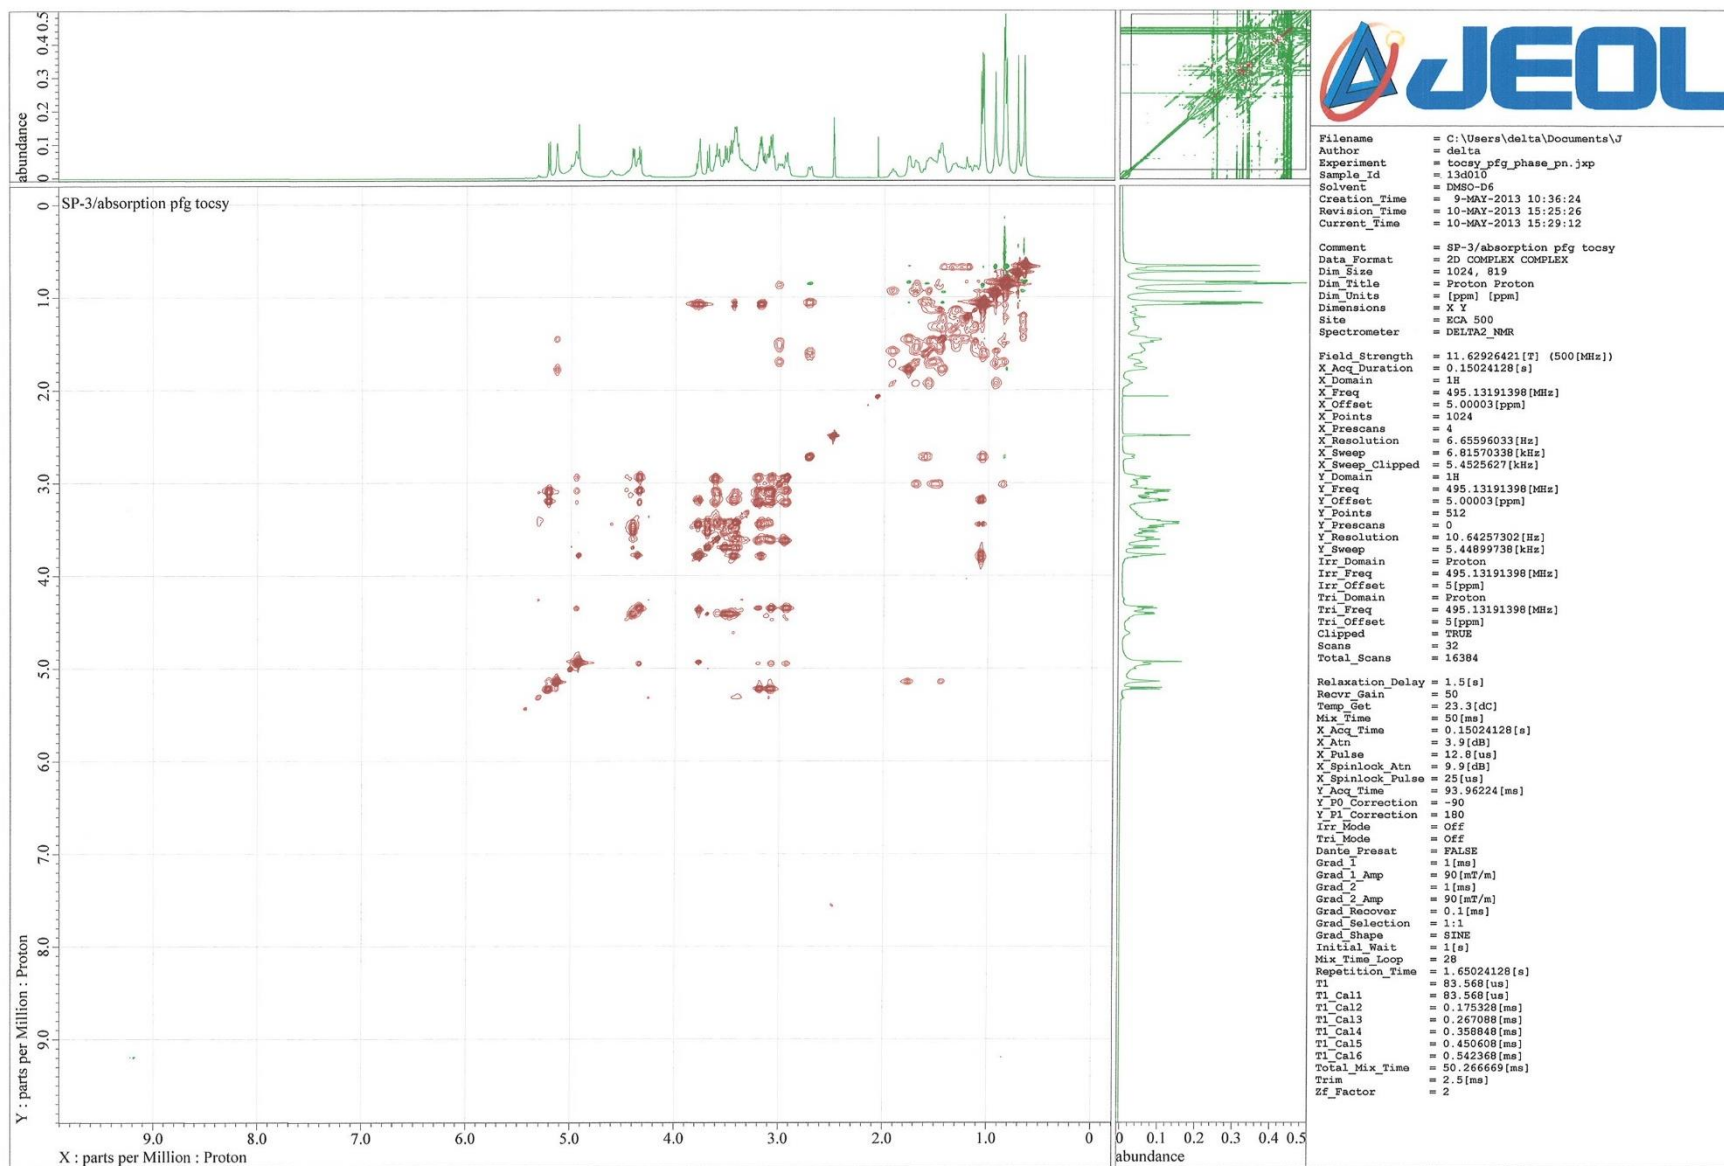

**Figure 57.** NOESY spectrum of oleanolic acid 3-*O*- $\beta$ -D-xylopyranosyl-(1 $\rightarrow$ 2)- $\alpha$ -L-rhamnopyranosyl-(1 $\rightarrow$ 3)- $\beta$ -D-glucuronopyranosyl-28-*O*- $\beta$ -D-glucopyranoside (**6**) in DMSO-*d*<sub>6</sub>.

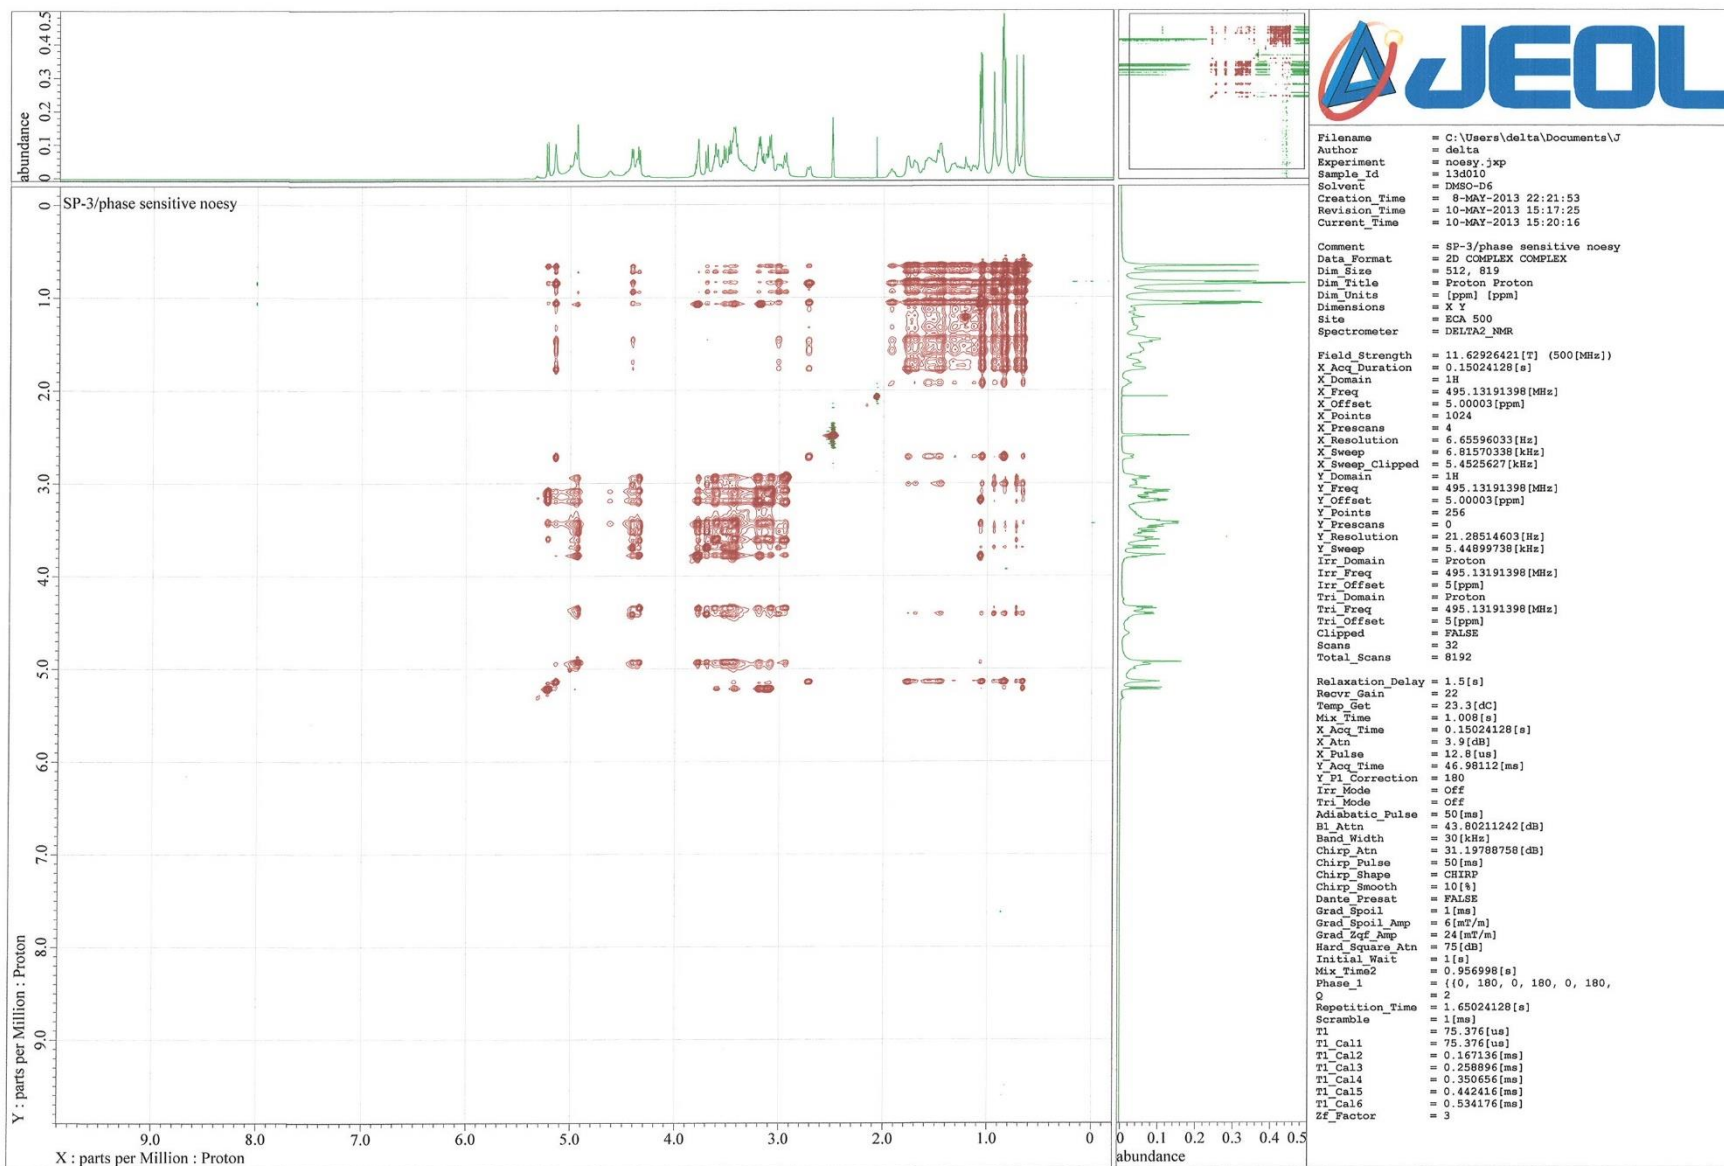



Figure 58. <sup>1</sup>H NMR spectrum (500 MHz) of stenoside A (7) in DMSO-d<sub>6</sub>.

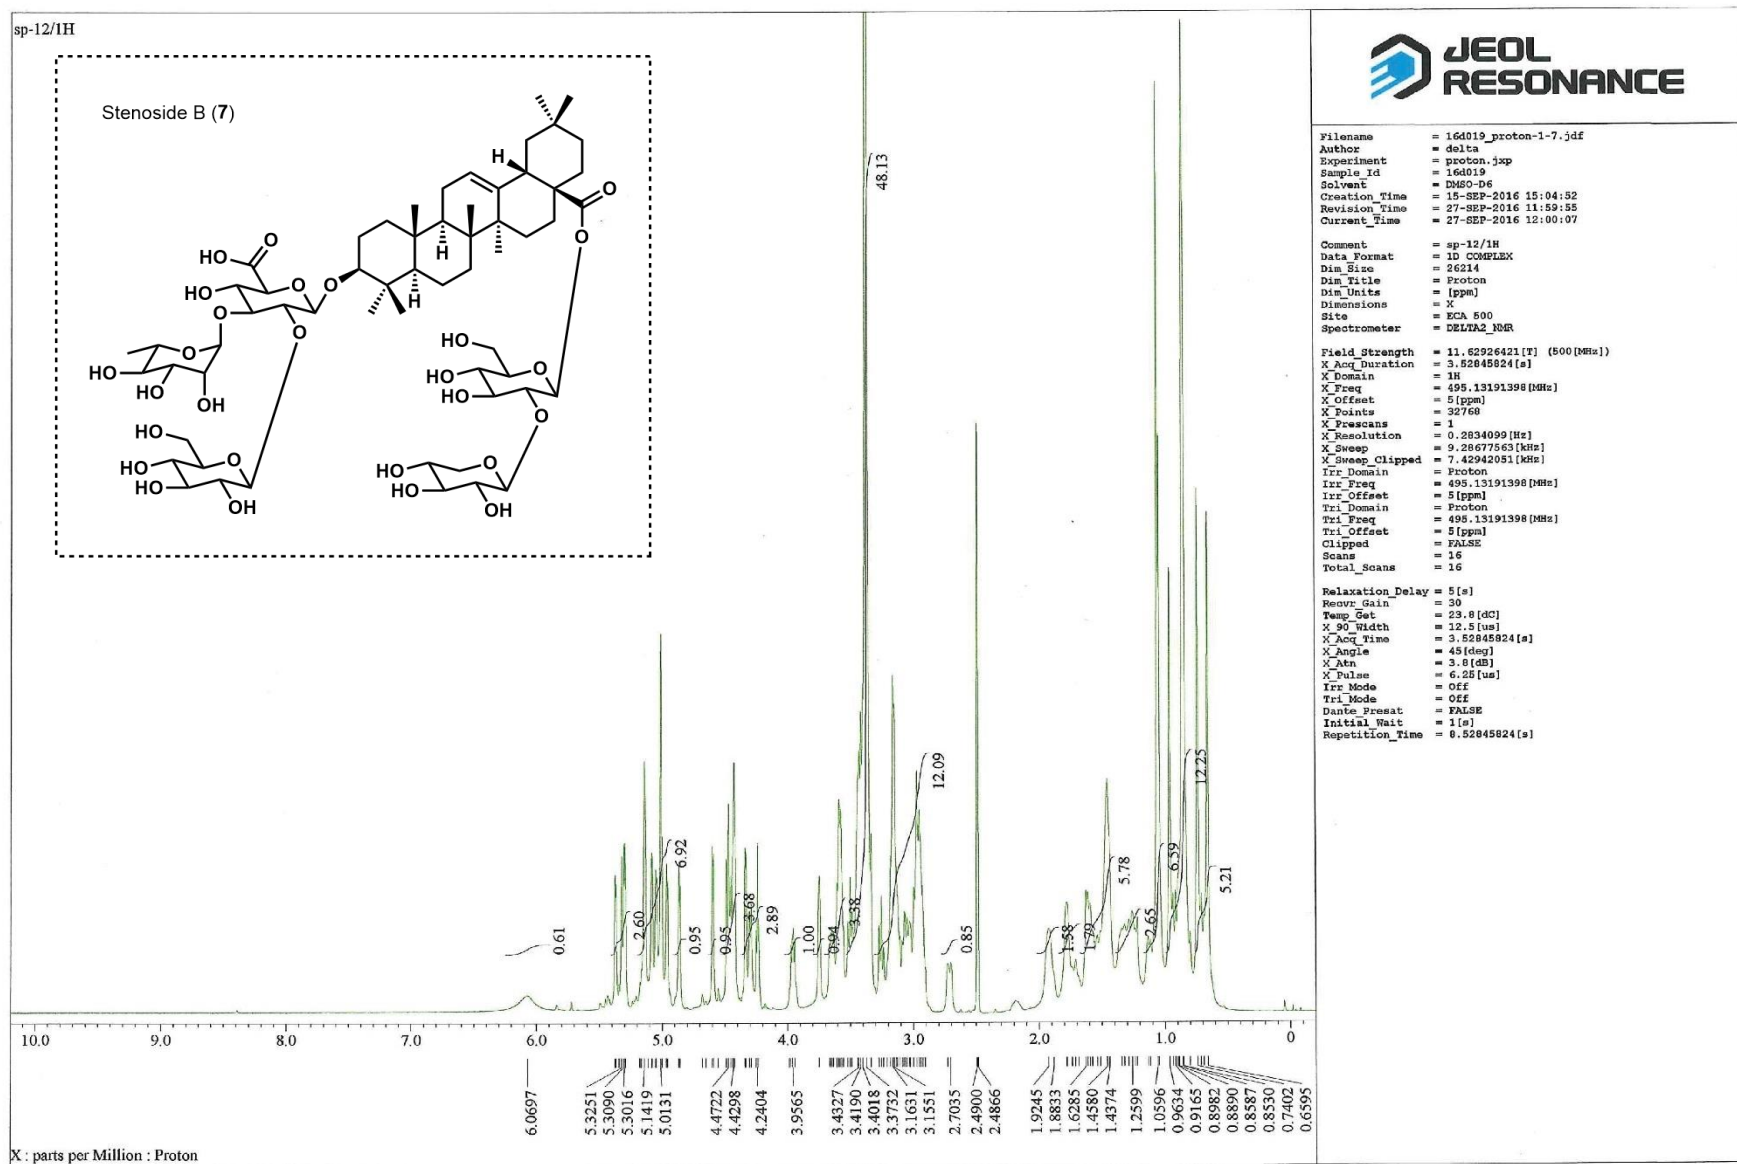

Figure 59.  $^{13}\text{C}$  NMR spectrum (125 MHz) of stenoside A (7) in  $\text{DMSO-}d_6$ .

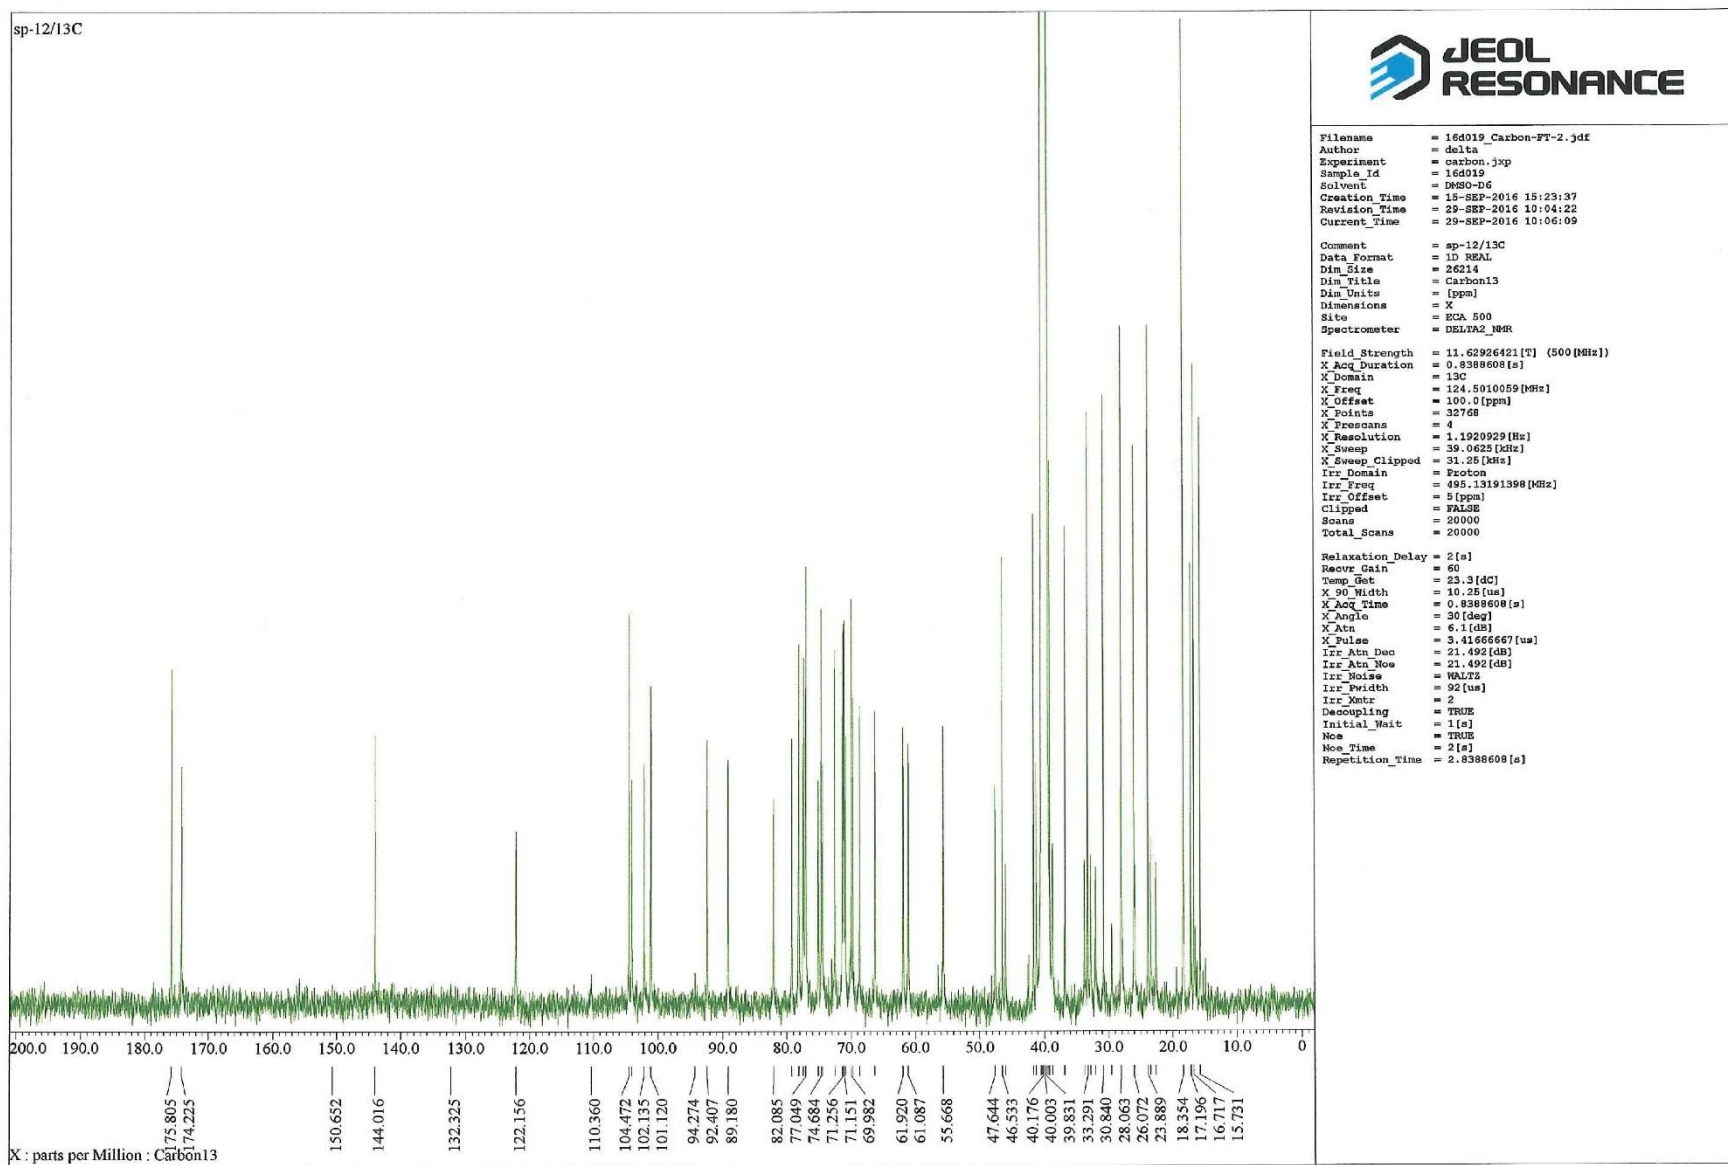

Figure 60. DEPT 90 and 135 pulse NMR spectra of stenoside A (7) in DMSO-*d*<sub>6</sub>.

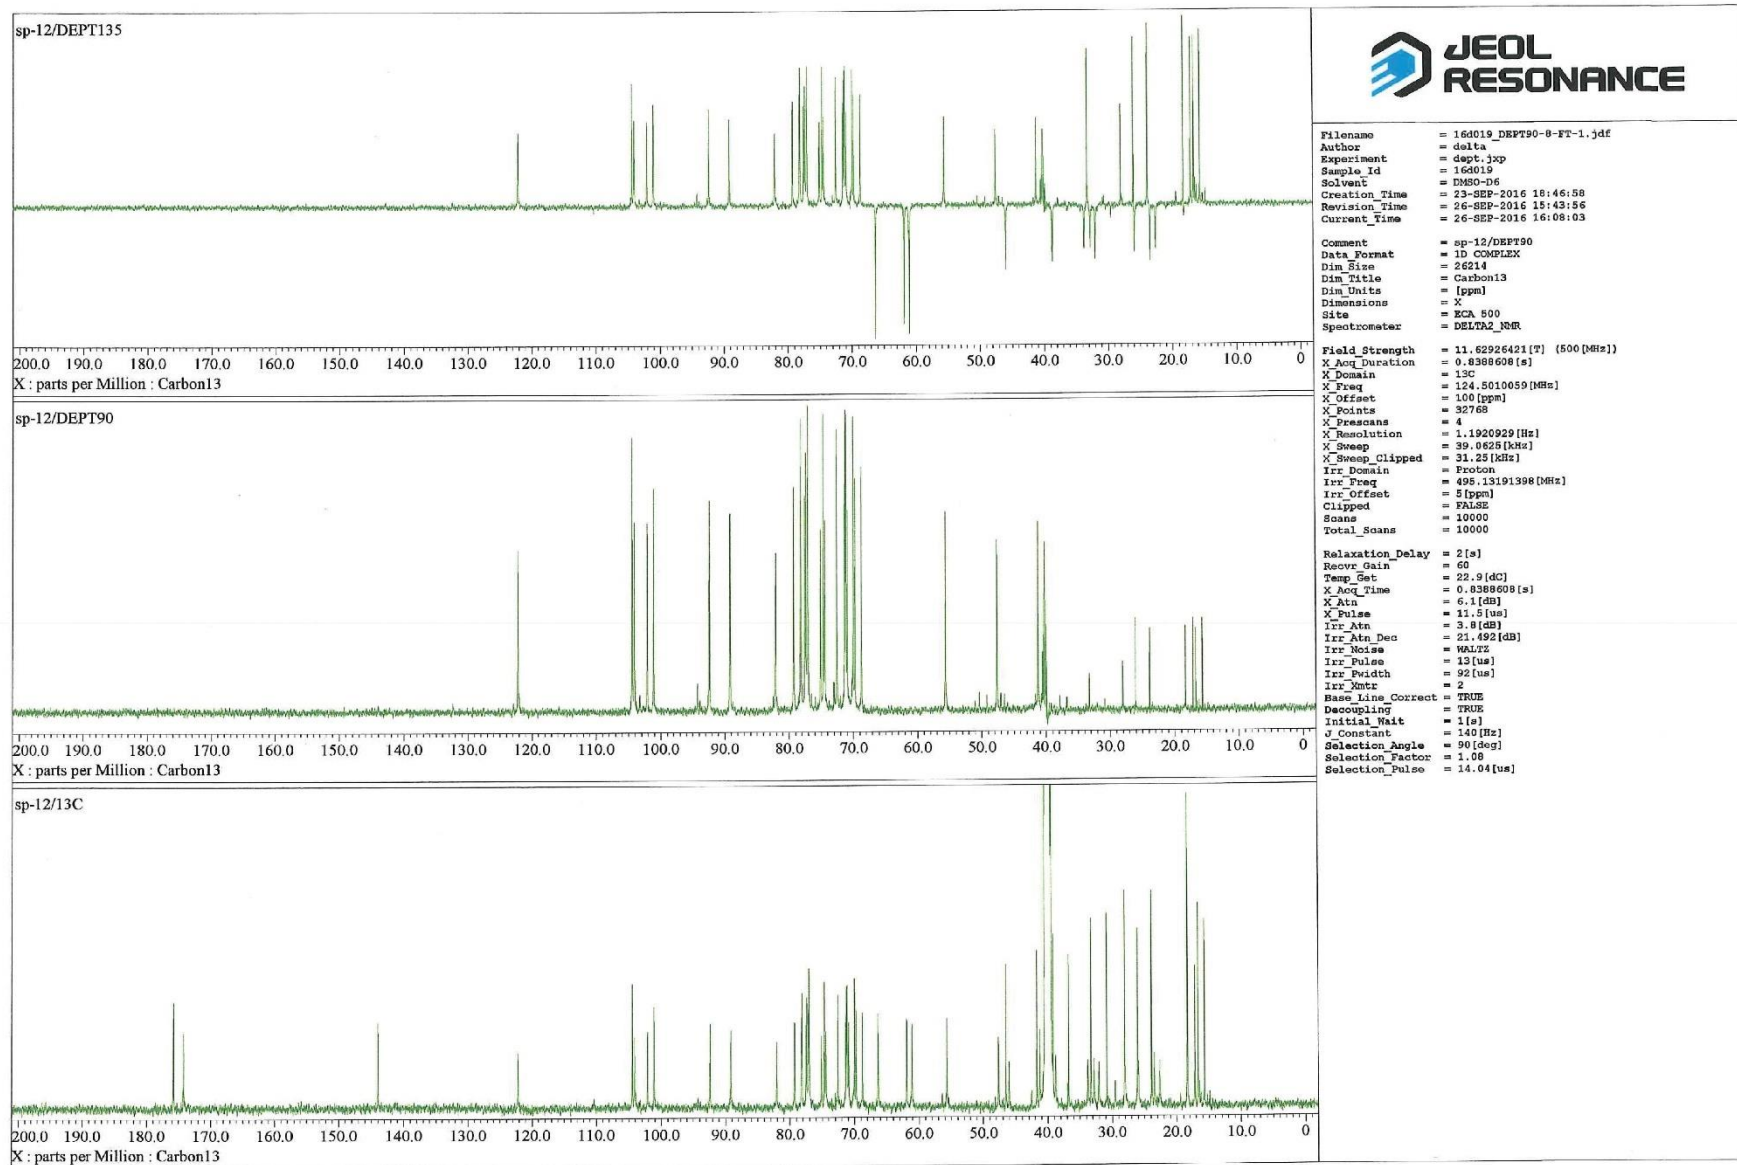

Figure 61. DQF-COSY spectrum of stenosiide A (7) in DMSO-*d*<sub>6</sub>.

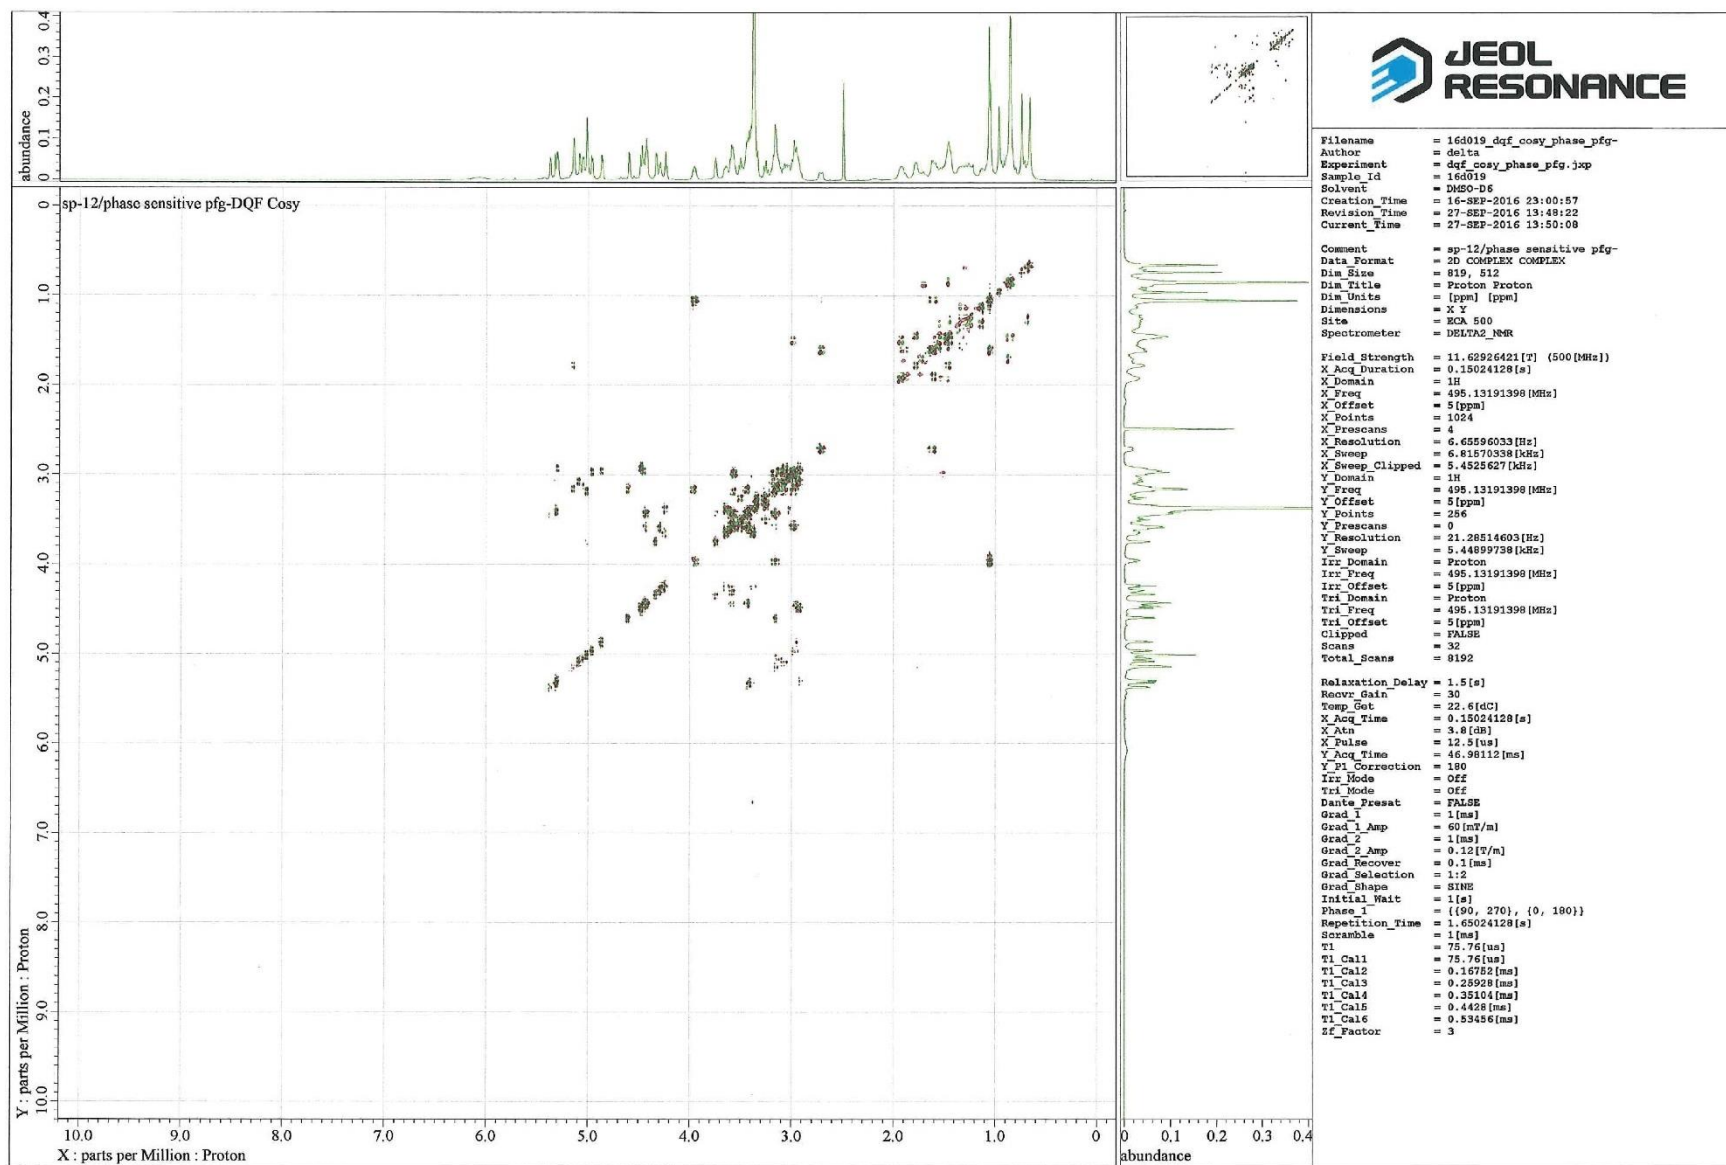

Figure 62. HMQC spectrum of stenosiide A (7) in DMSO-*d*<sub>6</sub>.

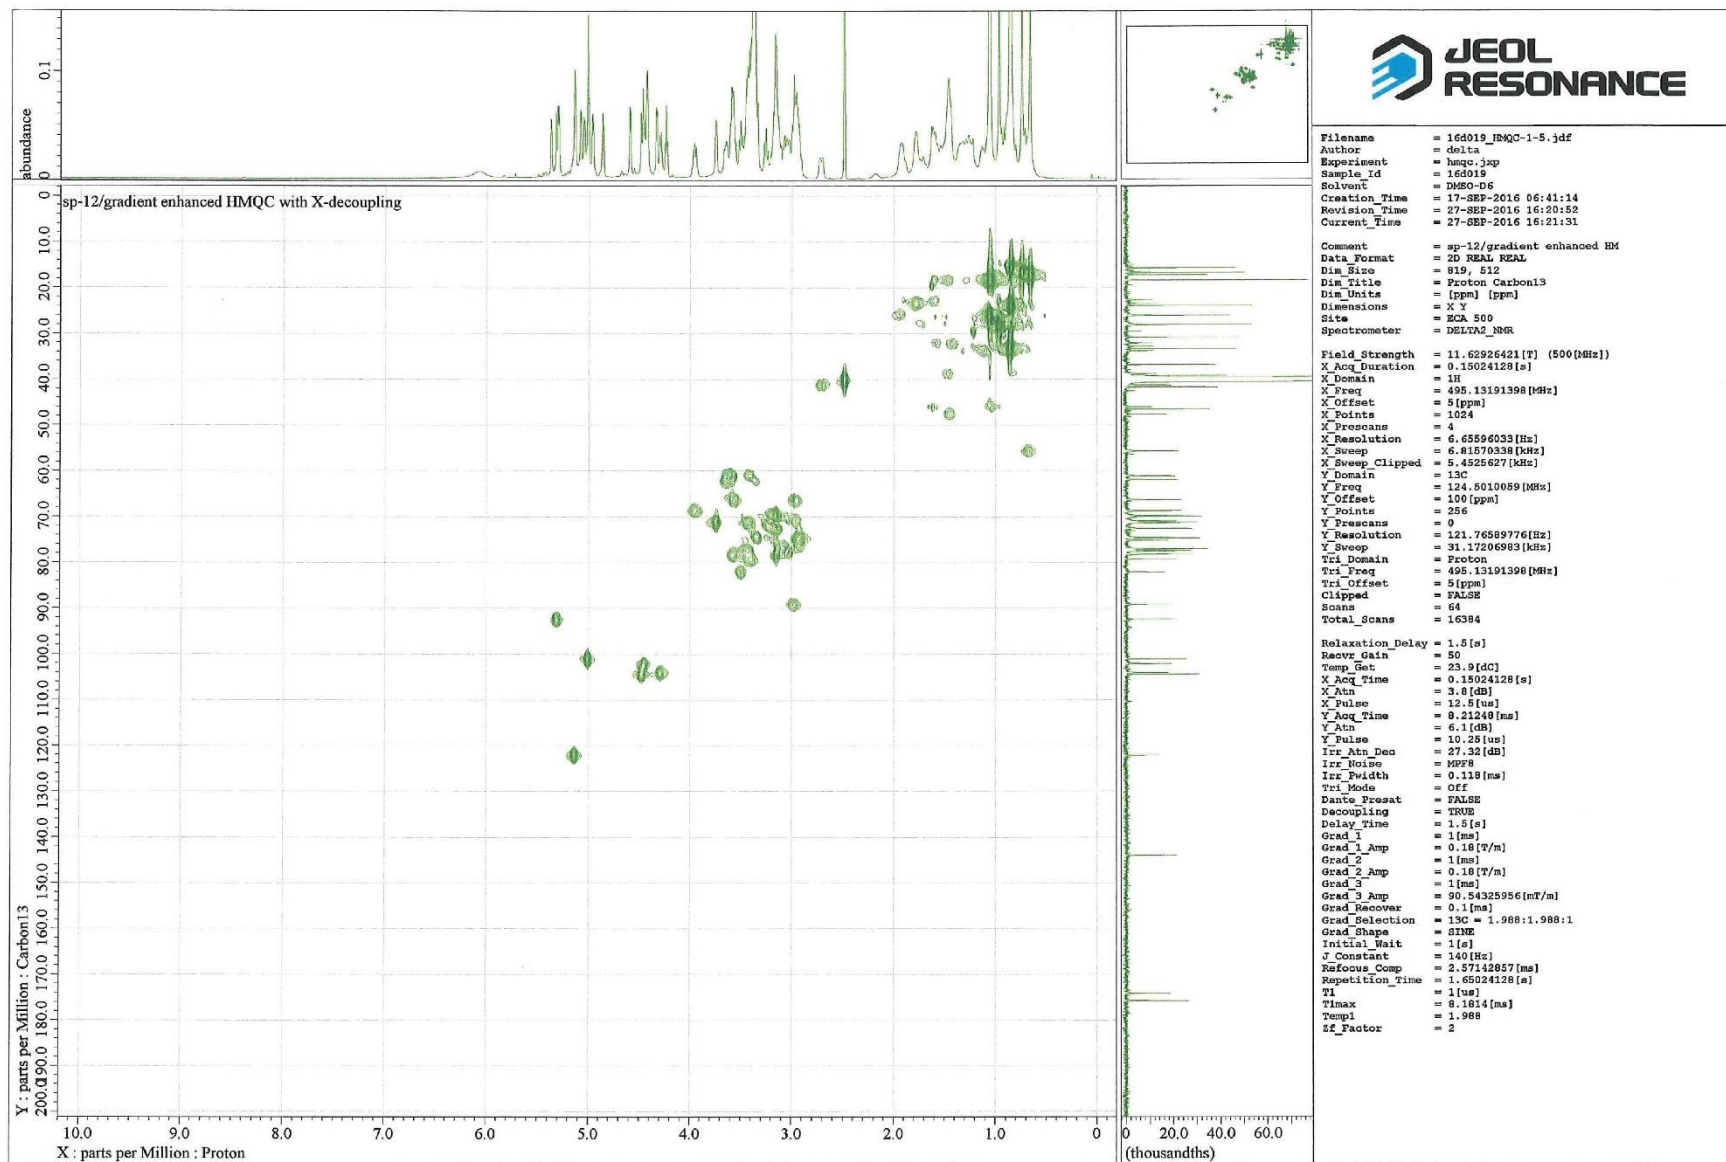

Figure 63. HMBC spectrum of stenosiide A (7) in DMSO-*d*<sub>6</sub>.

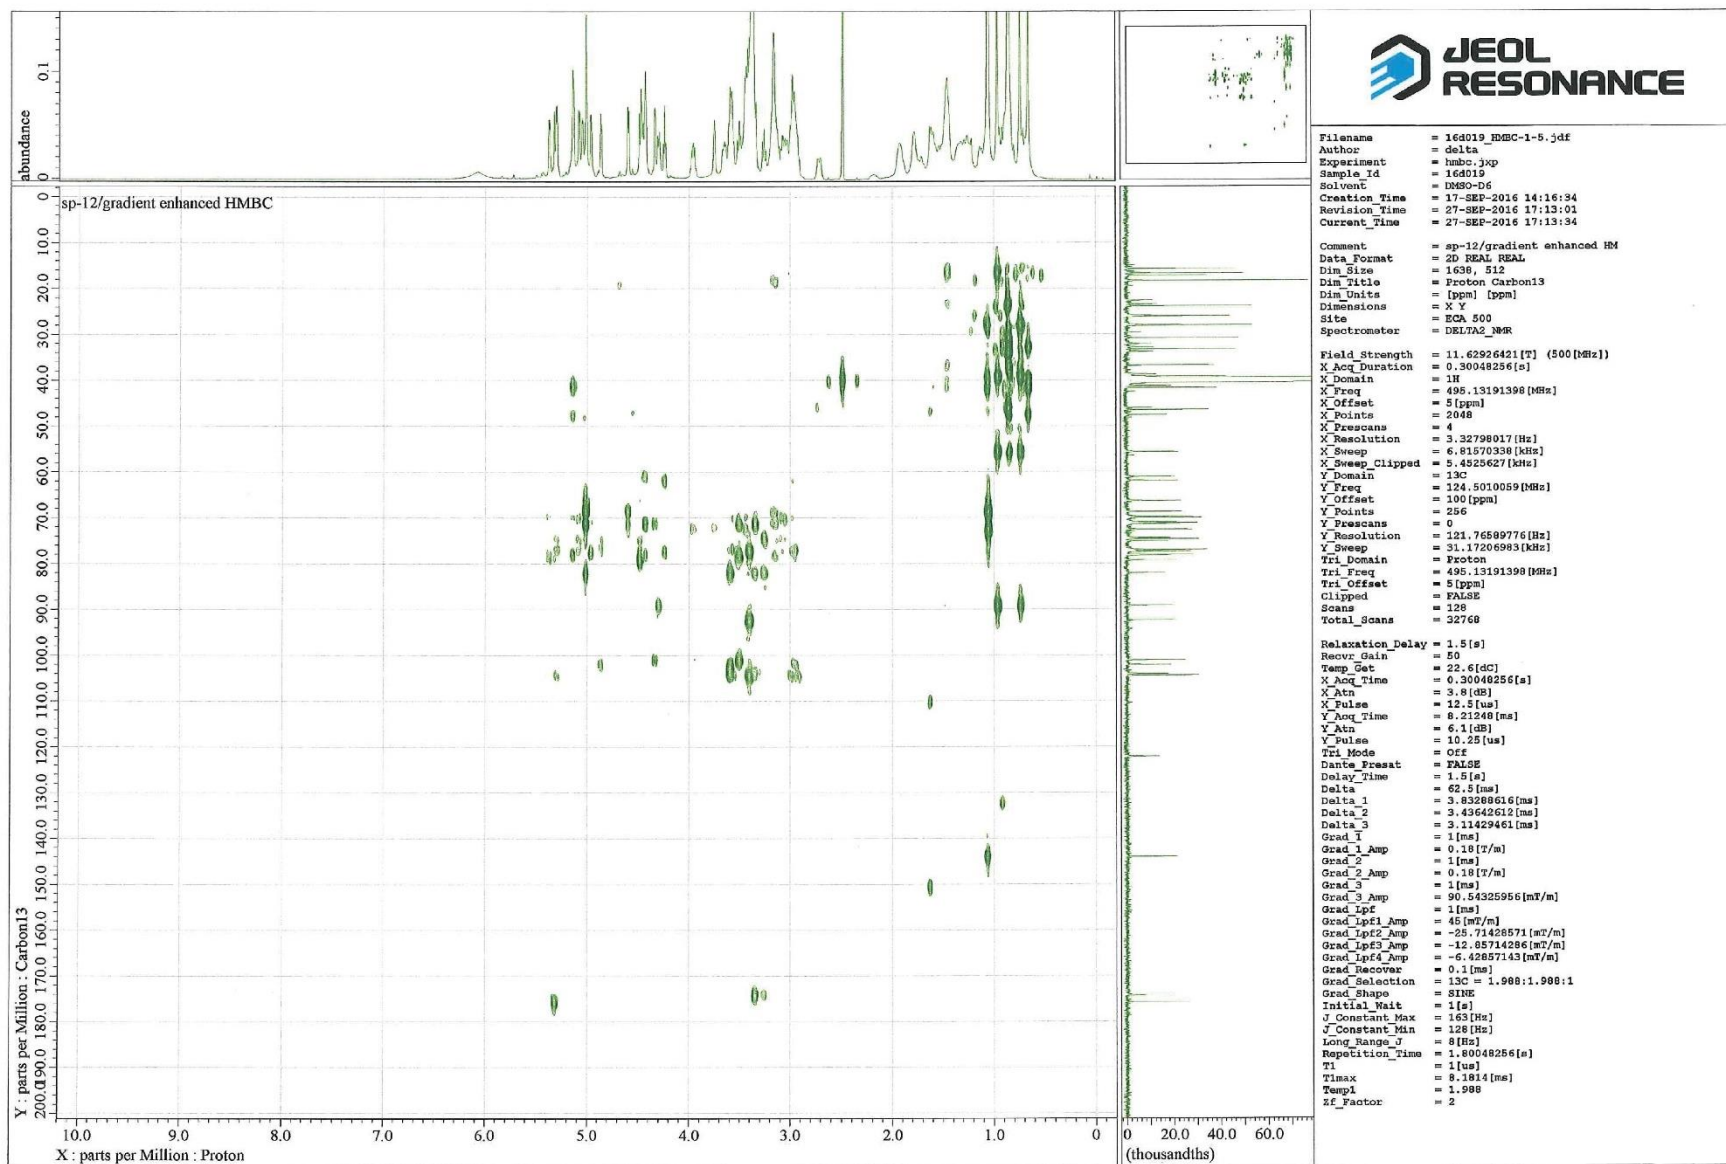

Figure 64. HSQC-TOCSY spectrum of stenoside A (7) in DMSO-*d*<sub>6</sub>.

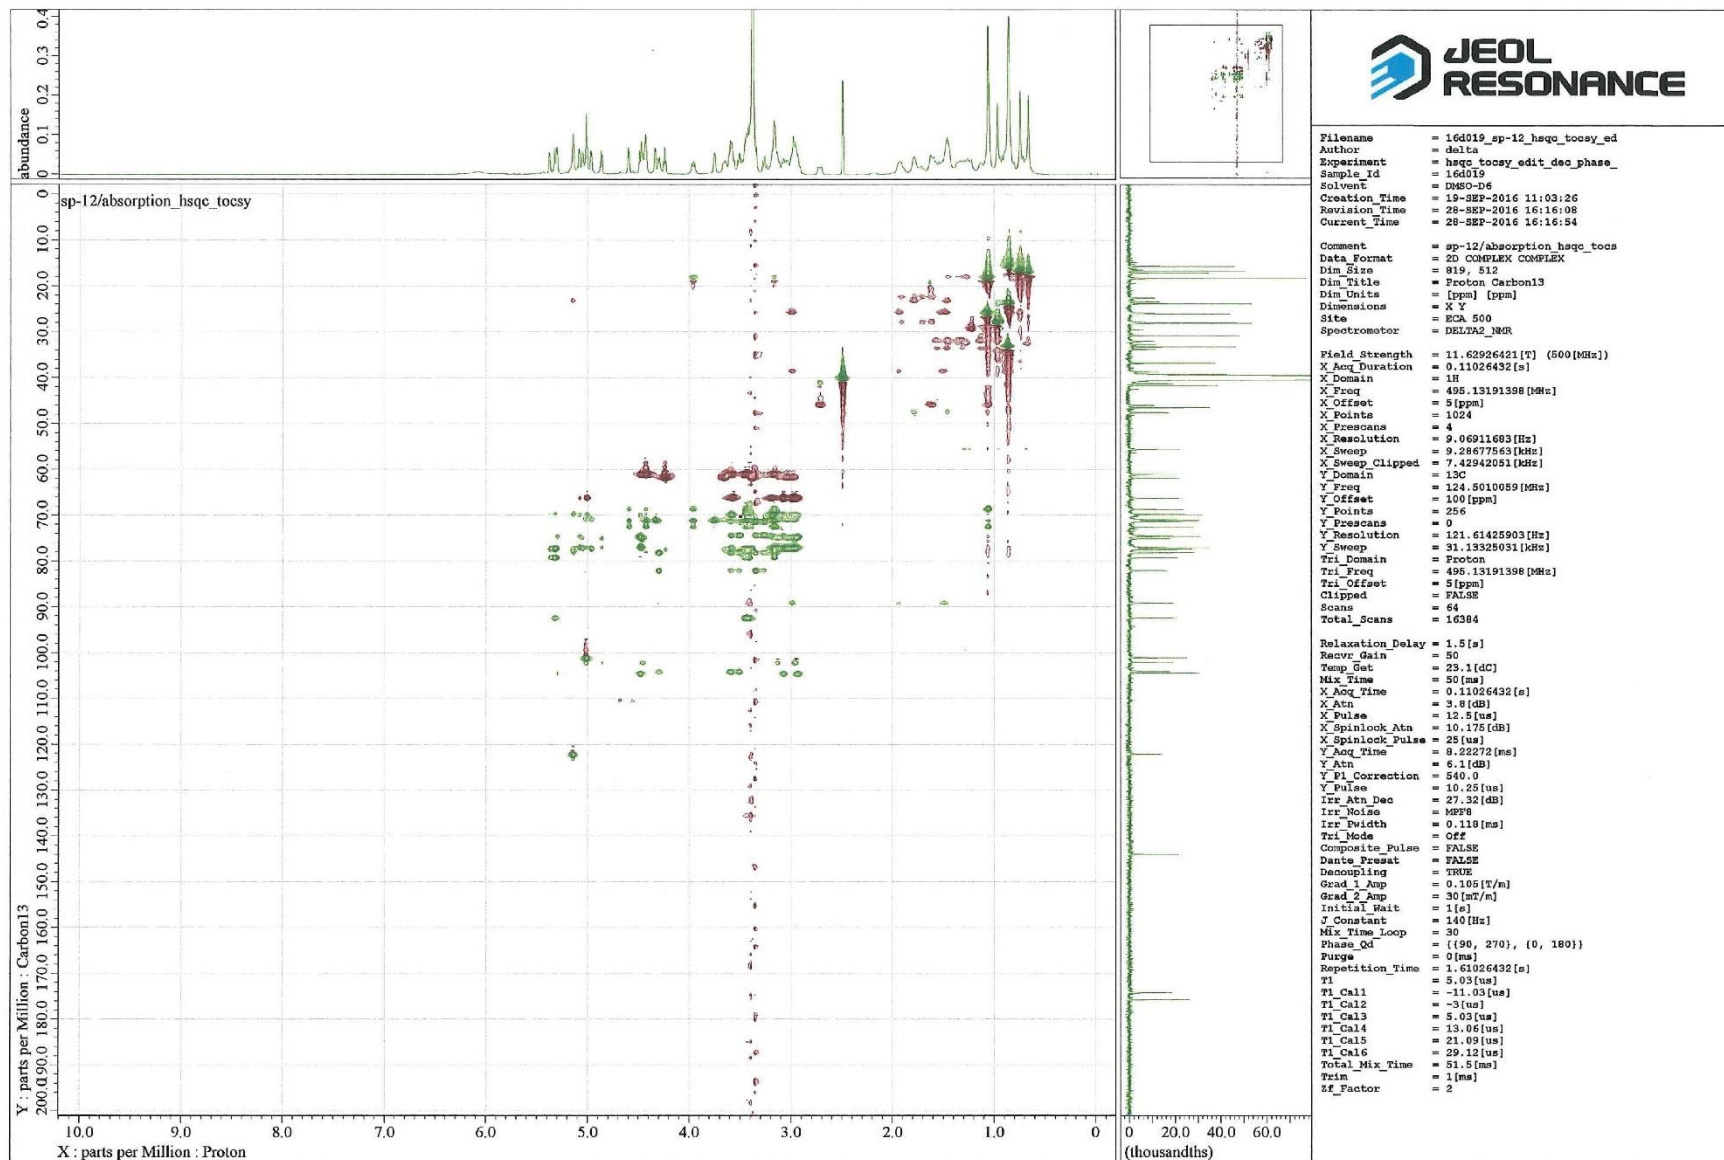

Figure 65. pfg-TOCSY spectrum of stenoside A (7) in DMSO-*d*<sub>6</sub>.

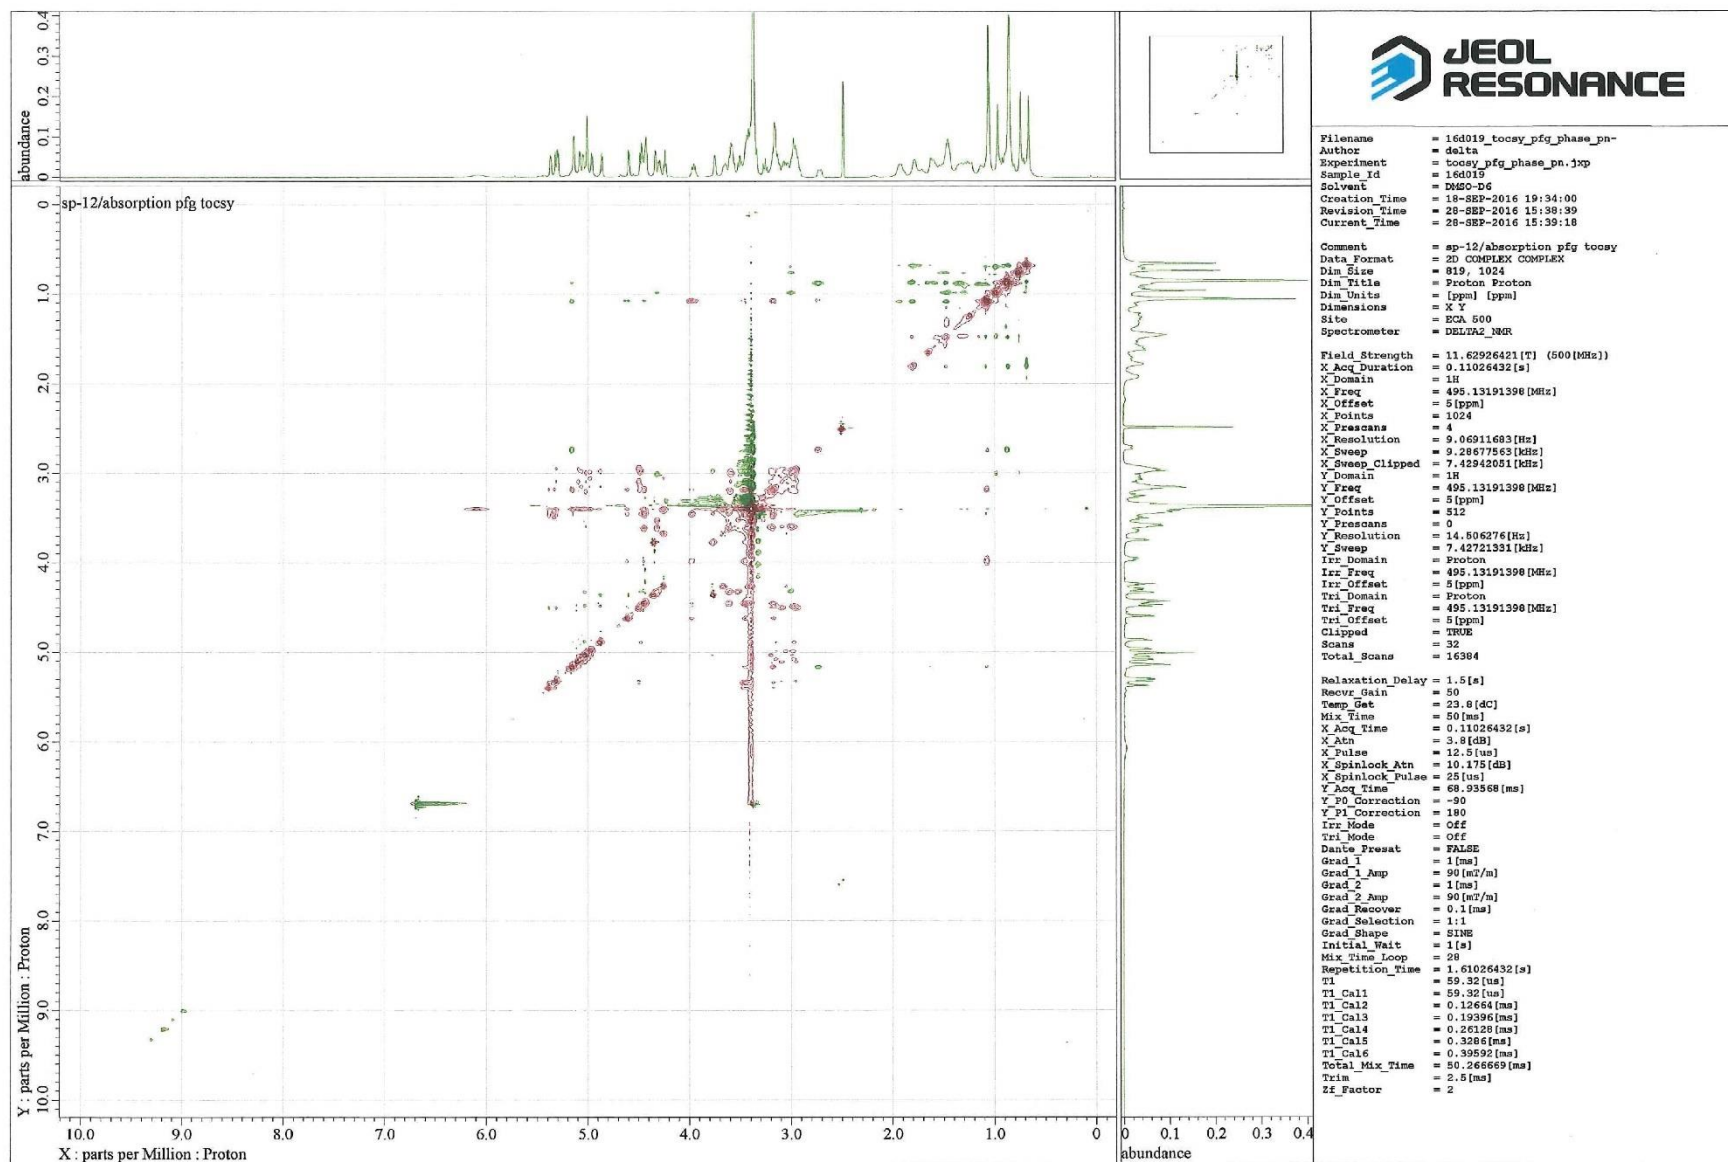



Figure 66. NOESY spectrum of stenoside A (7) in DMSO-*d*<sub>6</sub>.

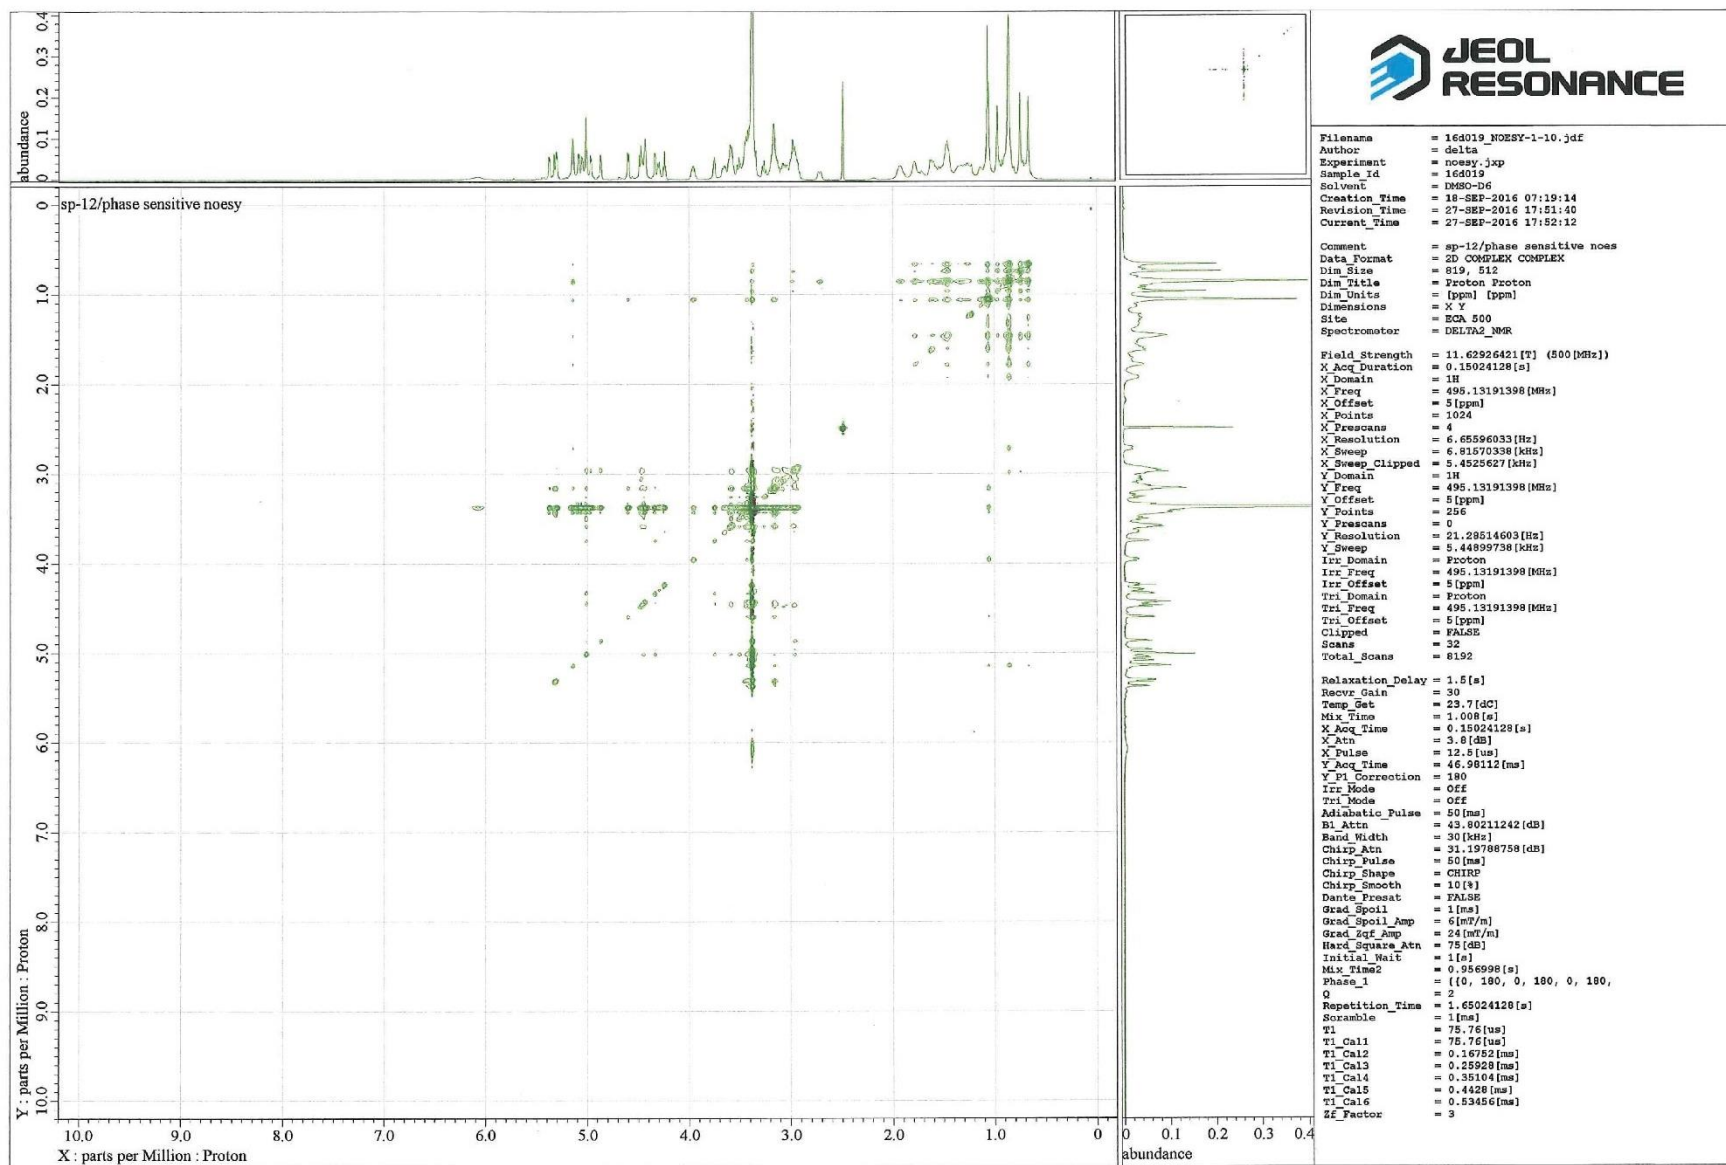

Supplement: 11418_2020_1463_MOESM1_ESM.pdf [file 11418_2020_1463_MOESM1_ESM.pdf]
